# Supplementary material for: HOG1 Mitogen-Activated Protein Kinase Pathway–Related Autophagy Induced by H2O2 in Lentinula edodes Mycelia
Source: MDPI journal article supplement (doi:10.3390/jof9040413), 2023-03-28
Supplement: s1 [file s1]

## Supplemental Material

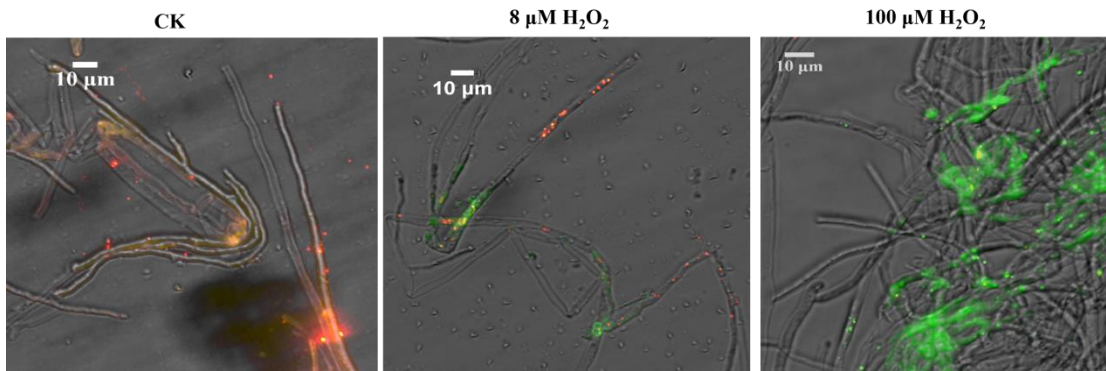

**Figure S1 JC-1 staining of mycelia treated with 0, 8, or 100  $\mu\text{M}$   $\text{H}_2\text{O}_2$ .**

Red fluorescence indicates polarised healthy mitochondria, and green fluorescence indicates depolarised mitochondria.

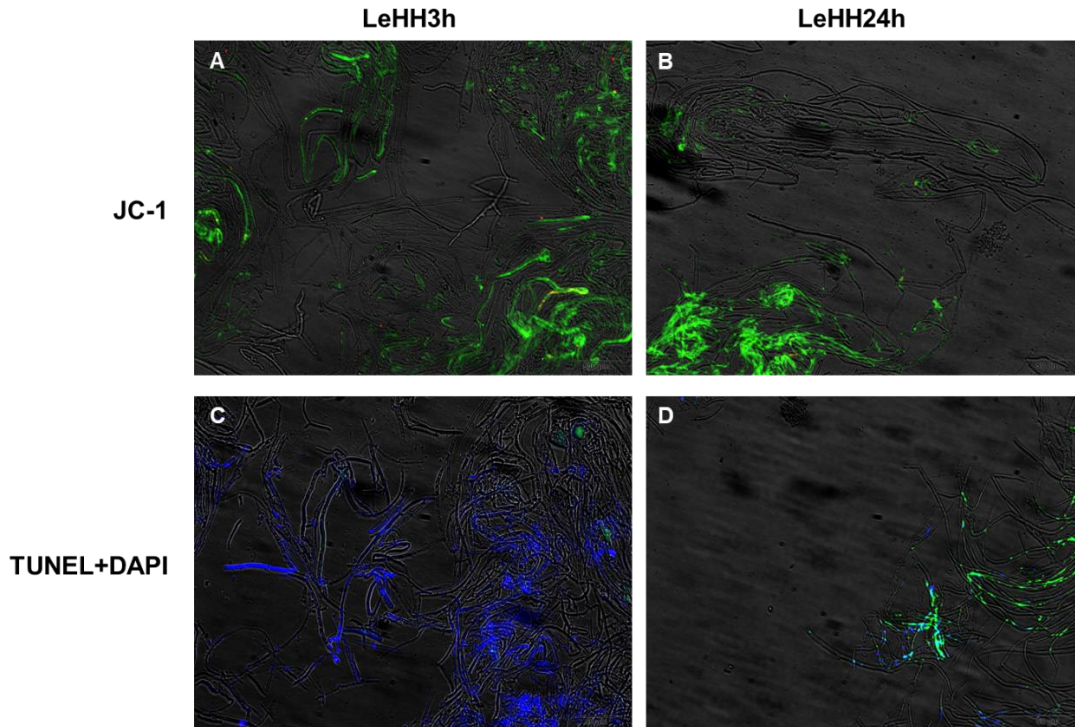

**Figure S2 Subcellular phenotype changes of *Lentinula edodes* mycelia after treated with 100  $\mu\text{M}$   $\text{H}_2\text{O}_2$  for 3h and 24h.**

A-B: JC-1 labeled mitochondrial membrane potential changes in mycelia. Red fluorescence indicates polarised healthy mitochondria, and green fluorescence indicates depolarised mitochondria. C-D: The total nuclei and DNA fragments were per-formed by DAPI and TUNEL fluorescence staining. Blue fluorescence showed DAPI-labeled total nuclei. Green fluorescence showed TUNEL-labeled DNA fragments. Bar = 50  $\mu\text{m}$ .

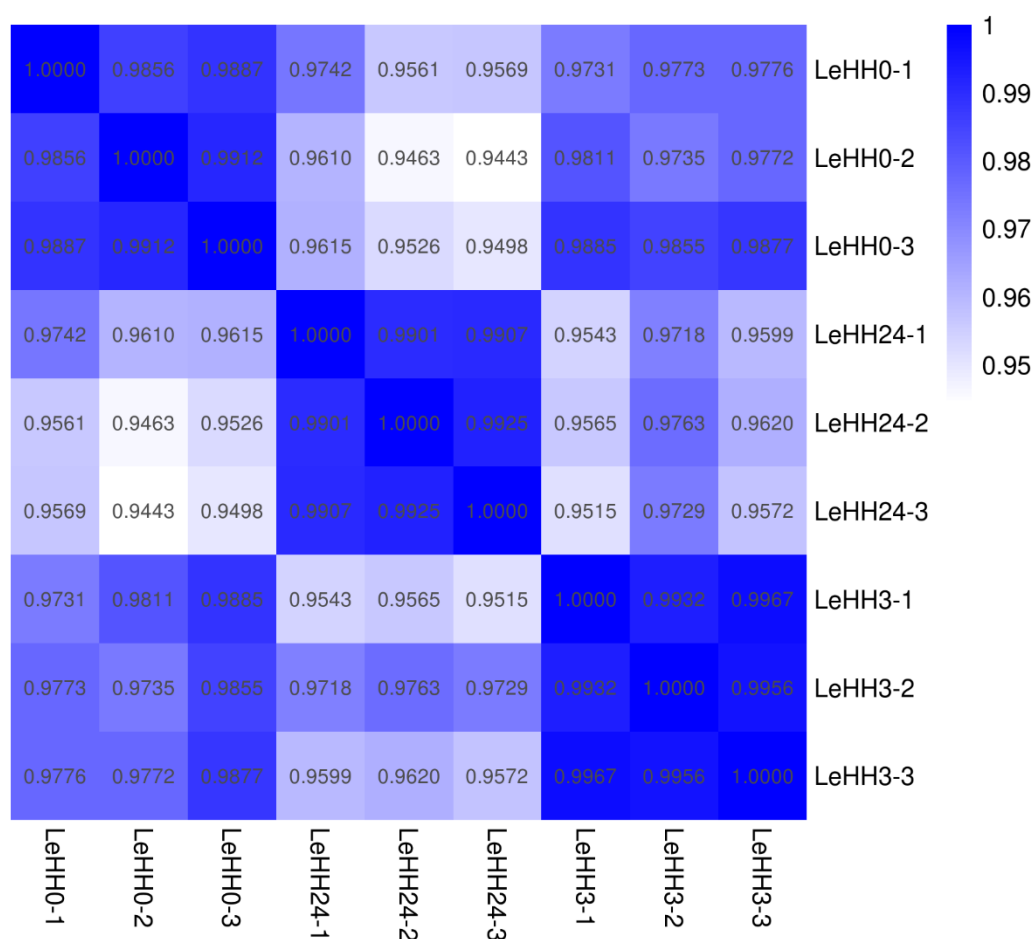

**Figure S3 Pearson correlation value between biological replicates.**

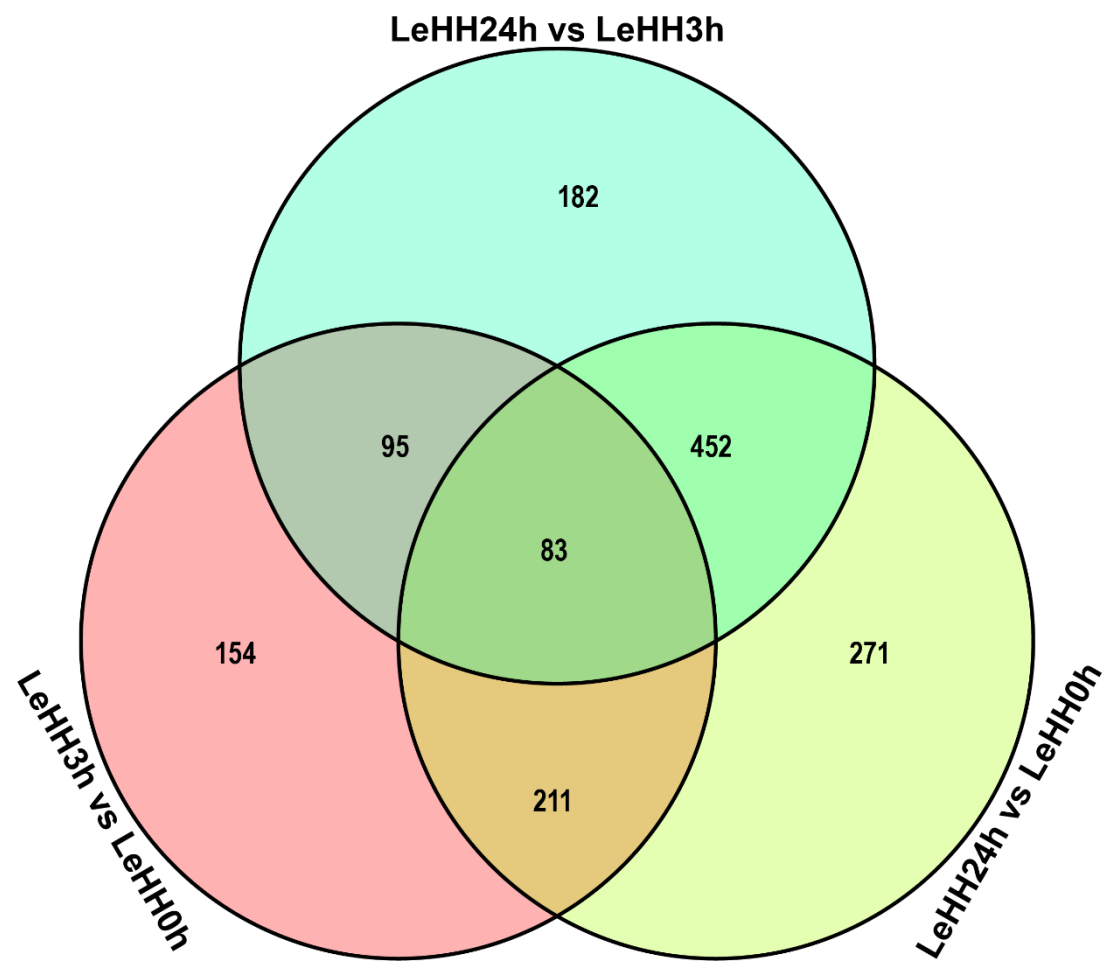

**Figure S4 Venn diagram of DEGs in LeHH3h vs. LeHH0h, LeHH24h vs. LeHH0h, and LeHH24h vs. LeHH3.**

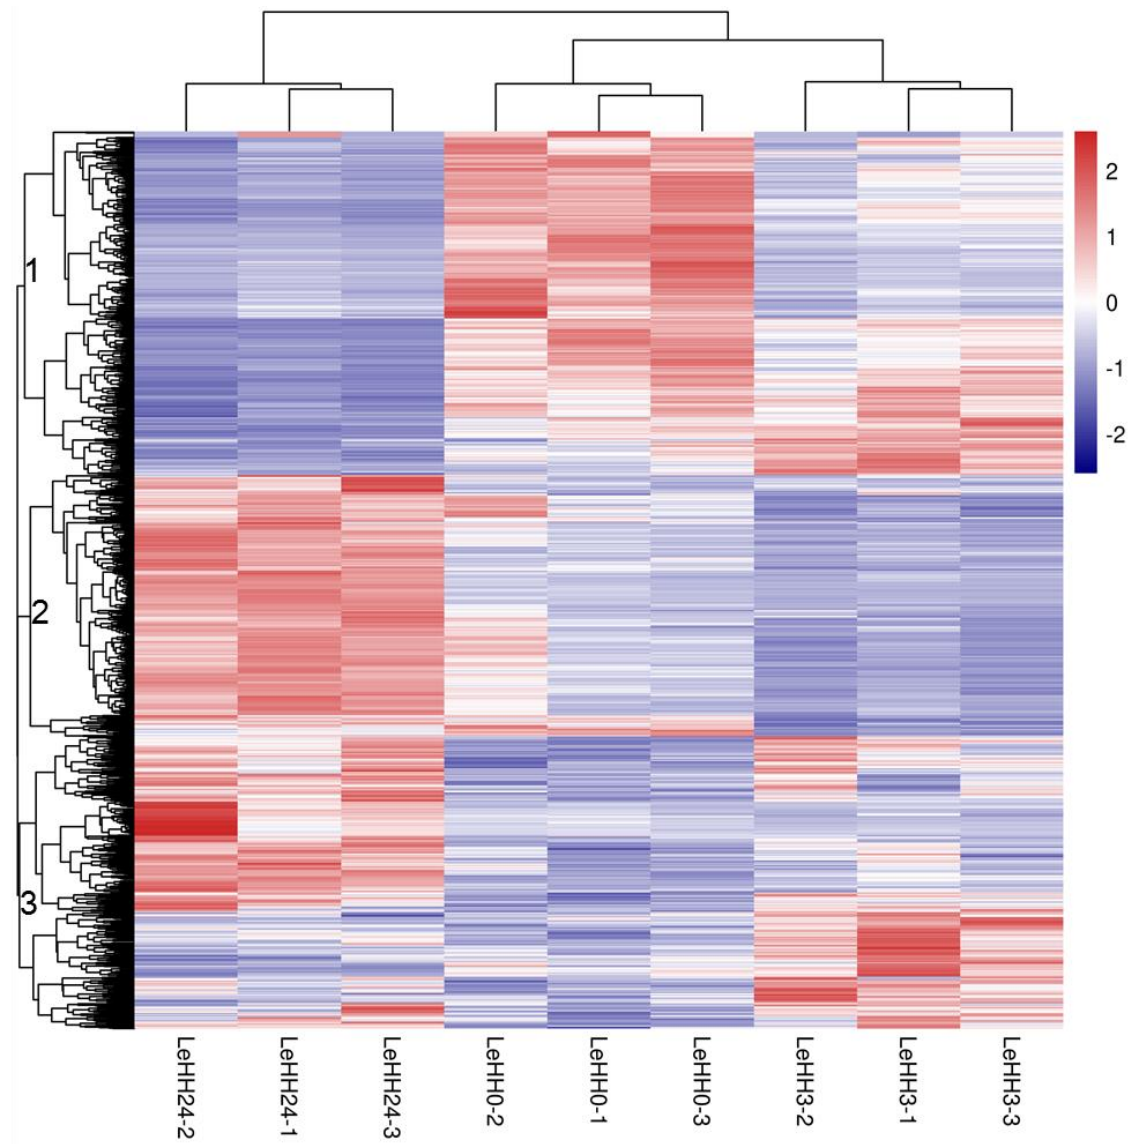

**Figure S5 Hierarchical clustering of all DEGs.** Red indicates genes with up-regulated expression, and blue indicates genes with down-regulated expression.

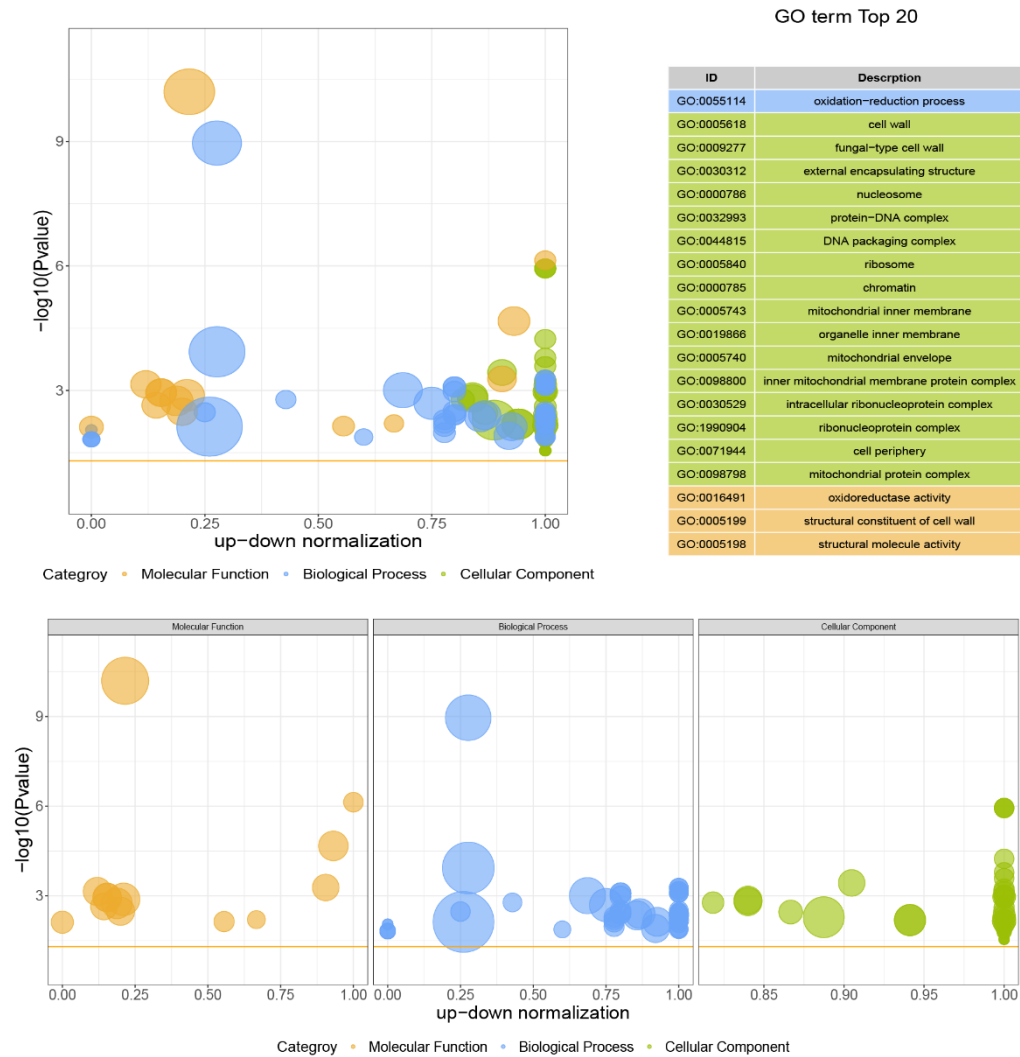

**Figure S6 GO enrichment of DEGs in LeHH24h vs. LeHH0h.**

The above figure uses two forms of bubble charts to show the results of GO enrichment analysis. The ordinate is  $-\log_{10}(\text{Pvalue})$ . The abscissa is the up-down normalization value (the value of up-regulated gene number minus that of down-regulated gene number ratio to all DEGs). GeneCount is represented by the size of the point; the orange line in the figure represents the threshold of  $p = 0.05$ . The right side of a is the list of the top 20 GO terms, and different colours represent different ontologies.

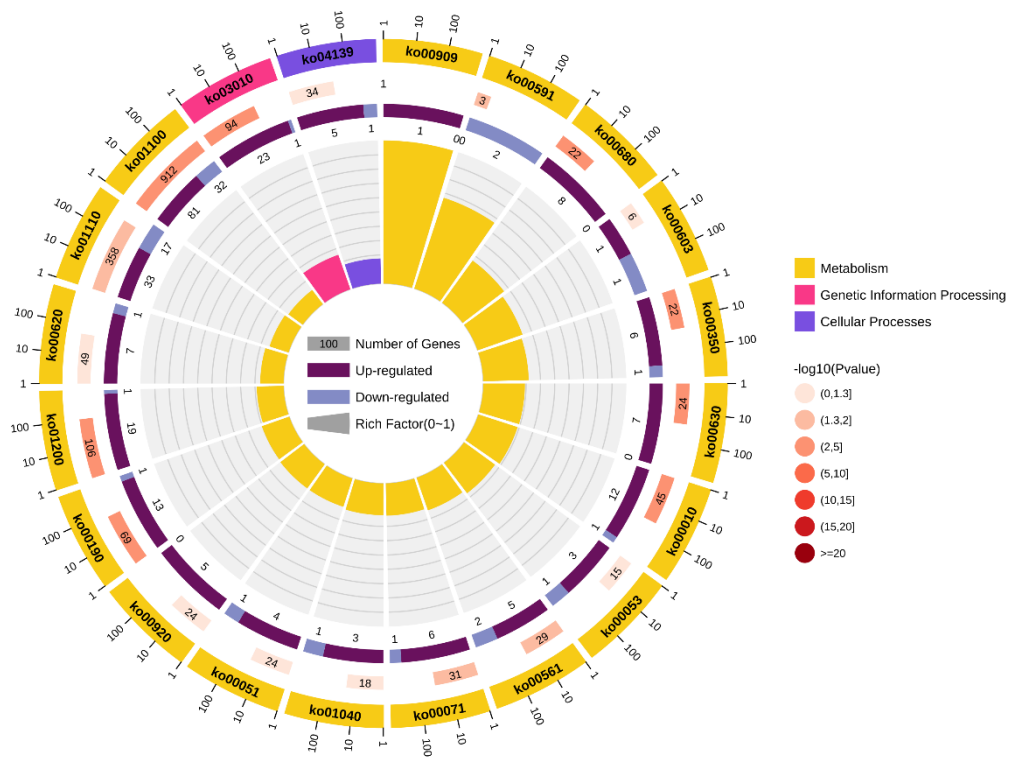

**Figure S7 KEGG enrichment of DEGs in LeHH24h vs. LeHH0h.**

Yellow label indicates metabolism class; magenta label indicates genetic information processing class; purple label indicates cellular process class. The outer ring indicates the top 20 KEGG terms, and the number of genes is indicated on the outer circle. The second ring indicates the number of the genes in the genome background and p-values for the enrichment of syntenic genes for the specified biological process. The third ring indicates the number of up-regulated and down-regulated genes. Red represents the number of up-regulated genes, and blue represents the number of down-regulated genes. The fourth circle indicates the enrichment factor of each KEGG term.

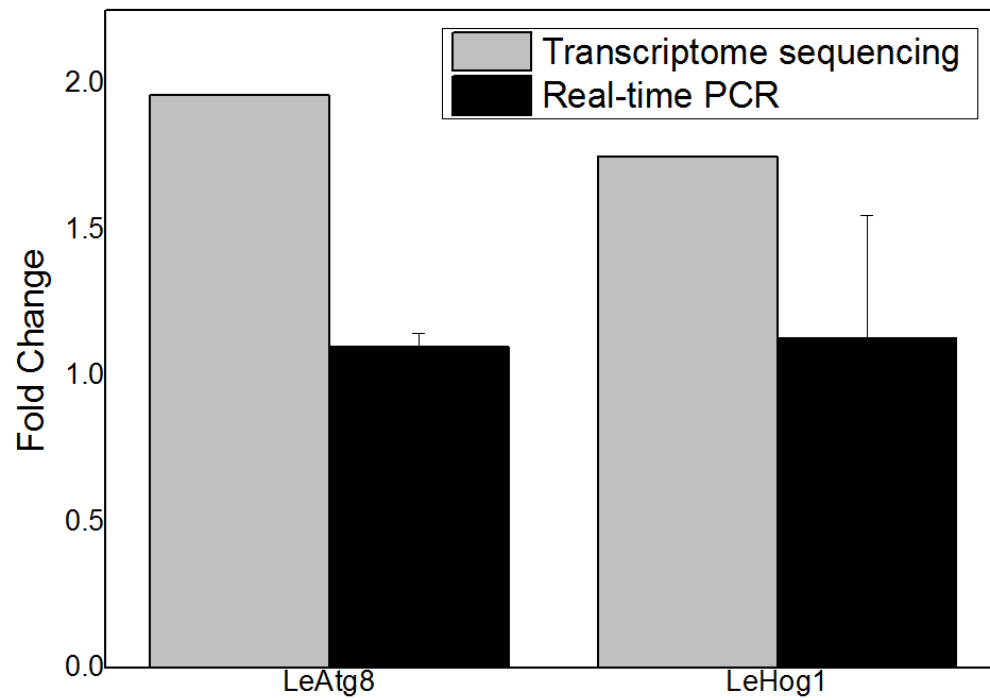

**Figure S8 Validation of the expression of *LeAtg8* and *LeHog1* in LeHH24h vs. LeHH0h using RT-qPCR.**



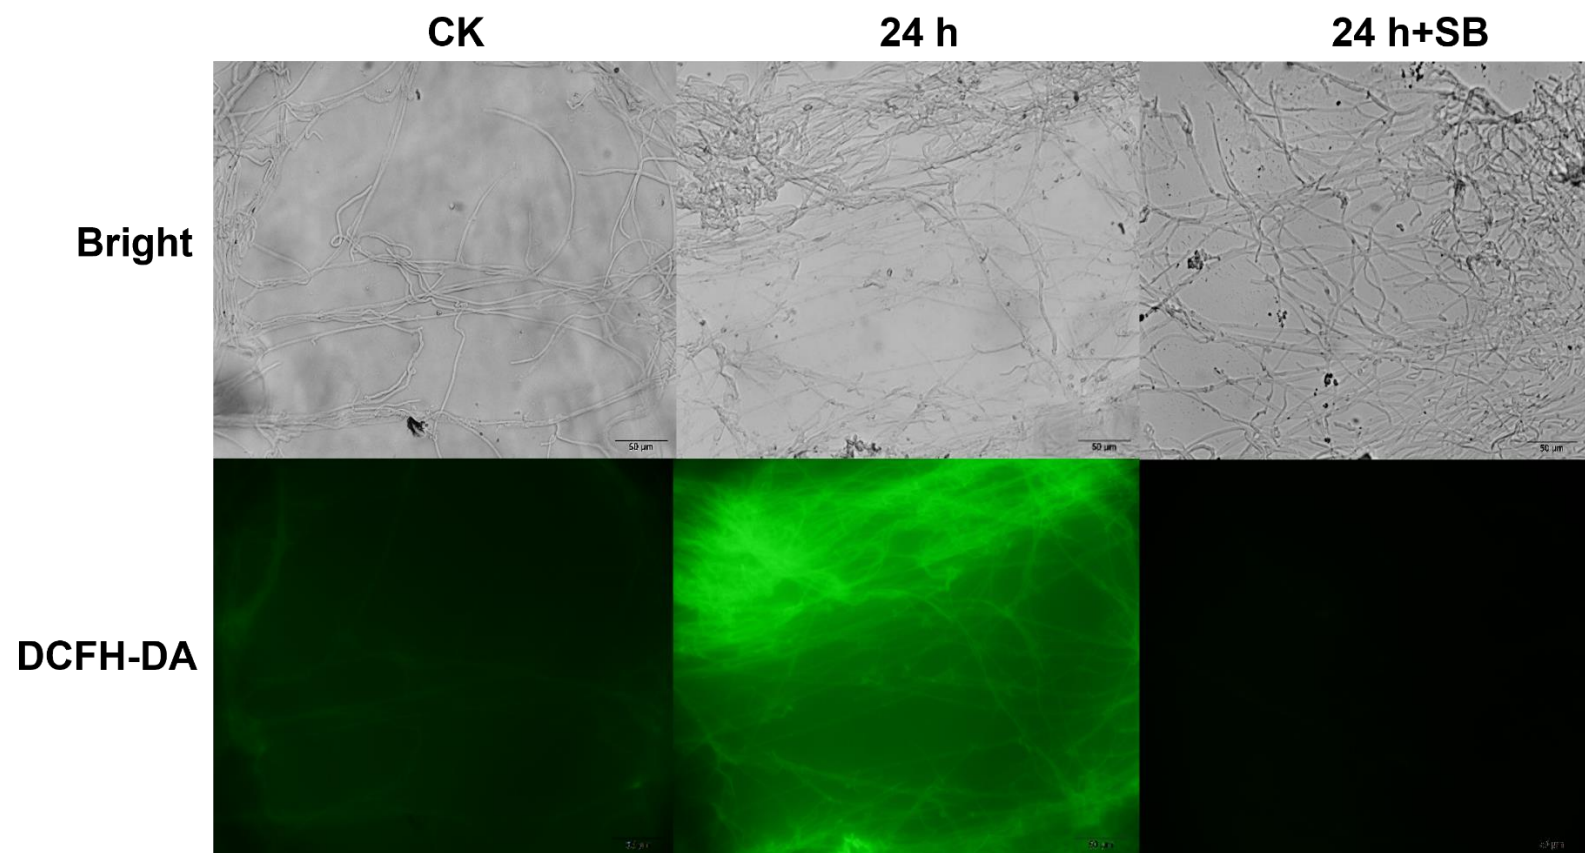

**Figure S9 DCFH-DA staining marked the reactive oxygen species (ROS) content of hyphae under control, 24 h H<sub>2</sub>O<sub>2</sub> treatment, and 24 h H<sub>2</sub>O<sub>2</sub> inhibition with SB203580.**



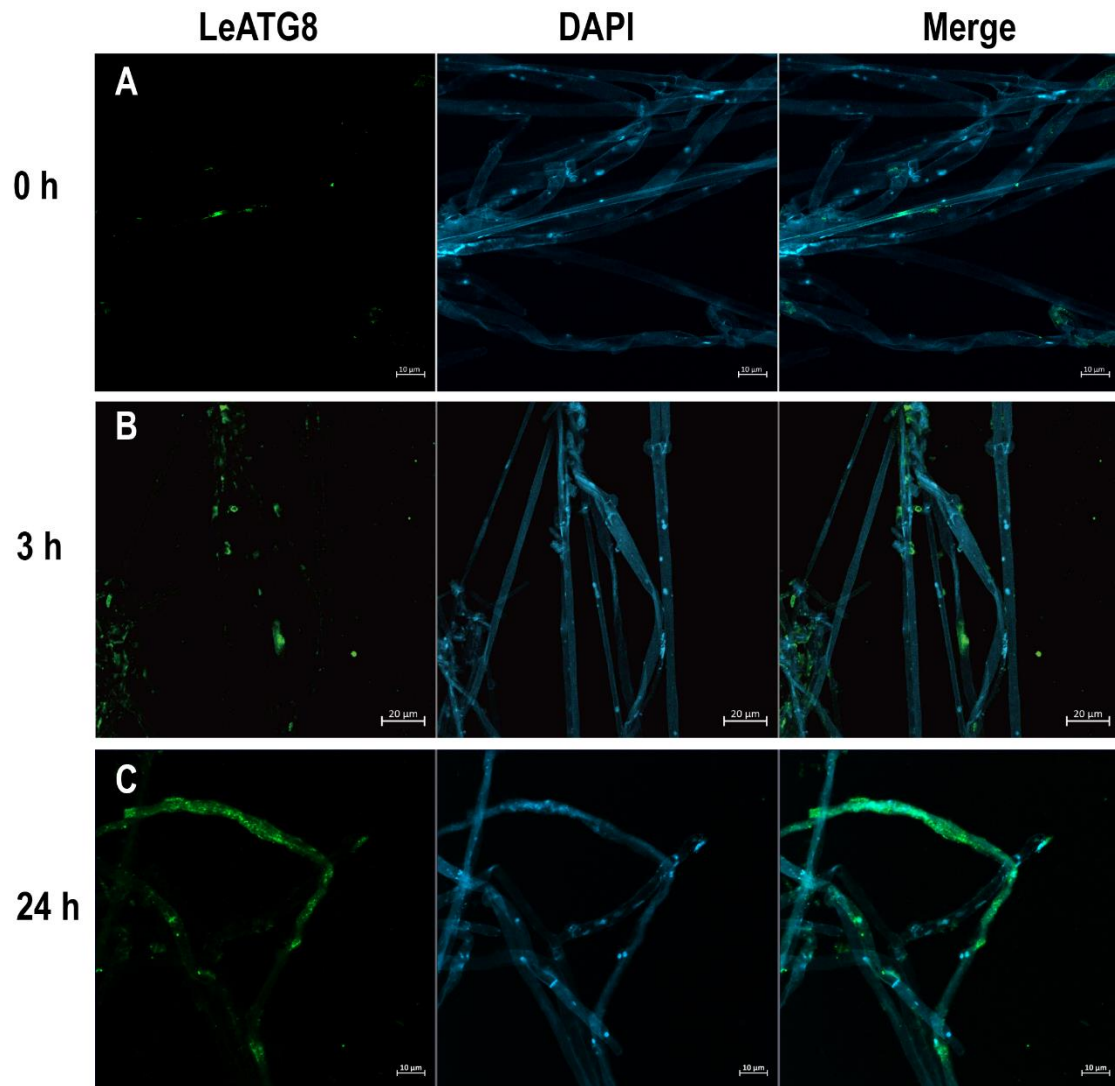

**Figure S10 Subcellular localisation of LeATG8 in mycelia treated with 100  $\mu$ M  $H_2O_2$ .**

(A) Immunofluorescence of LeATG8-labelled (green) and DAPI-stained (blue) mycelia after 0 h treatment.

(B) Immunofluorescence of LeATG8-labelled (green) and DAPI-stained (blue) mycelia after 3 h treatment.

(C) Immunofluorescence of LeATG8-labelled (green) and DAPI-stained (blue) mycelia after 24 h treatment.

**Table S1 Data summary of RNA-seq**

| <b>sample</b>   | <b>raw_reads</b> | <b>clean_reads</b> | <b>clean_bases</b> | <b>error_rate</b> | <b>Q20(%)<sup>a</sup></b> | <b>Q30(%)<sup>b</sup></b> | <b>GC_pct</b> |
|-----------------|------------------|--------------------|--------------------|-------------------|---------------------------|---------------------------|---------------|
| <b>LeC1_1</b>   | 43100600         | 42305864           | 6.35G              | 0.02              | 98.12                     | 94.66                     | 48.76         |
| <b>LeC1_2</b>   | 46298694         | 45450024           | 6.82G              | 0.02              | 98.24                     | 94.92                     | 48.5          |
| <b>LeC1_3</b>   | 45594734         | 44563200           | 6.68G              | 0.02              | 98.35                     | 95.16                     | 48.5          |
| <b>LeHH3_1</b>  | 40431926         | 39402522           | 5.91G              | 0.02              | 98.34                     | 95.14                     | 48.8          |
| <b>LeHH3_2</b>  | 41019206         | 39876902           | 5.98G              | 0.02              | 98.62                     | 95.8                      | 48.7          |
| <b>LeHH3_3</b>  | 42045136         | 41030946           | 6.15G              | 0.02              | 98.37                     | 95.25                     | 48.85         |
| <b>LeHH24_1</b> | 46866462         | 45408894           | 6.81G              | 0.02              | 98.37                     | 95.16                     | 48.7          |
| <b>LeHH24_2</b> | 42659912         | 41867916           | 6.28G              | 0.02              | 98.15                     | 94.78                     | 48.63         |
| <b>LeHH24_3</b> | 45336476         | 44450514           | 6.67G              | 0.02              | 98.56                     | 95.31                     | 48.53         |

**Table S2 Summary of clean reads mapped to reference genome**

| <b>Sample name</b> | <b>Total reads</b> | <b>Total mapped</b> | <b>Multiple mapped</b> | <b>Uniquely mapped</b> | <b>Read-1</b>    | <b>Read-2</b>    |
|--------------------|--------------------|---------------------|------------------------|------------------------|------------------|------------------|
| <b>LeC1_1</b>      | 42305864           | 37620546(88.93%)    | 36967948(87.38%)       | 652598(1.54%)          | 18584919(43.93%) | 18383029(43.45%) |
| <b>LeC1_2</b>      | 45450024           | 40309563(88.69%)    | 39586475(87.1%)        | 723088(1.59%)          | 19871732(43.72%) | 19714743(43.38%) |
| <b>LeC1_3</b>      | 44563200           | 39203048(87.97%)    | 38445884(86.27%)       | 757164(1.7%)           | 19276298(43.26%) | 19169586(43.02%) |
| <b>LeHH3_1</b>     | 42740668           | 38375777(89.79%)    | 37646498(88.08%)       | 729279(1.71%)          | 18886745(44.19%) | 18759753(43.89%) |
| <b>LeHH3_2</b>     | 42238460           | 37920210(89.78%)    | 37278620(88.26%)       | 641590(1.52%)          | 18694865(44.26%) | 18583755(44.0%)  |
| <b>LeHH3_3</b>     | 45925830           | 41075073(89.44%)    | 40110567(87.34%)       | 964506(2.1%)           | 20140656(43.85%) | 19969911(43.48%) |
| <b>LeHH24_1</b>    | 39402522           | 35396509(89.83%)    | 34863762(88.48%)       | 532747(1.35%)          | 17494902(44.4%)  | 17368860(44.08%) |
| <b>LeHH24_2</b>    | 39876902           | 35570223(89.2%)     | 34985351(87.73%)       | 584872(1.47%)          | 17499301(43.88%) | 17486050(43.85%) |
| <b>LeHH24_3</b>    | 41030946           | 36799579(89.69%)    | 36156647(88.12%)       | 642932(1.57%)          | 18127679(44.18%) | 18028968(43.94%) |

**Table S3 DEG lists of LeHH3h vs LeHH0h**

| <b>gene</b>       | <b>log2FoldChange</b> | <b>pvalue</b> |
|-------------------|-----------------------|---------------|
| gene-Led00038-sp3 | -0.905992319          | 0.00702816    |
| gene-Led00044-sp3 | 1.224278936           | 0.000293164   |
| gene-Led00080-sp3 | -0.84923915           | 5.40E-05      |
| gene-Led00095-sp3 | 2.885115079           | 2.55E-15      |
| gene-Led00100-sp3 | 0.554838203           | 0.004863809   |
| gene-Led00115-sp3 | -0.777072537          | 0.00044469    |
| gene-Led00127-sp3 | -1.692814351          | 2.44E-12      |
| gene-Led00165-sp3 | 0.66509999            | 0.000962843   |
| gene-Led00180-sp3 | -0.699544536          | 0.001090459   |
| gene-Led00246-sp3 | 0.361687854           | 0.006713128   |
| gene-Led00247-sp3 | -0.353592446          | 0.009184156   |
| gene-Led00250-sp3 | 0.713418516           | 0.001012739   |
| gene-Led00287-sp3 | 0.431836153           | 0.009502698   |
| gene-Led00318-sp3 | 0.908801928           | 2.26E-07      |
| gene-Led00326-sp3 | -1.527498061          | 3.85E-07      |
| gene-Led00345-sp3 | -0.835103771          | 0.000148258   |
| gene-Led00346-sp3 | 0.563827413           | 0.000527416   |
| gene-Led00428-sp3 | 0.415600444           | 0.006052967   |
| gene-Led00433-sp3 | -0.881403263          | 0.004471958   |
| gene-Led00446-sp3 | 0.501326509           | 0.000821901   |
| gene-Led00449-sp3 | 0.597080829           | 0.003630372   |
| gene-Led00458-sp3 | 0.472259709           | 0.006332523   |
| gene-Led00484-sp3 | 0.528061793           | 0.001677093   |
| gene-Led00487-sp3 | 0.569573127           | 0.000676656   |
| gene-Led00488-sp3 | 0.455115982           | 0.005897278   |
| gene-Led00503-sp3 | -0.528103383          | 0.000943759   |
| gene-Led00522-sp3 | 0.602868946           | 0.000215024   |
| gene-Led00534-sp3 | -2.770573217          | 3.48E-15      |
| gene-Led00553-sp3 | -1.964963833          | 2.84E-15      |
| gene-Led00583-sp3 | 0.492586251           | 0.008319159   |
| gene-Led00588-sp3 | -2.128996207          | 2.23E-22      |
| gene-Led00610-sp3 | 0.516385825           | 0.006181292   |
| gene-Led00622-sp3 | 1.928554104           | 0.00027588    |
| gene-Led00647-sp3 | 1.708639016           | 9.03E-12      |
| gene-Led00649-sp3 | 0.840937052           | 0.000154492   |
| gene-Led00655-sp3 | 0.673506883           | 0.001214402   |
| gene-Led00680-sp3 | -2.253411996          | 2.42E-31      |
| gene-Led00683-sp3 | -1.088912357          | 0.00018701    |
| gene-Led00702-sp3 | 0.56578008            | 0.002350954   |
| gene-Led00748-sp3 | 0.417709998           | 0.007816427   |
| gene-Led00751-sp3 | 0.411112676           | 0.008800512   |

|                   |              |             |
|-------------------|--------------|-------------|
| gene-Led00753-sp3 | 0.579460701  | 0.001120262 |
| gene-Led00763-sp3 | 0.523424806  | 0.001615587 |
| gene-Led00803-sp3 | -0.657748087 | 0.000301205 |
| gene-Led00828-sp3 | -0.772937027 | 0.000302475 |
| gene-Led00838-sp3 | 0.497464449  | 0.007305582 |
| gene-Led00878-sp3 | -1.717705544 | 0.0000107   |
| gene-Led00899-sp3 | 0.455164045  | 0.003261332 |
| gene-Led00910-sp3 | 0.393448692  | 0.004621652 |
| gene-Led00920-sp3 | 0.588697504  | 0.003697597 |
| gene-Led00929-sp3 | -1.568631823 | 1.00E-07    |
| gene-Led00943-sp3 | -0.900984607 | 1.24E-05    |
| gene-Led00981-sp3 | -0.646324231 | 0.003171396 |
| gene-Led01058-sp3 | 1.512164869  | 0.002120197 |
| gene-Led01075-sp3 | 0.592591493  | 0.001132892 |
| gene-Led01098-sp3 | -0.65840667  | 0.000979472 |
| gene-Led01128-sp3 | 0.467760692  | 0.002954987 |
| gene-Led01148-sp3 | -2.077235426 | 0.0000312   |
| gene-Led01207-sp3 | 0.471944502  | 0.004711043 |
| gene-Led01215-sp3 | 0.512411991  | 0.001813607 |
| gene-Led01218-sp3 | 1.706177399  | 1.96E-15    |
| gene-Led01260-sp3 | 0.71147662   | 0.001290371 |
| gene-Led01274-sp3 | -0.545757821 | 0.000830247 |
| gene-Led01295-sp3 | 0.515742065  | 0.008793046 |
| gene-Led01321-sp3 | -0.716905089 | 0.00881039  |
| gene-Led01338-sp3 | 0.412768633  | 0.008375905 |
| gene-Led01343-sp3 | 0.968833069  | 1.91E-06    |
| gene-Led01347-sp3 | -1.158906975 | 0.000146736 |
| gene-Led01372-sp3 | 0.460310923  | 0.005335666 |
| gene-Led01435-sp3 | 0.940626476  | 0.000176622 |
| gene-Led01444-sp3 | 0.376449756  | 0.0066546   |
| gene-Led01468-sp3 | -0.752707886 | 0.005544141 |
| gene-Led01475-sp3 | -0.845748222 | 0.005585884 |
| gene-Led01527-sp3 | 0.593277961  | 0.001379366 |
| gene-Led01530-sp3 | 0.519794123  | 0.00131829  |
| gene-Led01536-sp3 | 1.568096041  | 3.84E-14    |
| gene-Led01538-sp3 | -1.409794555 | 2.78E-05    |
| gene-Led01543-sp3 | 0.532920756  | 0.001351585 |
| gene-Led01556-sp3 | -1.153278961 | 0.002644866 |
| gene-Led01568-sp3 | 0.731097593  | 0.001745897 |
| gene-Led01573-sp3 | 0.363461075  | 0.009138976 |
| gene-Led01609-sp3 | -1.474334129 | 1.03E-09    |
| gene-Led01612-sp3 | -3.36720449  | 2.26E-27    |
| gene-Led01618-sp3 | 0.542661562  | 0.000622    |
| gene-Led01619-sp3 | 0.651761068  | 0.000399337 |

|                   |              |             |
|-------------------|--------------|-------------|
| gene-Led01636-sp3 | 0.624402142  | 0.002360445 |
| gene-Led01643-sp3 | 0.541079037  | 0.001974068 |
| gene-Led01665-sp3 | 0.663581678  | 1.01E-04    |
| gene-Led01667-sp3 | 0.595214525  | 0.00220211  |
| gene-Led01674-sp3 | 0.863763944  | 1.67E-06    |
| gene-Led01687-sp3 | -1.197971983 | 0.0001264   |
| gene-Led01698-sp3 | -1.296363652 | 3.37E-06    |
| gene-Led01699-sp3 | 0.385330283  | 0.00906599  |
| gene-Led01700-sp3 | 0.64980853   | 0.000139282 |
| gene-Led01707-sp3 | 0.807083149  | 8.68E-07    |
| gene-Led01719-sp3 | 1.341407114  | 0.002757787 |
| gene-Led01720-sp3 | 0.859461087  | 0.000146743 |
| gene-Led01721-sp3 | 0.414837473  | 0.004698725 |
| gene-Led01752-sp3 | 0.555916109  | 0.00210482  |
| gene-Led01757-sp3 | 0.594677289  | 0.002020359 |
| gene-Led01764-sp3 | -2.26707273  | 2.49E-11    |
| gene-Led01765-sp3 | -1.280841403 | 0.004763039 |
| gene-Led01821-sp3 | 1.263361825  | 0.000514036 |
| gene-Led01831-sp3 | -2.174222875 | 2.17E-13    |
| gene-Led01835-sp3 | -0.768440264 | 0.00614192  |
| gene-Led01861-sp3 | 0.511101536  | 0.0055287   |
| gene-Led01906-sp3 | 0.518074593  | 0.002061308 |
| gene-Led01938-sp3 | -1.712275961 | 9.56E-07    |
| gene-Led01951-sp3 | -1.982732825 | 0.0000556   |
| gene-Led01960-sp3 | 1.293693699  | 5.22E-09    |
| gene-Led01961-sp3 | -1.127110125 | 5.50E-06    |
| gene-Led01968-sp3 | -0.733066019 | 0.001496261 |
| gene-Led01978-sp3 | -1.567753224 | 6.03E-07    |
| gene-Led02006-sp3 | 0.575295116  | 0.000255131 |
| gene-Led02046-sp3 | 0.579417946  | 0.000199804 |
| gene-Led02047-sp3 | 0.70243331   | 2.22E-05    |
| gene-Led02053-sp3 | 0.543207722  | 0.003552919 |
| gene-Led02063-sp3 | 0.908967779  | 9.74E-05    |
| gene-Led02086-sp3 | 0.681958011  | 6.16E-05    |
| gene-Led02107-sp3 | 0.494058921  | 0.008539402 |
| gene-Led02123-sp3 | 0.485767989  | 0.00355998  |
| gene-Led02127-sp3 | 0.457795424  | 0.003521464 |
| gene-Led02188-sp3 | -1.744664915 | 0.000243043 |
| gene-Led02200-sp3 | -0.756715132 | 0.004562518 |
| gene-Led02203-sp3 | 0.545331674  | 0.000711931 |
| gene-Led02238-sp3 | 1.219892412  | 1.10E-08    |
| gene-Led02239-sp3 | 0.615896218  | 0.002068042 |
| gene-Led02347-sp3 | 1.211958552  | 0.0000907   |
| gene-Led02368-sp3 | -1.517089991 | 1.88E-09    |

|                   |              |             |
|-------------------|--------------|-------------|
| gene-Led02374-sp3 | 0.668269905  | 0.000562922 |
| gene-Led02383-sp3 | 0.420208451  | 0.008225588 |
| gene-Led02387-sp3 | 0.47033205   | 0.009326515 |
| gene-Led02397-sp3 | -1.526527406 | 9.74E-07    |
| gene-Led02438-sp3 | -3.349641927 | 9.25E-16    |
| gene-Led02486-sp3 | 0.477393524  | 0.00658877  |
| gene-Led02526-sp3 | 0.596967916  | 0.001711357 |
| gene-Led02550-sp3 | -0.924320036 | 0.000874888 |
| gene-Led02625-sp3 | -2.845216356 | 2.51E-15    |
| gene-Led02639-sp3 | 0.710818403  | 2.62E-05    |
| gene-Led02640-sp3 | 1.366819707  | 0.004151835 |
| gene-Led02648-sp3 | 0.651766439  | 0.000460901 |
| gene-Led02690-sp3 | 2.156387369  | 1.11E-09    |
| gene-Led02705-sp3 | 0.50945261   | 0.001271566 |
| gene-Led02746-sp3 | -1.004523039 | 1.69E-06    |
| gene-Led02753-sp3 | 0.569436985  | 0.002203103 |
| gene-Led02755-sp3 | 0.688137767  | 0.00016451  |
| gene-Led02776-sp3 | 0.572515178  | 0.001902764 |
| gene-Led02777-sp3 | 0.545489516  | 0.000544514 |
| gene-Led02787-sp3 | 0.477353608  | 0.00304617  |
| gene-Led02838-sp3 | 0.595777766  | 0.000665401 |
| gene-Led02883-sp3 | -1.400712251 | 0.0000916   |
| gene-Led02903-sp3 | -0.490564537 | 0.007707069 |
| gene-Led02908-sp3 | 0.534814018  | 0.001151026 |
| gene-Led02922-sp3 | 0.591587722  | 0.009788794 |
| gene-Led02941-sp3 | 0.557803639  | 0.000750812 |
| gene-Led02958-sp3 | 0.58419066   | 0.000644468 |
| gene-Led02981-sp3 | 0.667114948  | 0.000147988 |
| gene-Led02988-sp3 | 0.399180446  | 0.008247062 |
| gene-Led02995-sp3 | 0.414013415  | 0.005863489 |
| gene-Led03000-sp3 | 3.27898275   | 0.000000469 |
| gene-Led03018-sp3 | -0.62339642  | 0.001471208 |
| gene-Led03030-sp3 | 0.935442366  | 0.000186217 |
| gene-Led03038-sp3 | 0.598022679  | 0.000336225 |
| gene-Led03044-sp3 | 0.469306005  | 0.004742735 |
| gene-Led03047-sp3 | 0.473982602  | 0.005532338 |
| gene-Led03048-sp3 | 0.406485221  | 0.007248918 |
| gene-Led03053-sp3 | 0.846170989  | 1.18E-05    |
| gene-Led03053-sp3 | 0.861325419  | 6.62E-05    |
| gene-Led03054-sp3 | 0.706251678  | 1.03E-05    |
| gene-Led03076-sp3 | 1.318526425  | 2.80E-08    |
| gene-Led03111-sp3 | 0.446312671  | 0.003951701 |
| gene-Led03207-sp3 | 0.490103737  | 0.004455711 |
| gene-Led03208-sp3 | 1.285163514  | 2.58E-09    |



|                   |              |             |
|-------------------|--------------|-------------|
| gene-Led03227-sp3 | 0.568008426  | 0.004224649 |
| gene-Led03250-sp3 | -0.842926009 | 0.003252644 |
| gene-Led03256-sp3 | 0.399616729  | 0.00306749  |
| gene-Led03324-sp3 | 0.337602449  | 0.009160127 |
| gene-Led03328-sp3 | -2.187555986 | 1.34E-09    |
| gene-Led03375-sp3 | 0.412810175  | 0.009681925 |
| gene-Led03423-sp3 | 0.843093034  | 0.001188569 |
| gene-Led03434-sp3 | -1.717407578 | 2.20E-05    |
| gene-Led03440-sp3 | 0.74081686   | 0.00261754  |
| gene-Led03446-sp3 | 0.550041101  | 0.000384089 |
| gene-Led03464-sp3 | 0.859471334  | 0.0000999   |
| gene-Led03466-sp3 | -1.366829164 | 0.0000178   |
| gene-Led03481-sp3 | -0.90457335  | 0.001942902 |
| gene-Led03484-sp3 | -1.471479453 | 0.0000772   |
| gene-Led03566-sp3 | 0.47012557   | 0.005034201 |
| gene-Led03576-sp3 | -0.686283091 | 0.001229902 |
| gene-Led03580-sp3 | 0.77359489   | 5.28E-05    |
| gene-Led03596-sp3 | -0.676460453 | 0.001152268 |
| gene-Led03597-sp3 | 0.627398205  | 0.001124755 |
| gene-Led03620-sp3 | 0.74472172   | 1.01E-04    |
| gene-Led03682-sp3 | 0.539623396  | 0.006641355 |
| gene-Led03763-sp3 | 0.690976498  | 0.001372273 |
| gene-Led03765-sp3 | -0.964090169 | 3.74E-06    |
| gene-Led03786-sp3 | 0.918924444  | 0.003259573 |
| gene-Led03830-sp3 | 0.907649554  | 2.62E-06    |
| gene-Led03842-sp3 | -2.27609781  | 3.57E-10    |
| gene-Led03887-sp3 | -1.027656213 | 1.41E-06    |
| gene-Led03889-sp3 | 0.624267598  | 0.000339744 |
| gene-Led03890-sp3 | 0.568506026  | 0.000578855 |
| gene-Led03896-sp3 | -1.081206054 | 0.000470782 |
| gene-Led03897-sp3 | -1.831417068 | 6.09E-14    |
| gene-Led03898-sp3 | -1.549870075 | 1.23E-18    |
| gene-Led03900-sp3 | 0.46245791   | 0.00789425  |
| gene-Led03907-sp3 | -1.308403686 | 0.001451725 |
| gene-Led03916-sp3 | 1.74554897   | 0.000928318 |
| gene-Led03927-sp3 | -0.627262671 | 0.007075136 |
| gene-Led03966-sp3 | 0.392513527  | 0.00975904  |
| gene-Led03994-sp3 | 3.330407912  | 0.001260875 |
| gene-Led03997-sp3 | 0.637819087  | 0.000375196 |
| gene-Led04039-sp3 | 0.471647508  | 0.006165938 |
| gene-Led04040-sp3 | 0.99289736   | 1.69E-07    |
| gene-Led04060-sp3 | 0.468825059  | 0.003765726 |
| gene-Led04069-sp3 | 0.634617276  | 0.000723521 |
| gene-Led04098-sp3 | 0.549369842  | 0.002666435 |

|                   |              |             |
|-------------------|--------------|-------------|
| gene-Led04102-sp3 | 1.954369487  | 0.00206219  |
| gene-Led04106-sp3 | 0.407276702  | 0.003502997 |
| gene-Led04107-sp3 | 0.542177756  | 0.000674746 |
| gene-Led04121-sp3 | -0.559496778 | 0.002727986 |
| gene-Led04132-sp3 | 0.44903468   | 0.002962063 |
| gene-Led04181-sp3 | -0.6672486   | 0.008368495 |
| gene-Led04243-sp3 | 0.676269651  | 0.000158754 |
| gene-Led04279-sp3 | -2.19442334  | 8.35E-19    |
| gene-Led04285-sp3 | -0.775245746 | 0.000192096 |
| gene-Led04286-sp3 | 0.526797139  | 0.001497648 |
| gene-Led04298-sp3 | 0.658524836  | 8.53E-05    |
| gene-Led04303-sp3 | 1.117273189  | 1.31E-07    |
| gene-Led04322-sp3 | 0.80006066   | 6.04E-06    |
| gene-Led04323-sp3 | 0.756251269  | 1.32E-06    |
| gene-Led04345-sp3 | -2.105219312 | 1.58E-09    |
| gene-Led04362-sp3 | 0.484198591  | 0.006766338 |
| gene-Led04364-sp3 | 0.442020518  | 0.003649561 |
| gene-Led04373-sp3 | -0.680087983 | 0.002003698 |
| gene-Led04399-sp3 | 0.725228741  | 0.003808327 |
| gene-Led04417-sp3 | -0.464904818 | 0.008517764 |
| gene-Led04429-sp3 | -0.623740588 | 0.000335308 |
| gene-Led04483-sp3 | -3.007247873 | 0.000000111 |
| gene-Led04484-sp3 | -1.674190174 | 0.001215107 |
| gene-Led04499-sp3 | -0.937482603 | 0.000811646 |
| gene-Led04523-sp3 | 0.482654662  | 0.002952892 |
| gene-Led04590-sp3 | -0.785562858 | 0.004115885 |
| gene-Led04617-sp3 | -2.067632404 | 5.05E-10    |
| gene-Led04637-sp3 | 0.508634421  | 0.0020094   |
| gene-Led04649-sp3 | -0.873953334 | 0.001907518 |
| gene-Led04656-sp3 | 0.570711656  | 0.001976843 |
| gene-Led04683-sp3 | -1.450363864 | 1.74E-08    |
| gene-Led04748-sp3 | -0.754671594 | 0.005301498 |
| gene-Led04755-sp3 | 0.443574767  | 0.009763024 |
| gene-Led04763-sp3 | -0.757712326 | 2.04E-05    |
| gene-Led04796-sp3 | -0.928486029 | 0.000885528 |
| gene-Led04806-sp3 | -0.833016563 | 0.001674533 |
| gene-Led04883-sp3 | -0.85069637  | 0.004125352 |
| gene-Led04936-sp3 | 0.557173513  | 0.001627985 |
| gene-Led04949-sp3 | -0.77348574  | 1.51E-05    |
| gene-Led04975-sp3 | -1.071750886 | 4.26E-06    |
| gene-Led04976-sp3 | -1.219412626 | 0.001658525 |
| gene-Led05017-sp3 | -0.767794697 | 0.008612855 |
| gene-Led05019-sp3 | 0.442905541  | 0.007285099 |
| gene-Led05022-sp3 | -1.303125923 | 5.27E-06    |

|                   |              |             |
|-------------------|--------------|-------------|
| gene-Led05029-sp3 | 0.502179029  | 0.002348421 |
| gene-Led05031-sp3 | 1.478860387  | 4.68E-06    |
| gene-Led05034-sp3 | 1.022112166  | 0.000153941 |
| gene-Led05036-sp3 | -1.307535111 | 8.94E-05    |
| gene-Led05063-sp3 | 0.593889203  | 0.009796794 |
| gene-Led05068-sp3 | -2.641835988 | 6.38E-08    |
| gene-Led05069-sp3 | 0.466630457  | 0.006936527 |
| gene-Led05085-sp3 | 0.545733531  | 0.000475515 |
| gene-Led05089-sp3 | 0.410938354  | 0.00950963  |
| gene-Led05095-sp3 | -0.548479398 | 0.00305703  |
| gene-Led05130-sp3 | -0.693027392 | 0.000948236 |
| gene-Led05133-sp3 | 1.016820886  | 0.000110886 |
| gene-Led05164-sp3 | -0.71481558  | 0.009108252 |
| gene-Led05200-sp3 | 0.624156882  | 0.004252677 |
| gene-Led05219-sp3 | -1.231222709 | 3.84E-06    |
| gene-Led05248-sp3 | -1.182859602 | 1.49E-05    |
| gene-Led05248-sp3 | 0.722975582  | 0.00175655  |
| gene-Led05272-sp3 | 0.519821381  | 0.002173396 |
| gene-Led05273-sp3 | 1.311687737  | 3.08E-08    |
| gene-Led05300-sp3 | 1.80501089   | 7.99E-11    |
| gene-Led05321-sp3 | 0.560707427  | 0.000992326 |
| gene-Led05328-sp3 | -1.023263529 | 4.23E-05    |
| gene-Led05331-sp3 | 0.629539696  | 0.000550893 |
| gene-Led05332-sp3 | -0.894666639 | 0.000879153 |
| gene-Led05462-sp3 | -0.649649844 | 0.000122202 |
| gene-Led05501-sp3 | 0.502252592  | 0.002297045 |
| gene-Led05511-sp3 | 0.557482888  | 0.000849661 |
| gene-Led05539-sp3 | 0.675201996  | 0.009067559 |
| gene-Led05558-sp3 | -0.54160672  | 0.006520138 |
| gene-Led05573-sp3 | 0.573899459  | 0.000790667 |
| gene-Led05597-sp3 | 0.649054682  | 0.000326541 |
| gene-Led05629-sp3 | 0.435999718  | 0.004216441 |
| gene-Led05652-sp3 | 0.495026239  | 0.002429828 |
| gene-Led05686-sp3 | 0.411709737  | 0.007312493 |
| gene-Led05718-sp3 | -1.35960872  | 0.000294444 |
| gene-Led05768-sp3 | 0.508175657  | 0.00144806  |
| gene-Led05778-sp3 | 0.454214173  | 0.004078472 |
| gene-Led05789-sp3 | 0.861770874  | 1.14E-05    |
| gene-Led05795-sp3 | 2.237232525  | 0.00000947  |
| gene-Led05802-sp3 | 0.596880121  | 0.001562188 |
| gene-Led05804-sp3 | 0.618613751  | 0.000487095 |
| gene-Led05807-sp3 | 0.666153571  | 0.000565341 |
| gene-Led05808-sp3 | 1.288114747  | 9.70E-10    |
| gene-Led05940-sp3 | -0.570633452 | 0.003125862 |

|                   |              |             |
|-------------------|--------------|-------------|
| gene-Led05961-sp3 | 2.470863441  | 0.001110602 |
| gene-Led06015-sp3 | 1.047035051  | 0.002226665 |
| gene-Led06029-sp3 | 1.261381248  | 1.02E-06    |
| gene-Led06034-sp3 | 0.913040084  | 0.0000992   |
| gene-Led06035-sp3 | 0.935077586  | 0.000325321 |
| gene-Led06059-sp3 | 1.774794063  | 8.65E-15    |
| gene-Led06060-sp3 | 0.821905881  | 3.24E-06    |
| gene-Led06083-sp3 | -0.598028706 | 0.004076242 |
| gene-Led06149-sp3 | -2.499983789 | 3.57E-25    |
| gene-Led06150-sp3 | -2.159316103 | 1.99E-18    |
| gene-Led06164-sp3 | 0.591542417  | 0.006062193 |
| gene-Led06253-sp3 | -1.025767576 | 3.80E-10    |
| gene-Led06260-sp3 | -0.686377824 | 0.005321286 |
| gene-Led06278-sp3 | 0.586206967  | 0.001768791 |
| gene-Led06279-sp3 | 0.570198374  | 0.00542917  |
| gene-Led06338-sp3 | 0.821878147  | 0.000506561 |
| gene-Led06351-sp3 | -0.846911264 | 0.002228649 |
| gene-Led06363-sp3 | 0.418075153  | 0.003703474 |
| gene-Led06365-sp3 | 0.717835505  | 0.000406405 |
| gene-Led06391-sp3 | 0.51141922   | 0.003213766 |
| gene-Led06448-sp3 | 0.473396045  | 0.009188109 |
| gene-Led06450-sp3 | 0.561724038  | 0.001381735 |
| gene-Led06456-sp3 | -0.900930713 | 0.000187913 |
| gene-Led06460-sp3 | 0.631311925  | 0.000348456 |
| gene-Led06477-sp3 | 1.002329448  | 0.002066935 |
| gene-Led06490-sp3 | 0.409219435  | 0.00589346  |
| gene-Led06497-sp3 | 0.632285386  | 2.36E-05    |
| gene-Led06499-sp3 | -1.303777371 | 0.004948911 |
| gene-Led06500-sp3 | 0.576096361  | 0.003835086 |
| gene-Led06516-sp3 | 0.716776551  | 0.000450631 |
| gene-Led06524-sp3 | -1.007977616 | 7.50E-06    |
| gene-Led06540-sp3 | 0.465176613  | 0.006656611 |
| gene-Led06546-sp3 | -1.187320366 | 0.002008306 |
| gene-Led06552-sp3 | 0.472869081  | 0.001874604 |
| gene-Led06565-sp3 | 0.785698014  | 0.000837605 |
| gene-Led06582-sp3 | -1.002410276 | 1.08E-05    |
| gene-Led06586-sp3 | 0.866540516  | 0.008609514 |
| gene-Led06587-sp3 | 0.42423792   | 0.004258065 |
| gene-Led06601-sp3 | 0.812203839  | 3.91E-06    |
| gene-Led06611-sp3 | 0.549554743  | 0.000682253 |
| gene-Led06632-sp3 | 0.63723538   | 0.000472363 |
| gene-Led06637-sp3 | 0.523098798  | 0.00179398  |
| gene-Led06646-sp3 | 0.767251826  | 3.20E-05    |
| gene-Led06661-sp3 | 0.563002909  | 0.00070752  |

|                   |              |             |
|-------------------|--------------|-------------|
| gene-Led06662-sp3 | 0.59259674   | 0.000359521 |
| gene-Led06674-sp3 | 0.602895325  | 0.000448395 |
| gene-Led06679-sp3 | -0.619255698 | 0.00262941  |
| gene-Led06743-sp3 | 0.497582684  | 0.001875283 |
| gene-Led06804-sp3 | 0.43369247   | 0.00954411  |
| gene-Led06807-sp3 | -0.795192974 | 0.004984331 |
| gene-Led06873-sp3 | -0.831728821 | 1.27E-05    |
| gene-Led06888-sp3 | -0.2140026   | 0.004332404 |
| gene-Led06902-sp3 | 0.432931449  | 0.005306961 |
| gene-Led06911-sp3 | 1.354151029  | 0.000350314 |
| gene-Led06950-sp3 | 0.516139561  | 0.003655779 |
| gene-Led06957-sp3 | -0.748562913 | 0.001172595 |
| gene-Led07002-sp3 | 1.561971565  | 1.21E-08    |
| gene-Led07008-sp3 | -1.216344228 | 1.00E-05    |
| gene-Led07046-sp3 | 0.532685555  | 0.003129974 |
| gene-Led07100-sp3 | -1.612497134 | 1.57E-06    |
| gene-Led07102-sp3 | -2.057218154 | 4.47E-20    |
| gene-Led07143-sp3 | 0.754279265  | 0.000376701 |
| gene-Led07148-sp3 | 1.984772254  | 0.000143067 |
| gene-Led07155-sp3 | -0.546250717 | 0.007153299 |
| gene-Led07186-sp3 | 0.894015201  | 2.40E-05    |
| gene-Led07201-sp3 | -0.803866499 | 0.003072457 |
| gene-Led07210-sp3 | 0.585928902  | 0.003872744 |
| gene-Led07217-sp3 | 1.221670716  | 3.66E-06    |
| gene-Led07218-sp3 | 0.747270759  | 0.000946925 |
| gene-Led07222-sp3 | 0.774801295  | 0.000297252 |
| gene-Led07224-sp3 | 0.598475613  | 0.006725162 |
| gene-Led07227-sp3 | -0.691315154 | 0.001472049 |
| gene-Led07305-sp3 | 0.499598739  | 0.003399243 |
| gene-Led07321-sp3 | 0.562106341  | 0.000203065 |
| gene-Led07327-sp3 | -0.58289099  | 0.003817738 |
| gene-Led07328-sp3 | -0.58289099  | 0.003817738 |
| gene-Led07329-sp3 | -0.58289099  | 0.003817738 |
| gene-Led07332-sp3 | -0.58289099  | 0.003817738 |
| gene-Led07334-sp3 | 0.040894385  | 0.000427612 |
| gene-Led07335-sp3 | -0.58289099  | 0.003817738 |
| gene-Led07362-sp3 | 0.728603149  | 6.56E-06    |
| gene-Led07391-sp3 | -1.615738612 | 2.44E-07    |
| gene-Led07419-sp3 | 0.656923074  | 0.002902299 |
| gene-Led07489-sp3 | 0.578707778  | 0.00042075  |
| gene-Led07503-sp3 | 0.999997177  | 2.25E-06    |
| gene-Led07506-sp3 | -1.029178299 | 4.97E-06    |
| gene-Led07513-sp3 | 1.097292515  | 0.000687292 |
| gene-Led07517-sp3 | 0.623786977  | 0.000390743 |

|                   |              |             |
|-------------------|--------------|-------------|
| gene-Led07518-sp3 | 0.46740763   | 0.0022144   |
| gene-Led07525-sp3 | 0.447920592  | 0.009062248 |
| gene-Led07526-sp3 | -0.95666465  | 0.004155938 |
| gene-Led07537-sp3 | 0.405880779  | 0.006348509 |
| gene-Led07552-sp3 | -0.848338308 | 0.001718968 |
| gene-Led07571-sp3 | 0.448942877  | 0.003521791 |
| gene-Led07581-sp3 | 0.630595146  | 1.92E-05    |
| gene-Led07604-sp3 | 0.862356381  | 1.61E-06    |
| gene-Led07626-sp3 | -0.67382655  | 0.001123639 |
| gene-Led07685-sp3 | 1.284576308  | 1.56E-06    |
| gene-Led07695-sp3 | 0.522826391  | 0.001316986 |
| gene-Led07705-sp3 | 0.418922064  | 0.004200326 |
| gene-Led07712-sp3 | 0.715116539  | 5.88E-05    |
| gene-Led07718-sp3 | 0.435056032  | 0.007747226 |
| gene-Led07720-sp3 | 0.436332811  | 0.003982004 |
| gene-Led07765-sp3 | 0.528168216  | 0.00312546  |
| gene-Led07782-sp3 | -1.037995078 | 0.000435593 |
| gene-Led07793-sp3 | 0.636162569  | 0.000775749 |
| gene-Led07803-sp3 | -0.834602375 | 0.003205262 |
| gene-Led07810-sp3 | 0.569671953  | 0.001493256 |
| gene-Led07827-sp3 | 0.557386732  | 0.00094675  |
| gene-Led07842-sp3 | 0.654001381  | 0.00105046  |
| gene-Led07853-sp3 | 0.577959253  | 0.002725344 |
| gene-Led07862-sp3 | 0.415382558  | 0.004728859 |
| gene-Led07891-sp3 | 0.463239161  | 0.004061885 |
| gene-Led07902-sp3 | 0.446921007  | 0.003679626 |
| gene-Led07918-sp3 | 0.850997055  | 9.55E-06    |
| gene-Led07925-sp3 | 0.55852032   | 0.000870817 |
| gene-Led07958-sp3 | -1.057279717 | 0.000308881 |
| gene-Led07963-sp3 | -0.825533926 | 1.08E-04    |
| gene-Led08017-sp3 | 0.601692055  | 0.00060157  |
| gene-Led08026-sp3 | 1.329828493  | 0.004373417 |
| gene-Led08036-sp3 | 0.76538722   | 0.00028604  |
| gene-Led08044-sp3 | 0.361124653  | 0.008075849 |
| gene-Led08091-sp3 | 0.686028212  | 0.000786386 |
| gene-Led08123-sp3 | 0.496478454  | 0.001175529 |
| gene-Led08127-sp3 | 0.539563395  | 0.000942051 |
| gene-Led08187-sp3 | -1.791238375 | 0.000148017 |
| gene-Led08204-sp3 | 0.574930725  | 0.000479205 |
| gene-Led08218-sp3 | -1.550954596 | 3.17E-08    |
| gene-Led08224-sp3 | 1.890577892  | 0.000186212 |
| gene-Led08257-sp3 | -1.859708878 | 0.00000392  |
| gene-Led08281-sp3 | 0.559618161  | 0.001264592 |
| gene-Led08308-sp3 | 0.417778701  | 0.005073747 |

|                   |              |             |
|-------------------|--------------|-------------|
| gene-Led08389-sp3 | -0.563473285 | 0.003379629 |
| gene-Led08431-sp3 | 0.512448113  | 0.000565528 |
| gene-Led08460-sp3 | -1.621580645 | 1.69E-07    |
| gene-Led08519-sp3 | 0.471331724  | 0.002006338 |
| gene-Led08615-sp3 | 0.547528665  | 0.000481677 |
| gene-Led08636-sp3 | -0.787724802 | 0.000366889 |
| gene-Led08733-sp3 | -1.063604462 | 4.00E-05    |
| gene-Led08734-sp3 | -1.253986816 | 2.42E-05    |
| gene-Led08757-sp3 | -0.5421189   | 0.004455919 |
| gene-Led08786-sp3 | -0.723394649 | 0.001023856 |
| gene-Led08812-sp3 | 0.462252047  | 0.001506384 |
| gene-Led08827-sp3 | 0.926218577  | 1.77E-08    |
| gene-Led08829-sp3 | 0.917321334  | 1.68E-05    |
| gene-Led08838-sp3 | 1.081098759  | 7.86E-09    |
| gene-Led08840-sp3 | -1.089027748 | 0.003032985 |
| gene-Led08896-sp3 | -1.30180567  | 0.00037332  |
| gene-Led08908-sp3 | 1.103046558  | 1.98E-06    |
| gene-Led09023-sp3 | 1.56522619   | 5.18E-11    |
| gene-Led09024-sp3 | -0.430498988 | 0.008916975 |
| gene-Led09039-sp3 | 0.642059613  | 0.006164279 |
| gene-Led09044-sp3 | 0.597316303  | 0.001294014 |
| gene-Led09054-sp3 | -0.917424261 | 1.18E-06    |
| gene-Led09072-sp3 | 0.397117782  | 0.009220241 |
| gene-Led09096-sp3 | 0.664720116  | 0.000155778 |
| gene-Led09160-sp3 | -0.564299296 | 0.009602631 |
| gene-Led09161-sp3 | -1.466238435 | 0.00000717  |
| gene-Led09163-sp3 | 0.544120378  | 0.001362881 |
| gene-Led09169-sp3 | 0.381812825  | 0.00713185  |
| gene-Led09270-sp3 | -0.655348642 | 0.003592346 |
| gene-Led09272-sp3 | 0.444719073  | 0.005026708 |
| gene-Led09273-sp3 | 0.432258321  | 0.003977023 |
| gene-Led09277-sp3 | -0.754551443 | 0.005413194 |
| gene-Led09321-sp3 | -0.635537933 | 0.004774634 |
| gene-Led09355-sp3 | 0.434322657  | 0.007410461 |
| gene-Led09358-sp3 | -1.038712161 | 0.000201859 |
| gene-Led09364-sp3 | -1.25765717  | 0.000269817 |
| gene-Led09371-sp3 | 0.466011148  | 0.003342058 |
| gene-Led09418-sp3 | -0.802427098 | 0.001070931 |
| gene-Led09424-sp3 | -0.811925738 | 0.002419053 |
| gene-Led09430-sp3 | 0.838148758  | 1.50E-05    |
| gene-Led09431-sp3 | 0.927895732  | 8.72E-05    |
| gene-Led09437-sp3 | 0.841722095  | 5.68E-06    |
| gene-Led09438-sp3 | 0.978841923  | 6.18E-08    |
| gene-Led09450-sp3 | 0.79495005   | 4.06E-05    |



|                   |              |             |
|-------------------|--------------|-------------|
| gene-Led09462-sp3 | -1.218546756 | 0.002946143 |
| gene-Led09501-sp3 | 0.409443374  | 0.004437762 |
| gene-Led09516-sp3 | 0.860879118  | 3.60E-05    |
| gene-Led09517-sp3 | 0.547016127  | 0.001509426 |
| gene-Led09577-sp3 | -0.733472244 | 0.005279    |
| gene-Led09604-sp3 | 0.498151485  | 0.004059572 |
| gene-Led09616-sp3 | -1.866673632 | 3.23E-08    |
| gene-Led09617-sp3 | -1.058063341 | 7.48E-06    |
| gene-Led09685-sp3 | 1.086157613  | 0.000429548 |
| gene-Led09702-sp3 | -0.844320491 | 0.000313765 |
| gene-Led09712-sp3 | -0.891537628 | 0.004583175 |
| gene-Led09731-sp3 | 0.395517657  | 0.009637382 |
| gene-Led09734-sp3 | -0.229155025 | 0.005969013 |
| gene-Led09825-sp3 | 0.518349448  | 0.002148045 |
| gene-Led09885-sp3 | -1.295937684 | 2.59E-07    |
| gene-Led09984-sp3 | 0.628127803  | 0.000574396 |
| gene-Led09997-sp3 | 1.311139965  | 0.006962941 |
| gene-Led10016-sp3 | 0.613715353  | 0.000277922 |
| gene-Led10040-sp3 | 0.439596104  | 0.003398933 |
| gene-Led10041-sp3 | 0.607786412  | 0.001240845 |
| gene-Led10046-sp3 | -1.029005032 | 1.76E-05    |
| gene-Led10083-sp3 | 0.872338414  | 0.000187026 |
| gene-Led10088-sp3 | 0.613252571  | 0.000496484 |
| gene-Led10102-sp3 | 0.673260651  | 0.000130544 |
| gene-Led10145-sp3 | -0.49598177  | 0.000983408 |
| gene-Led10228-sp3 | -0.938383023 | 0.000175938 |
| gene-Led10235-sp3 | -1.202352003 | 0.001378633 |
| gene-Led10238-sp3 | -1.431439897 | 0.000941878 |
| gene-Led10239-sp3 | 1.238727046  | 5.15E-09    |
| gene-Led10299-sp3 | -0.79549449  | 0.005362152 |
| gene-Led10334-sp3 | -0.803584532 | 0.004155225 |
| gene-Led10376-sp3 | -0.635975853 | 0.003728101 |
| gene-Led10456-sp3 | 0.405000406  | 0.009348758 |
| gene-Led10484-sp3 | -0.841389814 | 4.78E-05    |
| gene-Led10492-sp3 | -0.775576754 | 0.000179867 |
| gene-Led10531-sp3 | -1.924617049 | 1.44E-17    |
| gene-Led10555-sp3 | -1.402820337 | 6.55E-08    |
| gene-Led10562-sp3 | 0.577141125  | 0.000421401 |
| gene-Led10584-sp3 | 0.710455082  | 2.69E-05    |
| gene-Led10587-sp3 | 0.632948637  | 0.000156029 |
| gene-Led10643-sp3 | 0.584088689  | 0.001911626 |
| gene-Led10674-sp3 | 0.496779091  | 0.001181524 |
| gene-Led10686-sp3 | 0.511504433  | 0.003285955 |
| gene-Led10746-sp3 | 0.610597495  | 0.001675596 |

|                   |              |             |
|-------------------|--------------|-------------|
| gene-Led10757-sp3 | 0.946972275  | 0.000724195 |
| gene-Led10763-sp3 | -0.539499205 | 0.004904371 |
| gene-Led10768-sp3 | -0.537462053 | 0.004285673 |
| gene-Led10813-sp3 | 0.858744023  | 8.29E-06    |
| gene-Led10877-sp3 | 0.454047064  | 0.009199623 |
| gene-Led10888-sp3 | 0.544457477  | 0.002323114 |
| gene-Led10891-sp3 | 0.624397589  | 0.000294024 |
| gene-Led10892-sp3 | 1.706180349  | 0.0000216   |
| gene-Led10927-sp3 | 0.923933228  | 0.0053261   |
| gene-Led10930-sp3 | 0.614388099  | 0.000247512 |
| gene-Led10991-sp3 | 1.708639016  | 9.03E-12    |
| gene-Led10993-sp3 | 0.840937052  | 0.000154492 |
| gene-Led10998-sp3 | 0.76672857   | 0.002100344 |
| gene-Led11008-sp3 | -0.58289099  | 0.003817738 |
| gene-Led11010-sp3 | -0.58289099  | 0.003817738 |
| gene-Led11012-sp3 | -0.58289099  | 0.003817738 |
| gene-Led11122-sp3 | -1.303125923 | 5.27E-06    |
| gene-Led11182-sp3 | -0.541740775 | 0.003264716 |
| gene-Led11264-sp3 | 0.87459717   | 0.00202385  |
| gene-Led11436-sp3 | 0.498151485  | 0.004059572 |

---

**Table S4 DEG lists of LeHH24h vs LeHH0h**

| <b>gene</b>       | <b>log2FoldChange</b> | <b>pvalue</b> |
|-------------------|-----------------------|---------------|
| gene-Led00002-sp3 | 0.884658861           | 0.003860364   |
| gene-Led00032-sp3 | -0.980425368          | 0.0086175     |
| gene-Led00038-sp3 | -1.51862801           | 0.001126656   |
| gene-Led00039-sp3 | -0.961523732          | 0.002084475   |
| gene-Led00043-sp3 | -0.81163756           | 0.008795189   |
| gene-Led00080-sp3 | -1.045766383          | 0.00000303    |
| gene-Led00095-sp3 | 1.430407342           | 0.0000724     |
| gene-Led00100-sp3 | 0.978827461           | 0.00000848    |
| gene-Led00101-sp3 | -0.946623752          | 0.003151243   |
| gene-Led00117-sp3 | 1.114179743           | 0.00000132    |
| gene-Led00122-sp3 | 1.107675847           | 0.000877962   |
| gene-Led00127-sp3 | -4.550205967          | 2.05E-47      |
| gene-Led00130-sp3 | -1.656766831          | 0.000284865   |
| gene-Led00171-sp3 | -0.907061119          | 0.000568868   |
| gene-Led00180-sp3 | -1.674884685          | 9.04E-11      |
| gene-Led00196-sp3 | -1.14558838           | 0.000174151   |
| gene-Led00247-sp3 | -0.4289909            | 0.006675272   |
| gene-Led00250-sp3 | 0.706386425           | 0.001187254   |
| gene-Led00256-sp3 | 1.139814126           | 0.00024372    |
| gene-Led00278-sp3 | -1.167201306          | 0.001318276   |
| gene-Led00280-sp3 | 0.552140811           | 0.000579441   |
| gene-Led00287-sp3 | -0.526203731          | 0.008276073   |
| gene-Led00318-sp3 | 0.774131792           | 0.00000421    |
| gene-Led00326-sp3 | -2.462030874          | 4.02E-12      |
| gene-Led00329-sp3 | -0.818051129          | 0.009360569   |
| gene-Led00336-sp3 | -1.326524658          | 0.000000169   |
| gene-Led00345-sp3 | 1.262559219           | 0.005572555   |
| gene-Led00346-sp3 | 0.573012433           | 0.000124254   |
| gene-Led00395-sp3 | -1.41096077           | 0.0000132     |
| gene-Led00411-sp3 | -0.717670478          | 0.008442208   |
| gene-Led00433-sp3 | -1.91726536           | 0.0000173     |
| gene-Led00433-sp3 | -1.361759388          | 0.002748618   |
| gene-Led00452-sp3 | -0.625716414          | 0.000991527   |
| gene-Led00457-sp3 | 0.660847197           | 0.006844967   |
| gene-Led00473-sp3 | 1.640120934           | 0.000122309   |
| gene-Led00498-sp3 | 0.845743997           | 0.00502626    |
| gene-Led00503-sp3 | -1.093249963          | 5.26E-10      |
| gene-Led00518-sp3 | 0.728901541           | 0.003074949   |
| gene-Led00522-sp3 | 0.540866442           | 0.005020539   |
| gene-Led00534-sp3 | -2.547521365          | 2.18E-14      |
| gene-Led00538-sp3 | -1.566347621          | 0.002815963   |
| gene-Led00547-sp3 | 0.767526728           | 0.001179862   |

|                   |              |             |
|-------------------|--------------|-------------|
| gene-Led00552-sp3 | -1.738281337 | 1.05E-10    |
| gene-Led00553-sp3 | -2.980125573 | 8.08E-27    |
| gene-Led00559-sp3 | -0.997626772 | 0.000907685 |
| gene-Led00561-sp3 | -0.594831293 | 0.005997328 |
| gene-Led00566-sp3 | 0.747937368  | 0.001019526 |
| gene-Led00576-sp3 | 0.735059443  | 0.002361563 |
| gene-Led00581-sp3 | 0.475370215  | 0.001576342 |
| gene-Led00589-sp3 | 0.395909585  | 0.008611365 |
| gene-Led00590-sp3 | 0.88964205   | 0.002225685 |
| gene-Led00619-sp3 | 1.226999274  | 0.00000186  |
| gene-Led00655-sp3 | 1.144118952  | 0.000000465 |
| gene-Led00661-sp3 | 0.457705332  | 0.000912759 |
| gene-Led00680-sp3 | -0.485073025 | 0.003261329 |
| gene-Led00683-sp3 | -3.708411653 | 4.56E-14    |
| gene-Led00693-sp3 | 0.684180846  | 0.000851814 |
| gene-Led00702-sp3 | 0.525242274  | 0.008034139 |
| gene-Led00709-sp3 | 2.94670599   | 1.07E-08    |
| gene-Led00727-sp3 | 0.757459856  | 0.005222107 |
| gene-Led00734-sp3 | 2.81779726   | 0.0000703   |
| gene-Led00741-sp3 | 2.672526421  | 0.0000129   |
| gene-Led00742-sp3 | 0.985988849  | 0.0000195   |
| gene-Led00748-sp3 | 0.536392849  | 0.005222844 |
| gene-Led00751-sp3 | 0.560110978  | 0.002220912 |
| gene-Led00753-sp3 | 0.516684212  | 0.003239784 |
| gene-Led00754-sp3 | 1.056522578  | 0.00000024  |
| gene-Led00777-sp3 | 0.971843266  | 2.83E-08    |
| gene-Led00809-sp3 | 0.717416798  | 0.004596496 |
| gene-Led00823-sp3 | -4.434161235 | 0.000844891 |
| gene-Led00833-sp3 | 0.793752339  | 0.004256536 |
| gene-Led00864-sp3 | 0.505872752  | 0.007108619 |
| gene-Led00883-sp3 | 1.140859116  | 0.0000742   |
| gene-Led00902-sp3 | -2.603914101 | 4.41E-28    |
| gene-Led00903-sp3 | -1.846444719 | 4.44E-17    |
| gene-Led00904-sp3 | -2.428295293 | 0.00000198  |
| gene-Led00905-sp3 | -3.494505695 | 7.05E-53    |
| gene-Led00906-sp3 | -2.190565021 | 9.6E-25     |
| gene-Led00907-sp3 | -3.61440125  | 9.34E-23    |
| gene-Led00907-sp3 | -2.993189488 | 1.89E-18    |
| gene-Led00908-sp3 | -1.178261644 | 4.76E-08    |
| gene-Led00909-sp3 | -1.859266113 | 9.39E-12    |
| gene-Led00910-sp3 | -1.701601388 | 1.02E-22    |
| gene-Led00911-sp3 | -2.756963103 | 0.000115025 |
| gene-Led00911-sp3 | -1.662322227 | 0.000372909 |
| gene-Led00912-sp3 | -3.289269524 | 0.000000479 |

|                   |              |             |
|-------------------|--------------|-------------|
| gene-Led00918-sp3 | 1.592371982  | 0.000037    |
| gene-Led00921-sp3 | 0.511535916  | 0.001391457 |
| gene-Led00925-sp3 | -0.629519178 | 0.006207571 |
| gene-Led00926-sp3 | 1.909385877  | 0.00000067  |
| gene-Led00929-sp3 | -3.235093277 | 9.56E-21    |
| gene-Led00933-sp3 | -0.637448272 | 0.002240132 |
| gene-Led00934-sp3 | 0.696668766  | 0.003162645 |
| gene-Led00940-sp3 | 0.606536495  | 0.001172648 |
| gene-Led00943-sp3 | -1.342577782 | 1.34E-10    |
| gene-Led00975-sp3 | -1.394433889 | 0.0000726   |
| gene-Led00983-sp3 | 2.466245183  | 0.0000029   |
| gene-Led01009-sp3 | 1.015954252  | 0.000120327 |
| gene-Led01017-sp3 | 0.564324574  | 0.001972261 |
| gene-Led01028-sp3 | -0.916769985 | 0.0000227   |
| gene-Led01058-sp3 | 1.783605016  | 0.000901574 |
| gene-Led01075-sp3 | 0.779410962  | 0.0000519   |
| gene-Led01085-sp3 | 0.477707295  | 0.006901348 |
| gene-Led01098-sp3 | -1.77718044  | 1.81E-12    |
| gene-Led01116-sp3 | 1.071641069  | 0.00000102  |
| gene-Led01121-sp3 | -0.689899901 | 0.006852849 |
| gene-Led01142-sp3 | 0.817382011  | 0.000109768 |
| gene-Led01148-sp3 | -1.592182711 | 0.000237628 |
| gene-Led01166-sp3 | 2.654258792  | 1.45E-13    |
| gene-Led01180-sp3 | -2.714251574 | 9.24E-13    |
| gene-Led01196-sp3 | 0.948607299  | 0.004967029 |
| gene-Led01198-sp3 | -1.251840961 | 0.000439134 |
| gene-Led01201-sp3 | -2.973942251 | 8.32E-16    |
| gene-Led01215-sp3 | 0.471232954  | 0.008328937 |
| gene-Led01221-sp3 | -0.465189226 | 0.003983595 |
| gene-Led01231-sp3 | -0.888477793 | 0.0000765   |
| gene-Led01245-sp3 | -1.305177269 | 5.29E-10    |
| gene-Led01246-sp3 | 0.694993279  | 0.002624244 |
| gene-Led01247-sp3 | 0.704540514  | 0.001336773 |
| gene-Led01249-sp3 | -0.6704988   | 0.000442592 |
| gene-Led01254-sp3 | 0.590222151  | 0.001399318 |
| gene-Led01265-sp3 | 2.398446095  | 0.000857532 |
| gene-Led01276-sp3 | 1.898420098  | 2.28E-09    |
| gene-Led01279-sp3 | 0.567262241  | 0.005653005 |
| gene-Led01295-sp3 | 0.592385324  | 0.007960964 |
| gene-Led01300-sp3 | -1.625707613 | 0.001850407 |
| gene-Led01302-sp3 | 2.629550872  | 0.000000442 |
| gene-Led01305-sp3 | 0.82598816   | 0.0000847   |
| gene-Led01312-sp3 | 2.067826198  | 2.84E-10    |
| gene-Led01325-sp3 | -5.157532903 | 2.81E-56    |

|                   |              |             |
|-------------------|--------------|-------------|
| gene-Led01338-sp3 | -0.545481648 | 0.003348085 |
| gene-Led01343-sp3 | 0.653873896  | 0.002474115 |
| gene-Led01345-sp3 | 1.243216171  | 0.000563745 |
| gene-Led01346-sp3 | -0.804394331 | 0.00000494  |
| gene-Led01347-sp3 | 1.067990052  | 0.0000464   |
| gene-Led01348-sp3 | -2.082411901 | 0.00036553  |
| gene-Led01359-sp3 | 1.53575967   | 0.000000642 |
| gene-Led01372-sp3 | 0.515043451  | 0.005478752 |
| gene-Led01379-sp3 | 0.725173553  | 0.005240704 |
| gene-Led01400-sp3 | 0.696543535  | 0.000153616 |
| gene-Led01407-sp3 | -1.874939818 | 0.000000147 |
| gene-Led01431-sp3 | 0.737166723  | 0.002826398 |
| gene-Led01443-sp3 | -1.360022995 | 0.000101215 |
| gene-Led01458-sp3 | 2.081239168  | 5.91E-13    |
| gene-Led01466-sp3 | -0.642670606 | 0.006192378 |
| gene-Led01472-sp3 | 1.659325713  | 2.47E-11    |
| gene-Led01475-sp3 | -1.502829529 | 0.000291067 |
| gene-Led01483-sp3 | -1.990325558 | 0.000522009 |
| gene-Led01492-sp3 | -1.065086174 | 0.001077992 |
| gene-Led01498-sp3 | 1.237582139  | 0.000000507 |
| gene-Led01530-sp3 | 0.462595721  | 0.004277678 |
| gene-Led01536-sp3 | -0.628324626 | 0.000201507 |
| gene-Led01537-sp3 | 2.201348565  | 0.00000914  |
| gene-Led01538-sp3 | 3.284571587  | 3.34E-33    |
| gene-Led01539-sp3 | 1.924743146  | 1.03E-11    |
| gene-Led01548-sp3 | 2.131050194  | 0.000982984 |
| gene-Led01550-sp3 | 1.597688791  | 0.000000054 |
| gene-Led01556-sp3 | -1.55758671  | 0.000585008 |
| gene-Led01557-sp3 | 2.438666048  | 0.0000259   |
| gene-Led01557-sp3 | 4.129170864  | 0.0000703   |
| gene-Led01567-sp3 | 3.049616694  | 7.47E-23    |
| gene-Led01568-sp3 | 1.68048791   | 5.32E-10    |
| gene-Led01578-sp3 | -1.644824183 | 0.000000077 |
| gene-Led01603-sp3 | -0.763307334 | 0.005166362 |
| gene-Led01608-sp3 | -0.45326999  | 0.004361348 |
| gene-Led01609-sp3 | -1.759783534 | 5.85E-13    |
| gene-Led01612-sp3 | -3.725642977 | 2.04E-30    |
| gene-Led01618-sp3 | 0.649969241  | 0.000137153 |
| gene-Led01630-sp3 | 1.602550971  | 0.001719029 |
| gene-Led01632-sp3 | 0.604446108  | 0.001878223 |
| gene-Led01634-sp3 | -0.991925435 | 0.0000688   |
| gene-Led01670-sp3 | 0.732407196  | 0.0000918   |
| gene-Led01673-sp3 | -1.521867648 | 4.12E-10    |
| gene-Led01674-sp3 | 0.518059721  | 0.004872619 |

|                   |              |             |
|-------------------|--------------|-------------|
| gene-Led01680-sp3 | -1.056379126 | 0.001354748 |
| gene-Led01684-sp3 | -0.985088328 | 0.003729355 |
| gene-Led01687-sp3 | -2.388186548 | 5.08E-09    |
| gene-Led01693-sp3 | 1.113020952  | 0.00657145  |
| gene-Led01698-sp3 | -2.088491516 | 7.98E-11    |
| gene-Led01699-sp3 | 0.380604564  | 0.007700354 |
| gene-Led01700-sp3 | 0.585038923  | 0.000358106 |
| gene-Led01706-sp3 | 0.849580383  | 0.00000822  |
| gene-Led01707-sp3 | 0.847985854  | 0.000000412 |
| gene-Led01718-sp3 | -2.492676969 | 5.57E-16    |
| gene-Led01727-sp3 | 0.820058247  | 0.003727486 |
| gene-Led01736-sp3 | 0.483520393  | 0.002974127 |
| gene-Led01763-sp3 | 1.418210154  | 0.000037    |
| gene-Led01764-sp3 | 2.34563601   | 1.15E-12    |
| gene-Led01765-sp3 | 4.392257766  | 4.38E-38    |
| gene-Led01767-sp3 | 0.683804509  | 0.000732998 |
| gene-Led01769-sp3 | -0.56802338  | 0.001250905 |
| gene-Led01797-sp3 | 0.637693274  | 0.001826363 |
| gene-Led01806-sp3 | 0.964590734  | 0.0000682   |
| gene-Led01821-sp3 | 1.160187313  | 0.000762347 |
| gene-Led01821-sp3 | 1.429486584  | 0.001677067 |
| gene-Led01831-sp3 | -2.70277376  | 7.41E-15    |
| gene-Led01832-sp3 | 0.89670551   | 0.001360998 |
| gene-Led01835-sp3 | -1.251624739 | 0.000600308 |
| gene-Led01837-sp3 | 1.458909254  | 0.006724166 |
| gene-Led01838-sp3 | 1.866858594  | 0.000285999 |
| gene-Led01843-sp3 | 1.104837177  | 0.002566197 |
| gene-Led01859-sp3 | 2.526593313  | 1.25E-10    |
| gene-Led01902-sp3 | -0.496821214 | 0.006735554 |
| gene-Led01916-sp3 | -0.625912232 | 0.000216302 |
| gene-Led01936-sp3 | -1.130065282 | 0.007675403 |
| gene-Led01938-sp3 | -1.888768928 | 9.55E-08    |
| gene-Led01939-sp3 | -1.087329729 | 0.000685976 |
| gene-Led01940-sp3 | 0.598337594  | 0.003732111 |
| gene-Led01946-sp3 | -0.664366075 | 0.009701425 |
| gene-Led01950-sp3 | 1.117086009  | 0.001208523 |
| gene-Led01951-sp3 | -4.374233239 | 0.000000795 |
| gene-Led01961-sp3 | -1.064591632 | 0.0000242   |
| gene-Led01968-sp3 | -1.313806457 | 0.000000417 |
| gene-Led01973-sp3 | 0.909048425  | 0.002290296 |
| gene-Led01978-sp3 | -5.438044822 | 5.37E-15    |
| gene-Led02016-sp3 | 2.122771706  | 2.9E-14     |
| gene-Led02021-sp3 | 1.139496316  | 0.001103004 |
| gene-Led02054-sp3 | 0.864389311  | 0.001815486 |



|                   |              |             |
|-------------------|--------------|-------------|
| gene-Led02063-sp3 | 1.682324464  | 1.12E-12    |
| gene-Led02064-sp3 | 0.796665549  | 0.00021758  |
| gene-Led02111-sp3 | 1.209886862  | 0.00000448  |
| gene-Led02154-sp3 | -2.081752985 | 0.0000944   |
| gene-Led02157-sp3 | 1.206679325  | 4.56E-09    |
| gene-Led02168-sp3 | 0.478671908  | 0.007578517 |
| gene-Led02181-sp3 | 0.653143629  | 0.006662686 |
| gene-Led02188-sp3 | -2.335605068 | 0.0000233   |
| gene-Led02212-sp3 | -0.878678013 | 0.001339995 |
| gene-Led02241-sp3 | 1.313383764  | 0.00031884  |
| gene-Led02251-sp3 | 1.462700913  | 0.000162679 |
| gene-Led02252-sp3 | 1.034770578  | 0.003371084 |
| gene-Led02273-sp3 | 1.883005411  | 1.1E-19     |
| gene-Led02291-sp3 | 1.57319343   | 0.000485072 |
| gene-Led02293-sp3 | 0.58275462   | 0.001738499 |
| gene-Led02300-sp3 | 0.809688481  | 0.000850924 |
| gene-Led02325-sp3 | 0.79896677   | 0.0000918   |
| gene-Led02347-sp3 | 1.048311516  | 0.000644341 |
| gene-Led02351-sp3 | 0.618868168  | 0.000525902 |
| gene-Led02374-sp3 | 0.73322228   | 0.000372049 |
| gene-Led02376-sp3 | -1.295069292 | 0.000102514 |
| gene-Led02377-sp3 | -1.662820622 | 0.00000214  |
| gene-Led02381-sp3 | 0.782213401  | 0.002301298 |
| gene-Led02383-sp3 | 0.496633828  | 0.000499922 |
| gene-Led02384-sp3 | 3.061432775  | 0.000519205 |
| gene-Led02397-sp3 | -0.885080883 | 0.002054972 |
| gene-Led02397-sp3 | 1.02076567   | 0.006156477 |
| gene-Led02417-sp3 | 0.749327316  | 0.0000137   |
| gene-Led02419-sp3 | 0.501744701  | 0.006804232 |
| gene-Led02438-sp3 | -5.136953843 | 1.29E-16    |
| gene-Led02440-sp3 | -2.127708772 | 7.43E-08    |
| gene-Led02452-sp3 | 0.558447919  | 0.001609939 |
| gene-Led02458-sp3 | -1.02392194  | 0.001032634 |
| gene-Led02478-sp3 | 0.857145176  | 0.001299274 |
| gene-Led02486-sp3 | 0.544929379  | 0.002328009 |
| gene-Led02494-sp3 | 3.342413469  | 1.28E-08    |
| gene-Led02500-sp3 | 3.087038209  | 0.0000573   |
| gene-Led02501-sp3 | 0.835507573  | 0.00000575  |
| gene-Led02516-sp3 | -1.311879384 | 0.000792413 |
| gene-Led02521-sp3 | 1.131696274  | 0.000000699 |
| gene-Led02526-sp3 | 0.6435428    | 0.003955121 |
| gene-Led02550-sp3 | -1.460883366 | 0.00000982  |
| gene-Led02558-sp3 | -1.104646042 | 0.000315533 |
| gene-Led02605-sp3 | 0.598158043  | 0.003131298 |

|                   |              |             |
|-------------------|--------------|-------------|
| gene-Led02611-sp3 | 0.564362698  | 0.004300748 |
| gene-Led02625-sp3 | -2.512737119 | 2.29E-13    |
| gene-Led02640-sp3 | 2.250277666  | 0.0000893   |
| gene-Led02640-sp3 | -0.857194879 | 0.008550893 |
| gene-Led02666-sp3 | 0.40646783   | 0.008672399 |
| gene-Led02673-sp3 | 0.500938771  | 0.002096267 |
| gene-Led02690-sp3 | 1.095978129  | 0.001445712 |
| gene-Led02699-sp3 | 4.018346578  | 0.000014    |
| gene-Led02707-sp3 | 0.612264955  | 0.000461997 |
| gene-Led02726-sp3 | 0.674598022  | 0.003874191 |
| gene-Led02736-sp3 | 2.439960696  | 3.41E-20    |
| gene-Led02745-sp3 | 0.89475851   | 0.003914312 |
| gene-Led02747-sp3 | 1.050046588  | 0.000529099 |
| gene-Led02755-sp3 | -0.507143499 | 0.007155825 |
| gene-Led02757-sp3 | 1.646560122  | 1.26E-11    |
| gene-Led02766-sp3 | -0.911384352 | 0.006507655 |
| gene-Led02769-sp3 | 0.52245835   | 0.00402662  |
| gene-Led02776-sp3 | 1.617424105  | 3.14E-14    |
| gene-Led02804-sp3 | -0.407694068 | 0.002831496 |
| gene-Led02823-sp3 | 0.474832598  | 0.006483259 |
| gene-Led02850-sp3 | -1.058621342 | 0.000407626 |
| gene-Led02851-sp3 | 0.835153729  | 0.0000128   |
| gene-Led02859-sp3 | -1.028487782 | 1.47E-08    |
| gene-Led02883-sp3 | -2.575234165 | 0.000000025 |
| gene-Led02884-sp3 | 0.43037552   | 0.005372341 |
| gene-Led02893-sp3 | 0.77032127   | 0.00504444  |
| gene-Led02898-sp3 | -1.17653032  | 0.004310522 |
| gene-Led02900-sp3 | 0.945133516  | 0.00000135  |
| gene-Led02910-sp3 | -2.336809405 | 1.69E-17    |
| gene-Led02922-sp3 | 0.930858184  | 0.000620874 |
| gene-Led02941-sp3 | 1.067682263  | 0.000000022 |
| gene-Led02958-sp3 | 1.061393039  | 8.15E-10    |
| gene-Led02986-sp3 | -0.961555998 | 0.004180527 |
| gene-Led02992-sp3 | 0.95491769   | 0.006492992 |
| gene-Led03000-sp3 | 2.63547854   | 0.0000614   |
| gene-Led03028-sp3 | 0.53969679   | 0.003651501 |
| gene-Led03032-sp3 | 0.647022435  | 0.007697726 |
| gene-Led03038-sp3 | 0.699873051  | 0.000147451 |
| gene-Led03045-sp3 | 2.23430974   | 0.0000152   |
| gene-Led03047-sp3 | 0.461369525  | 0.003874711 |
| gene-Led03053-sp3 | 0.658442091  | 0.000612767 |
| gene-Led03055-sp3 | 0.893403352  | 0.00237094  |
| gene-Led03066-sp3 | 0.632403255  | 0.000132356 |
| gene-Led03076-sp3 | 0.769116584  | 0.000999384 |

|                   |              |             |
|-------------------|--------------|-------------|
| gene-Led03084-sp3 | -0.855322839 | 0.000539926 |
| gene-Led03097-sp3 | 0.923217863  | 0.000000699 |
| gene-Led03128-sp3 | 0.548189356  | 0.002817855 |
| gene-Led03152-sp3 | 0.453925271  | 0.001928724 |
| gene-Led03154-sp3 | -0.992943115 | 0.0000253   |
| gene-Led03155-sp3 | -1.356380414 | 0.00000344  |
| gene-Led03165-sp3 | 0.742337687  | 0.002099215 |
| gene-Led03168-sp3 | 0.993697003  | 0.00000411  |
| gene-Led03172-sp3 | -2.734467842 | 0.00000124  |
| gene-Led03200-sp3 | 1.31054333   | 0.0000256   |
| gene-Led03201-sp3 | 2.329520425  | 2.52E-08    |
| gene-Led03203-sp3 | -1.470981107 | 1.32E-09    |
| gene-Led03208-sp3 | 0.877777888  | 0.00000578  |
| gene-Led03210-sp3 | 0.830441062  | 0.009592624 |
| gene-Led03217-sp3 | -1.545046613 | 0.003379033 |
| gene-Led03224-sp3 | 0.824279978  | 0.001714848 |
| gene-Led03227-sp3 | 0.580240478  | 0.005839117 |
| gene-Led03229-sp3 | 1.423099866  | 0.000323313 |
| gene-Led03234-sp3 | 0.541307712  | 0.004288991 |
| gene-Led03248-sp3 | -1.463701504 | 0.0000999   |
| gene-Led03250-sp3 | 0.939648652  | 0.00023312  |
| gene-Led03258-sp3 | 0.797787739  | 0.006289596 |
| gene-Led03270-sp3 | 1.438548605  | 0.000126523 |
| gene-Led03287-sp3 | 2.805171565  | 6.18E-20    |
| gene-Led03303-sp3 | 0.858844357  | 0.001695982 |
| gene-Led03323-sp3 | 0.907503935  | 0.00000546  |
| gene-Led03328-sp3 | -2.126005296 | 2.8E-09     |
| gene-Led03332-sp3 | -0.752801929 | 0.003347376 |
| gene-Led03343-sp3 | -0.926595747 | 0.006994418 |
| gene-Led03375-sp3 | 0.701125642  | 0.000116897 |
| gene-Led03404-sp3 | -1.016939675 | 0.009356242 |
| gene-Led03418-sp3 | -0.946825036 | 0.000428379 |
| gene-Led03423-sp3 | 0.86999493   | 0.001811935 |
| gene-Led03426-sp3 | 1.293377324  | 6.98E-09    |
| gene-Led03433-sp3 | 0.507390853  | 0.004419293 |
| gene-Led03434-sp3 | 1.818031736  | 0.000000157 |
| gene-Led03440-sp3 | 1.199483491  | 0.0000192   |
| gene-Led03441-sp3 | 1.227497206  | 0.0000121   |
| gene-Led03464-sp3 | 0.954200363  | 0.0000925   |
| gene-Led03466-sp3 | -1.32975829  | 0.0000223   |
| gene-Led03474-sp3 | 0.685359113  | 0.002954705 |
| gene-Led03486-sp3 | 0.742497073  | 0.001911697 |
| gene-Led03487-sp3 | 1.826429963  | 0.000128994 |
| gene-Led03490-sp3 | -0.59134758  | 0.005626059 |

|                   |              |             |
|-------------------|--------------|-------------|
| gene-Led03515-sp3 | 0.533665053  | 0.001289918 |
| gene-Led03534-sp3 | -1.012955855 | 0.005443472 |
| gene-Led03538-sp3 | -1.043009035 | 0.000120072 |
| gene-Led03547-sp3 | 1.20202213   | 0.002408302 |
| gene-Led03557-sp3 | -2.079595362 | 2.39E-11    |
| gene-Led03570-sp3 | -1.799976378 | 0.000000266 |
| gene-Led03576-sp3 | 1.59900016   | 4.45E-11    |
| gene-Led03596-sp3 | -0.639540057 | 0.002008722 |
| gene-Led03597-sp3 | 0.849758061  | 0.000194297 |
| gene-Led03599-sp3 | 0.654572844  | 0.005972806 |
| gene-Led03620-sp3 | 0.585558498  | 0.001717144 |
| gene-Led03623-sp3 | 1.127562511  | 0.000119382 |
| gene-Led03628-sp3 | 1.266164414  | 0.00000211  |
| gene-Led03656-sp3 | 0.671022652  | 0.006557028 |
| gene-Led03670-sp3 | -1.016678288 | 0.00613838  |
| gene-Led03682-sp3 | -0.684192772 | 0.007336368 |
| gene-Led03684-sp3 | 0.892479337  | 0.0080061   |
| gene-Led03684-sp3 | 2.239919485  | 0.007762783 |
| gene-Led03699-sp3 | -1.899123125 | 0.001362675 |
| gene-Led03702-sp3 | 1.291913893  | 0.000000298 |
| gene-Led03708-sp3 | 1.02645596   | 0.007284315 |
| gene-Led03712-sp3 | 0.952675954  | 0.00000606  |
| gene-Led03736-sp3 | 1.680005705  | 0.000000124 |
| gene-Led03745-sp3 | -0.965465925 | 0.000100805 |
| gene-Led03748-sp3 | 1.734551018  | 0.000271422 |
| gene-Led03760-sp3 | -2.193064264 | 0.000372525 |
| gene-Led03765-sp3 | -0.8598829   | 0.00000788  |
| gene-Led03789-sp3 | -2.451654798 | 0.000000297 |
| gene-Led03811-sp3 | 0.695285277  | 0.000267845 |
| gene-Led03820-sp3 | 1.129019601  | 0.0000435   |
| gene-Led03839-sp3 | 1.458088343  | 0.0000928   |
| gene-Led03840-sp3 | 0.881236676  | 0.00476174  |
| gene-Led03841-sp3 | -0.984918819 | 0.0000275   |
| gene-Led03842-sp3 | -2.972462341 | 4.3E-13     |
| gene-Led03850-sp3 | -0.707584617 | 0.000228298 |
| gene-Led03859-sp3 | 0.70340981   | 0.000787307 |
| gene-Led03871-sp3 | 0.673491197  | 0.000202368 |
| gene-Led03878-sp3 | 0.427232563  | 0.006971124 |
| gene-Led03886-sp3 | 1.461102463  | 1.69E-12    |
| gene-Led03887-sp3 | 1.118354464  | 1.88E-08    |
| gene-Led03888-sp3 | 1.452898227  | 7.13E-14    |
| gene-Led03889-sp3 | 0.478960119  | 0.00181928  |
| gene-Led03890-sp3 | 0.468245993  | 0.001255794 |
| gene-Led03896-sp3 | 1.722691664  | 7.31E-12    |

|                   |              |             |
|-------------------|--------------|-------------|
| gene-Led03897-sp3 | -1.58376794  | 7.11E-11    |
| gene-Led03898-sp3 | -1.00077261  | 3.39E-10    |
| gene-Led03899-sp3 | 0.655747252  | 0.004833205 |
| gene-Led03907-sp3 | 1.289909543  | 0.000151112 |
| gene-Led03908-sp3 | 2.215181614  | 0.002062558 |
| gene-Led03916-sp3 | 1.186762684  | 0.009093284 |
| gene-Led03922-sp3 | 1.229527696  | 0.000492429 |
| gene-Led03929-sp3 | -1.512779978 | 0.005331892 |
| gene-Led03932-sp3 | -2.566750245 | 3.9E-13     |
| gene-Led03934-sp3 | 0.490256805  | 0.005926559 |
| gene-Led03965-sp3 | 2.357949588  | 0.000280775 |
| gene-Led03968-sp3 | -0.927469045 | 0.004358891 |
| gene-Led03985-sp3 | -0.520200512 | 0.001474266 |
| gene-Led03989-sp3 | 0.975511981  | 0.000449382 |
| gene-Led04039-sp3 | 0.587855139  | 0.000207048 |
| gene-Led04040-sp3 | 0.642815608  | 0.000410883 |
| gene-Led04046-sp3 | -0.600040438 | 0.005183418 |
| gene-Led04057-sp3 | 0.608382296  | 0.004871305 |
| gene-Led04058-sp3 | 0.824922822  | 0.000871113 |
| gene-Led04062-sp3 | -0.830962538 | 0.000874807 |
| gene-Led04117-sp3 | 1.358158209  | 0.002293969 |
| gene-Led04121-sp3 | -1.890743279 | 4.99E-14    |
| gene-Led04123-sp3 | -1.113752272 | 0.000234982 |
| gene-Led04128-sp3 | 1.172076668  | 0.00000133  |
| gene-Led04131-sp3 | -2.369017177 | 3.39E-08    |
| gene-Led04139-sp3 | -0.770466962 | 0.003214681 |
| gene-Led04147-sp3 | 0.759131238  | 0.005647993 |
| gene-Led04157-sp3 | 1.287226321  | 0.0000673   |
| gene-Led04164-sp3 | 0.827354096  | 0.002679177 |
| gene-Led04170-sp3 | -1.084463284 | 0.004890638 |
| gene-Led04171-sp3 | -0.839539289 | 0.001827921 |
| gene-Led04173-sp3 | 0.673486955  | 0.003412538 |
| gene-Led04193-sp3 | 0.758002315  | 0.001879363 |
| gene-Led04203-sp3 | 1.442121234  | 2.29E-10    |
| gene-Led04215-sp3 | -0.757112735 | 0.006702296 |
| gene-Led04227-sp3 | 0.892867229  | 0.000165811 |
| gene-Led04228-sp3 | 0.929173627  | 0.00233066  |
| gene-Led04260-sp3 | -0.996040834 | 0.00257951  |
| gene-Led04261-sp3 | -1.394582037 | 0.00000687  |
| gene-Led04270-sp3 | 1.976556609  | 0.000402325 |
| gene-Led04270-sp3 | 1.077564726  | 0.003819793 |
| gene-Led04279-sp3 | -3.99216576  | 1.34E-39    |
| gene-Led04282-sp3 | 2.144270547  | 1.32E-09    |
| gene-Led04285-sp3 | -0.674803413 | 0.001551767 |

|                   |              |             |
|-------------------|--------------|-------------|
| gene-Led04286-sp3 | 0.523240824  | 0.002180186 |
| gene-Led04295-sp3 | 0.601869484  | 0.006758934 |
| gene-Led04310-sp3 | -2.393788595 | 0.0000041   |
| gene-Led04322-sp3 | 0.744387527  | 0.000000206 |
| gene-Led04323-sp3 | 0.614240723  | 0.000000715 |
| gene-Led04329-sp3 | 0.869064998  | 0.006630708 |
| gene-Led04336-sp3 | -3.195800667 | 5.23E-10    |
| gene-Led04345-sp3 | -4.596093261 | 2.78E-15    |
| gene-Led04348-sp3 | 1.441594657  | 0.000338317 |
| gene-Led04351-sp3 | -1.483706724 | 0.000535753 |
| gene-Led04358-sp3 | -0.777115125 | 0.00617359  |
| gene-Led04362-sp3 | 0.724386811  | 0.000139706 |
| gene-Led04363-sp3 | 0.767452468  | 0.000576638 |
| gene-Led04364-sp3 | 0.529495787  | 0.001895405 |
| gene-Led04370-sp3 | -3.161569103 | 0.000216845 |
| gene-Led04391-sp3 | 1.955009104  | 3.02E-13    |
| gene-Led04402-sp3 | 0.676448298  | 0.0000777   |
| gene-Led04429-sp3 | -1.516790926 | 2.77E-13    |
| gene-Led04444-sp3 | -0.865086369 | 0.00056083  |
| gene-Led04450-sp3 | -0.976879186 | 0.009186028 |
| gene-Led04463-sp3 | 0.913831891  | 0.000120562 |
| gene-Led04471-sp3 | -0.456849959 | 0.004426228 |
| gene-Led04483-sp3 | -3.200781462 | 3.88E-08    |
| gene-Led04484-sp3 | -3.467088136 | 0.0000572   |
| gene-Led04499-sp3 | 2.460229229  | 1.09E-20    |
| gene-Led04512-sp3 | 0.793236263  | 0.006357213 |
| gene-Led04519-sp3 | -1.415582826 | 0.00000197  |
| gene-Led04523-sp3 | 0.464246012  | 0.000863449 |
| gene-Led04557-sp3 | 0.733976923  | 0.004297177 |
| gene-Led04558-sp3 | 1.488731413  | 0.00000101  |
| gene-Led04559-sp3 | 0.573067001  | 0.008924978 |
| gene-Led04560-sp3 | 0.782125204  | 0.0000173   |
| gene-Led04562-sp3 | -1.006342857 | 0.000289771 |
| gene-Led04568-sp3 | -1.209342458 | 0.0000119   |
| gene-Led04569-sp3 | 0.639860371  | 0.0000106   |
| gene-Led04592-sp3 | -1.02537851  | 0.000954688 |
| gene-Led04602-sp3 | 0.66294267   | 0.004351122 |
| gene-Led04604-sp3 | 1.682900728  | 0.0000635   |
| gene-Led04617-sp3 | -3.674471279 | 3.28E-18    |
| gene-Led04642-sp3 | -0.97222246  | 0.000104271 |
| gene-Led04649-sp3 | -1.969256384 | 0.000000602 |
| gene-Led04656-sp3 | 0.51091539   | 0.006291579 |
| gene-Led04663-sp3 | 1.006664771  | 0.0000459   |
| gene-Led04680-sp3 | 0.821290976  | 0.009199789 |

|                   |              |             |
|-------------------|--------------|-------------|
| gene-Led04683-sp3 | -5.982927662 | 1.32E-21    |
| gene-Led04704-sp3 | -0.63547437  | 0.008922933 |
| gene-Led04755-sp3 | 1.032236914  | 3.03E-09    |
| gene-Led04763-sp3 | 0.955174418  | 0.000117837 |
| gene-Led04764-sp3 | -0.680103832 | 0.000672889 |
| gene-Led04771-sp3 | 1.294518875  | 0.00000718  |
| gene-Led04796-sp3 | -2.333665332 | 1.06E-08    |
| gene-Led04806-sp3 | -2.601382337 | 3.43E-10    |
| gene-Led04816-sp3 | -1.763378613 | 8.48E-08    |
| gene-Led04817-sp3 | -1.082779394 | 0.000000867 |
| gene-Led04817-sp3 | -0.809490447 | 0.0000588   |
| gene-Led04882-sp3 | -0.678402457 | 0.001138184 |
| gene-Led04883-sp3 | -0.915106157 | 0.004004534 |
| gene-Led04911-sp3 | -1.438602984 | 0.000918898 |
| gene-Led04921-sp3 | 0.564930092  | 0.001346555 |
| gene-Led04942-sp3 | -0.548131423 | 0.009351982 |
| gene-Led04945-sp3 | -1.812424288 | 2.49E-17    |
| gene-Led04946-sp3 | -1.532034828 | 0.0000132   |
| gene-Led04948-sp3 | 0.997711897  | 0.003628956 |
| gene-Led04949-sp3 | -1.285108146 | 2.36E-10    |
| gene-Led04950-sp3 | -0.867665036 | 0.00000813  |
| gene-Led04955-sp3 | 1.223909335  | 8.1E-09     |
| gene-Led04958-sp3 | 2.859878983  | 5.23E-22    |
| gene-Led04959-sp3 | 1.48442019   | 0.000266292 |
| gene-Led04960-sp3 | 1.424636467  | 0.000000796 |
| gene-Led04968-sp3 | 0.466585652  | 0.008657436 |
| gene-Led04975-sp3 | -1.041478311 | 0.000000565 |
| gene-Led04976-sp3 | -1.661733732 | 0.000262847 |
| gene-Led04982-sp3 | 0.547392805  | 0.001289219 |
| gene-Led05015-sp3 | -2.086354238 | 0.0048883   |
| gene-Led05017-sp3 | 1.613176714  | 0.000000594 |
| gene-Led05022-sp3 | -4.466924298 | 4.95E-21    |
| gene-Led05031-sp3 | -0.996441325 | 0.002767612 |
| gene-Led05036-sp3 | -1.601487472 | 0.00000482  |
| gene-Led05039-sp3 | -1.865526841 | 0.000000356 |
| gene-Led05049-sp3 | 0.891728313  | 0.000523434 |
| gene-Led05054-sp3 | 2.418138246  | 0.003605228 |
| gene-Led05056-sp3 | 1.401931148  | 0.00000701  |
| gene-Led05062-sp3 | -1.888457517 | 0.0000069   |
| gene-Led05063-sp3 | -2.514087088 | 3.07E-08    |
| gene-Led05068-sp3 | 1.624337249  | 9.48E-09    |
| gene-Led05069-sp3 | 0.55652376   | 0.004951833 |
| gene-Led05082-sp3 | 0.847387794  | 0.004242001 |
| gene-Led05085-sp3 | 0.455846772  | 0.003954807 |



|                   |              |             |
|-------------------|--------------|-------------|
| gene-Led05087-sp3 | 2.194060195  | 0.00000631  |
| gene-Led05094-sp3 | 0.894669981  | 0.001684767 |
| gene-Led05095-sp3 | -1.630659298 | 1.73E-11    |
| gene-Led05098-sp3 | 0.474746129  | 0.002849504 |
| gene-Led05099-sp3 | 0.617071819  | 0.00295085  |
| gene-Led05105-sp3 | -1.426905577 | 0.0000122   |
| gene-Led05116-sp3 | 0.494253925  | 0.00424867  |
| gene-Led05123-sp3 | 1.945526725  | 3.09E-08    |
| gene-Led05126-sp3 | -2.227370315 | 8.96E-08    |
| gene-Led05130-sp3 | -2.715465641 | 6.73E-26    |
| gene-Led05133-sp3 | -3.956665623 | 2.03E-12    |
| gene-Led05139-sp3 | 1.404106716  | 0.000535701 |
| gene-Led05144-sp3 | 0.932542509  | 0.000000204 |
| gene-Led05169-sp3 | 0.864317651  | 0.006288025 |
| gene-Led05176-sp3 | 1.172202398  | 0.001623494 |
| gene-Led05203-sp3 | -1.114057625 | 6.44E-10    |
| gene-Led05207-sp3 | -2.898823759 | 4.14E-12    |
| gene-Led05223-sp3 | 0.667199777  | 0.002571661 |
| gene-Led05224-sp3 | -1.158927921 | 0.000318752 |
| gene-Led05230-sp3 | -0.77698188  | 0.00000821  |
| gene-Led05248-sp3 | 0.635646629  | 0.00098636  |
| gene-Led05265-sp3 | -0.686722214 | 0.000477782 |
| gene-Led05273-sp3 | 0.879376737  | 0.000129387 |
| gene-Led05285-sp3 | 1.300072701  | 0.000422039 |
| gene-Led05300-sp3 | 1.088170104  | 0.00000444  |
| gene-Led05321-sp3 | 0.554666742  | 0.000323102 |
| gene-Led05329-sp3 | -0.821370618 | 0.0000216   |
| gene-Led05331-sp3 | 0.598220351  | 0.001584572 |
| gene-Led05340-sp3 | 1.097897215  | 1.1E-14     |
| gene-Led05388-sp3 | 0.409113392  | 0.008890476 |
| gene-Led05402-sp3 | 0.608570459  | 0.001318521 |
| gene-Led05458-sp3 | 0.773095418  | 0.000023    |
| gene-Led05462-sp3 | -0.629670213 | 0.001069384 |
| gene-Led05539-sp3 | 1.45544501   | 0.000022    |
| gene-Led05540-sp3 | 0.814647441  | 0.000148788 |
| gene-Led05558-sp3 | -0.802765348 | 0.000688884 |
| gene-Led05561-sp3 | -1.126559985 | 0.000704178 |
| gene-Led05570-sp3 | 2.704449644  | 9.39E-14    |
| gene-Led05578-sp3 | 1.179002146  | 0.000476917 |
| gene-Led05587-sp3 | -0.840431117 | 0.004213177 |
| gene-Led05589-sp3 | -0.687071721 | 0.001461136 |
| gene-Led05591-sp3 | 0.734574212  | 0.000885502 |
| gene-Led05601-sp3 | 0.383722865  | 0.007158071 |
| gene-Led05631-sp3 | 1.282152639  | 0.00012881  |

|                   |              |             |
|-------------------|--------------|-------------|
| gene-Led05652-sp3 | 0.709593396  | 0.0000145   |
| gene-Led05658-sp3 | -1.470457959 | 0.000000999 |
| gene-Led05669-sp3 | 0.442815306  | 0.00137781  |
| gene-Led05686-sp3 | 0.556351796  | 0.001650508 |
| gene-Led05693-sp3 | -1.456127933 | 6.09E-09    |
| gene-Led05698-sp3 | -2.033052994 | 0.00000931  |
| gene-Led05718-sp3 | -1.75172034  | 0.0000256   |
| gene-Led05719-sp3 | 0.772275416  | 0.0000923   |
| gene-Led05728-sp3 | 1.933369396  | 1.01E-12    |
| gene-Led05740-sp3 | -0.658036635 | 0.004628869 |
| gene-Led05743-sp3 | 0.74519546   | 0.005809117 |
| gene-Led05747-sp3 | -0.891149763 | 0.000598257 |
| gene-Led05770-sp3 | -1.651551911 | 2.94E-09    |
| gene-Led05778-sp3 | 0.455445401  | 0.002109068 |
| gene-Led05789-sp3 | 1.049702052  | 0.000000116 |
| gene-Led05795-sp3 | 1.434121475  | 0.002074984 |
| gene-Led05802-sp3 | 0.595771808  | 0.000105026 |
| gene-Led05807-sp3 | 0.684662426  | 0.000590346 |
| gene-Led05837-sp3 | 0.558040233  | 0.0004319   |
| gene-Led05862-sp3 | -0.748270362 | 0.000213294 |
| gene-Led05864-sp3 | 0.777008309  | 2.19E-08    |
| gene-Led05881-sp3 | 1.292327788  | 0.000000143 |
| gene-Led05883-sp3 | -0.496346298 | 0.007580422 |
| gene-Led05887-sp3 | -0.680493927 | 0.008706897 |
| gene-Led05902-sp3 | 1.19803569   | 0.000151696 |
| gene-Led05916-sp3 | -0.681784437 | 0.000440792 |
| gene-Led05919-sp3 | 0.734337187  | 0.004299181 |
| gene-Led05934-sp3 | 0.869511602  | 0.000361969 |
| gene-Led05940-sp3 | -1.077742044 | 0.000000023 |
| gene-Led05961-sp3 | 3.220563648  | 0.0000755   |
| gene-Led05983-sp3 | 2.792105397  | 0.00098603  |
| gene-Led05986-sp3 | 1.066081212  | 0.000056    |
| gene-Led06007-sp3 | 0.843475918  | 0.004031366 |
| gene-Led06015-sp3 | 1.218585517  | 0.006462665 |
| gene-Led06029-sp3 | 1.563870501  | 0.000000179 |
| gene-Led06031-sp3 | -0.902259222 | 0.0000771   |
| gene-Led06046-sp3 | 4.022083172  | 0.000581687 |
| gene-Led06051-sp3 | 0.747591384  | 0.0016977   |
| gene-Led06053-sp3 | 1.720815668  | 0.008824236 |
| gene-Led06055-sp3 | 0.962695007  | 0.000374534 |
| gene-Led06075-sp3 | 1.783943428  | 0.0000118   |
| gene-Led06084-sp3 | 0.696806289  | 0.003919103 |
| gene-Led06118-sp3 | 0.848787878  | 0.003285872 |
| gene-Led06124-sp3 | -1.574809382 | 4.33E-13    |

|                   |              |             |
|-------------------|--------------|-------------|
| gene-Led06138-sp3 | -1.016707804 | 0.000000172 |
| gene-Led06142-sp3 | -0.60869923  | 0.001925157 |
| gene-Led06148-sp3 | -2.173115303 | 0.00401513  |
| gene-Led06149-sp3 | -2.868235991 | 1.17E-28    |
| gene-Led06150-sp3 | -2.631309485 | 1.34E-24    |
| gene-Led06162-sp3 | -3.450613155 | 4.84E-08    |
| gene-Led06165-sp3 | 1.327094296  | 2.27E-10    |
| gene-Led06217-sp3 | 2.056331501  | 0.000387045 |
| gene-Led06227-sp3 | 1.591223261  | 0.0000502   |
| gene-Led06254-sp3 | 0.458584735  | 0.003159346 |
| gene-Led06261-sp3 | -1.286712258 | 0.0000914   |
| gene-Led06265-sp3 | -1.430851636 | 0.00000177  |
| gene-Led06315-sp3 | -1.122450237 | 0.000339705 |
| gene-Led06338-sp3 | 3.431992586  | 1.01E-41    |
| gene-Led06347-sp3 | 1.858600181  | 3.9E-15     |
| gene-Led06349-sp3 | 1.135899608  | 0.001087584 |
| gene-Led06356-sp3 | 1.315007354  | 0.003288051 |
| gene-Led06363-sp3 | 0.67930194   | 0.000116149 |
| gene-Led06365-sp3 | 0.606565427  | 0.003713694 |
| gene-Led06367-sp3 | -3.222968219 | 8.04E-08    |
| gene-Led06391-sp3 | -4.945684399 | 2.6E-72     |
| gene-Led06391-sp3 | -4.773953532 | 2.03E-39    |
| gene-Led06391-sp3 | -4.17205534  | 0.0000357   |
| gene-Led06420-sp3 | 1.069383808  | 0.008599547 |
| gene-Led06448-sp3 | 0.515553461  | 0.009331302 |
| gene-Led06456-sp3 | -1.022157985 | 0.0000288   |
| gene-Led06464-sp3 | 1.244272026  | 0.0000276   |
| gene-Led06477-sp3 | -1.100386635 | 0.000827678 |
| gene-Led06479-sp3 | -1.072223464 | 0.004727081 |
| gene-Led06483-sp3 | -0.892548211 | 0.00000382  |
| gene-Led06492-sp3 | -0.859369991 | 0.000262391 |
| gene-Led06514-sp3 | -1.469575417 | 0.00000834  |
| gene-Led06518-sp3 | 0.539628567  | 0.002235852 |
| gene-Led06524-sp3 | 0.933119576  | 0.00000214  |
| gene-Led06526-sp3 | 0.853561246  | 0.000103752 |
| gene-Led06530-sp3 | 2.424252364  | 1.69E-14    |
| gene-Led06546-sp3 | 4.023459759  | 2.43E-40    |
| gene-Led06547-sp3 | -1.675402492 | 0.0000459   |
| gene-Led06561-sp3 | -0.462806282 | 0.009111346 |
| gene-Led06582-sp3 | -2.372080926 | 2.71E-21    |
| gene-Led06598-sp3 | 0.94078762   | 0.00000145  |
| gene-Led06602-sp3 | 0.758809851  | 0.000124765 |
| gene-Led06603-sp3 | -1.692773393 | 0.000000825 |
| gene-Led06637-sp3 | 0.644255282  | 0.00018522  |

|                   |              |             |
|-------------------|--------------|-------------|
| gene-Led06642-sp3 | 1.683181773  | 0.000000154 |
| gene-Led06646-sp3 | 0.748680605  | 0.0000003   |
| gene-Led06661-sp3 | 0.528333511  | 0.003226647 |
| gene-Led06674-sp3 | 0.691316992  | 0.000372868 |
| gene-Led06679-sp3 | -0.947865143 | 0.0000963   |
| gene-Led06732-sp3 | 2.385085397  | 0.0000275   |
| gene-Led06754-sp3 | -0.807079629 | 0.002804069 |
| gene-Led06772-sp3 | 1.510247575  | 0.00000165  |
| gene-Led06782-sp3 | 1.391141785  | 0.00000896  |
| gene-Led06798-sp3 | -1.115896302 | 0.000757316 |
| gene-Led06808-sp3 | 0.764158539  | 0.000293002 |
| gene-Led06827-sp3 | 1.750280038  | 0.000091    |
| gene-Led06842-sp3 | 0.610300866  | 0.003066184 |
| gene-Led06846-sp3 | 1.012724766  | 0.0000022   |
| gene-Led06848-sp3 | 2.758587885  | 0.0000003   |
| gene-Led06850-sp3 | 3.664787297  | 8.95E-16    |
| gene-Led06873-sp3 | -1.170959154 | 2.47E-09    |
| gene-Led06888-sp3 | 3.005360365  | 0.000000733 |
| gene-Led06911-sp3 | 1.096616341  | 0.002751702 |
| gene-Led06929-sp3 | -0.646413494 | 0.000526346 |
| gene-Led06931-sp3 | 1.188828358  | 0.000102499 |
| gene-Led06950-sp3 | 0.640321562  | 0.001872095 |
| gene-Led06957-sp3 | 1.396852481  | 1.01E-08    |
| gene-Led06994-sp3 | 0.83106801   | 0.003024078 |
| gene-Led06998-sp3 | -1.272445604 | 0.000000371 |
| gene-Led07008-sp3 | -1.441916232 | 0.000000618 |
| gene-Led07019-sp3 | 1.153848334  | 1.95E-08    |
| gene-Led07041-sp3 | -1.133348363 | 0.0000392   |
| gene-Led07043-sp3 | 1.88836735   | 0.00000373  |
| gene-Led07089-sp3 | 1.048617488  | 0.000000685 |
| gene-Led07092-sp3 | 1.344869941  | 0.000107334 |
| gene-Led07100-sp3 | -2.491813055 | 4.4E-10     |
| gene-Led07102-sp3 | -3.642714145 | 2.59E-40    |
| gene-Led07104-sp3 | -0.770907789 | 0.000149597 |
| gene-Led07136-sp3 | -0.941320214 | 0.003405433 |
| gene-Led07143-sp3 | 0.870648362  | 0.000197954 |
| gene-Led07148-sp3 | 3.338820656  | 3.33E-11    |
| gene-Led07155-sp3 | -1.606228939 | 0.000000045 |
| gene-Led07161-sp3 | -1.632109357 | 0.00000429  |
| gene-Led07180-sp3 | 2.096717498  | 1.47E-08    |
| gene-Led07183-sp3 | 6.242175355  | 5.41E-08    |
| gene-Led07201-sp3 | -1.57330193  | 0.000013    |
| gene-Led07204-sp3 | 2.181911974  | 7.26E-13    |
| gene-Led07205-sp3 | 0.728660597  | 0.008307348 |

|                   |              |             |
|-------------------|--------------|-------------|
| gene-Led07210-sp3 | 1.215557569  | 0.000000362 |
| gene-Led07217-sp3 | 1.642073143  | 1.59E-08    |
| gene-Led07218-sp3 | 1.27886016   | 0.000000443 |
| gene-Led07222-sp3 | 1.109690244  | 0.0000152   |
| gene-Led07224-sp3 | 1.794544176  | 2.31E-11    |
| gene-Led07234-sp3 | -0.58274189  | 0.003169862 |
| gene-Led07275-sp3 | 0.838970103  | 8.86E-08    |
| gene-Led07300-sp3 | 1.487864397  | 2.56E-12    |
| gene-Led07306-sp3 | 1.680078701  | 0.00502088  |
| gene-Led07313-sp3 | -0.774346664 | 0.007054276 |
| gene-Led07334-sp3 | 0.128657559  | 0.000215389 |
| gene-Led07334-sp3 | -0.523186855 | 0.003545859 |
| gene-Led07345-sp3 | 2.318045092  | 3.48E-14    |
| gene-Led07360-sp3 | 1.996931081  | 0.0000154   |
| gene-Led07362-sp3 | 0.493941828  | 0.00437805  |
| gene-Led07388-sp3 | 0.665042084  | 0.002410772 |
| gene-Led07391-sp3 | -1.538331787 | 0.000000555 |
| gene-Led07397-sp3 | 0.669624467  | 0.00296859  |
| gene-Led07404-sp3 | -2.739799168 | 1.63E-09    |
| gene-Led07405-sp3 | 0.488794225  | 0.005985058 |
| gene-Led07419-sp3 | 0.840837628  | 0.000407095 |
| gene-Led07430-sp3 | 1.359903614  | 0.004995175 |
| gene-Led07465-sp3 | 0.678235526  | 0.000304844 |
| gene-Led07476-sp3 | 0.510421473  | 0.004515098 |
| gene-Led07486-sp3 | -0.452908454 | 0.005122716 |
| gene-Led07489-sp3 | 0.612634573  | 0.000405576 |
| gene-Led07495-sp3 | -0.632959361 | 0.000177117 |
| gene-Led07502-sp3 | 0.740018816  | 0.00004     |
| gene-Led07506-sp3 | -0.512730546 | 0.009567711 |
| gene-Led07517-sp3 | -0.509042969 | 0.008777401 |
| gene-Led07525-sp3 | -0.869807563 | 0.0000128   |
| gene-Led07526-sp3 | 2.994588086  | 0.00000145  |
| gene-Led07546-sp3 | 0.569270361  | 0.000972056 |
| gene-Led07568-sp3 | 0.474333271  | 0.006168021 |
| gene-Led07587-sp3 | -0.778944866 | 0.001483827 |
| gene-Led07592-sp3 | 2.469887673  | 2.43E-18    |
| gene-Led07595-sp3 | -4.614646538 | 7.79E-46    |
| gene-Led07596-sp3 | -0.991345016 | 0.001909197 |
| gene-Led07626-sp3 | 1.00587288   | 0.000000875 |
| gene-Led07637-sp3 | 0.524274854  | 0.003689528 |
| gene-Led07646-sp3 | -0.72268659  | 0.0000742   |
| gene-Led07695-sp3 | 0.783757475  | 0.00000414  |
| gene-Led07697-sp3 | 2.72157644   | 6.99E-11    |
| gene-Led07706-sp3 | 1.070513476  | 0.000907998 |

|                   |              |             |
|-------------------|--------------|-------------|
| gene-Led07713-sp3 | -1.111116028 | 0.000215808 |
| gene-Led07718-sp3 | 0.509287459  | 0.007154559 |
| gene-Led07720-sp3 | 0.459338728  | 0.005092498 |
| gene-Led07738-sp3 | 0.675549738  | 0.000715637 |
| gene-Led07742-sp3 | 0.842675243  | 0.007680125 |
| gene-Led07744-sp3 | -2.113263991 | 0.0000178   |
| gene-Led07758-sp3 | 1.867503057  | 0.000167873 |
| gene-Led07765-sp3 | 0.50594749   | 0.005620196 |
| gene-Led07782-sp3 | -1.619623829 | 0.00000382  |
| gene-Led07788-sp3 | 0.796290365  | 0.0000689   |
| gene-Led07836-sp3 | 0.578015293  | 0.0012998   |
| gene-Led07845-sp3 | 1.034728172  | 0.000000929 |
| gene-Led07856-sp3 | 0.910623195  | 0.002349751 |
| gene-Led07861-sp3 | -0.617834978 | 0.004362134 |
| gene-Led07862-sp3 | 0.790267062  | 0.000000501 |
| gene-Led07864-sp3 | -0.715409245 | 0.001605802 |
| gene-Led07866-sp3 | 0.586877546  | 0.000668408 |
| gene-Led07898-sp3 | 0.768266732  | 0.00546115  |
| gene-Led07904-sp3 | -0.629914659 | 0.000864371 |
| gene-Led07908-sp3 | 1.243503896  | 0.00000686  |
| gene-Led07916-sp3 | 0.732743654  | 0.000103412 |
| gene-Led07917-sp3 | 1.519164244  | 0.000000789 |
| gene-Led07958-sp3 | -1.225315028 | 0.0000653   |
| gene-Led07979-sp3 | 0.692438668  | 0.000073    |
| gene-Led08009-sp3 | 0.443395154  | 0.005172368 |
| gene-Led08015-sp3 | 0.622782346  | 0.006435999 |
| gene-Led08026-sp3 | -1.706241564 | 0.0000592   |
| gene-Led08036-sp3 | 0.663124822  | 0.002337513 |
| gene-Led08044-sp3 | 0.386227522  | 0.006245175 |
| gene-Led08055-sp3 | 0.513333152  | 0.007810177 |
| gene-Led08072-sp3 | -1.142667823 | 0.001266076 |
| gene-Led08110-sp3 | 0.934672805  | 0.00000257  |
| gene-Led08112-sp3 | 0.524448826  | 0.005948932 |
| gene-Led08165-sp3 | 1.921514074  | 0.000297167 |
| gene-Led08168-sp3 | 1.937678585  | 0.000000305 |
| gene-Led08169-sp3 | 0.817662297  | 0.000116572 |
| gene-Led08177-sp3 | 1.028742074  | 0.007903234 |
| gene-Led08181-sp3 | 1.281513416  | 0.00033334  |
| gene-Led08184-sp3 | 2.053807066  | 5.61E-19    |
| gene-Led08187-sp3 | 2.120769366  | 5.32E-08    |
| gene-Led08195-sp3 | 1.653394542  | 0.002023439 |
| gene-Led08200-sp3 | 1.354151878  | 0.0000113   |
| gene-Led08203-sp3 | -0.521164408 | 0.00183929  |
| gene-Led08210-sp3 | 1.280328486  | 0.000000023 |

|                   |              |             |
|-------------------|--------------|-------------|
| gene-Led08217-sp3 | -3.355995021 | 3.86E-20    |
| gene-Led08218-sp3 | -2.552982442 | 1.01E-16    |
| gene-Led08224-sp3 | 2.279154129  | 0.00000595  |
| gene-Led08238-sp3 | 1.710411227  | 0.000000173 |
| gene-Led08257-sp3 | -1.710447182 | 0.000013    |
| gene-Led08281-sp3 | 0.603022267  | 0.000407852 |
| gene-Led08389-sp3 | -0.915412961 | 0.0000507   |
| gene-Led08422-sp3 | -0.653204678 | 0.009898437 |
| gene-Led08431-sp3 | 0.843638578  | 0.00000124  |
| gene-Led08432-sp3 | 0.74076322   | 0.000202712 |
| gene-Led08448-sp3 | 1.773336691  | 8.83E-14    |
| gene-Led08460-sp3 | -3.487333834 | 6.28E-15    |
| gene-Led08464-sp3 | -0.868957262 | 0.009594897 |
| gene-Led08465-sp3 | -0.819437782 | 0.001731718 |
| gene-Led08483-sp3 | 2.416970745  | 0.000317048 |
| gene-Led08489-sp3 | 0.874103051  | 0.000195772 |
| gene-Led08508-sp3 | 0.555836667  | 0.000803582 |
| gene-Led08516-sp3 | 0.964048846  | 0.00000949  |
| gene-Led08569-sp3 | -1.548090347 | 0.000000129 |
| gene-Led08597-sp3 | -0.603388148 | 0.002932794 |
| gene-Led08608-sp3 | -2.844143693 | 0.0000269   |
| gene-Led08610-sp3 | 0.871039507  | 0.000589553 |
| gene-Led08622-sp3 | -3.814135825 | 6.02E-32    |
| gene-Led08624-sp3 | -5.330798719 | 1.25E-14    |
| gene-Led08625-sp3 | -2.507051345 | 6.57E-13    |
| gene-Led08636-sp3 | -1.832683793 | 2.2E-11     |
| gene-Led08645-sp3 | -1.59187156  | 0.00000405  |
| gene-Led08657-sp3 | 1.730032454  | 0.001840169 |
| gene-Led08658-sp3 | 1.990078029  | 0.00000353  |
| gene-Led08658-sp3 | 1.609766993  | 0.00300507  |
| gene-Led08659-sp3 | 1.084324857  | 0.000430766 |
| gene-Led08669-sp3 | 0.733786935  | 0.001108212 |
| gene-Led08682-sp3 | 1.558897969  | 0.000000254 |
| gene-Led08683-sp3 | 0.733496053  | 0.000181735 |
| gene-Led08690-sp3 | -1.584544563 | 0.000529951 |
| gene-Led08695-sp3 | -0.817654285 | 0.007386204 |
| gene-Led08706-sp3 | -1.824012242 | 8.52E-08    |
| gene-Led08715-sp3 | -0.725313269 | 0.001880887 |
| gene-Led08733-sp3 | -0.90064897  | 0.000251502 |
| gene-Led08734-sp3 | -3.737501512 | 5.61E-17    |
| gene-Led08742-sp3 | -1.360063994 | 0.001922743 |
| gene-Led08744-sp3 | 1.245249578  | 0.00066553  |
| gene-Led08745-sp3 | -0.496075956 | 0.002694418 |
| gene-Led08757-sp3 | -1.383802018 | 1.36E-08    |

|                   |              |             |
|-------------------|--------------|-------------|
| gene-Led08786-sp3 | -0.603385675 | 0.005545343 |
| gene-Led08827-sp3 | -0.919359298 | 0.000000026 |
| gene-Led08839-sp3 | -0.967640346 | 0.004680694 |
| gene-Led08840-sp3 | -1.161902218 | 0.002718315 |
| gene-Led08870-sp3 | 0.806498257  | 0.007904412 |
| gene-Led08877-sp3 | -1.081518213 | 3.12E-09    |
| gene-Led08878-sp3 | 0.73197062   | 0.00000581  |
| gene-Led08885-sp3 | -0.749735713 | 0.000920683 |
| gene-Led08887-sp3 | 0.490775469  | 0.000285214 |
| gene-Led08896-sp3 | -1.40195914  | 0.000207663 |
| gene-Led08924-sp3 | 1.495757833  | 0.00000895  |
| gene-Led08945-sp3 | -1.073319547 | 0.004065415 |
| gene-Led08999-sp3 | -1.337951859 | 8.07E-10    |
| gene-Led09023-sp3 | 0.814654447  | 0.000650674 |
| gene-Led09039-sp3 | 0.760096214  | 0.003999075 |
| gene-Led09044-sp3 | 0.621256096  | 0.000979941 |
| gene-Led09054-sp3 | -0.823001894 | 0.00000345  |
| gene-Led09059-sp3 | -1.045520738 | 0.00000151  |
| gene-Led09068-sp3 | 0.935063182  | 0.000166464 |
| gene-Led09096-sp3 | 0.993164611  | 5.52E-08    |
| gene-Led09126-sp3 | -1.072071279 | 0.0000111   |
| gene-Led09145-sp3 | 0.745676062  | 0.005654548 |
| gene-Led09160-sp3 | -0.711999026 | 0.006030245 |
| gene-Led09161-sp3 | -1.676816424 | 0.000000995 |
| gene-Led09163-sp3 | 0.55660616   | 0.001302742 |
| gene-Led09175-sp3 | 0.922090082  | 0.0000111   |
| gene-Led09177-sp3 | 1.712560791  | 0.001941961 |
| gene-Led09201-sp3 | 0.878169967  | 0.0000902   |
| gene-Led09207-sp3 | 0.557577492  | 0.001014437 |
| gene-Led09216-sp3 | 0.542650894  | 0.003422605 |
| gene-Led09248-sp3 | 0.818305533  | 0.0000622   |
| gene-Led09252-sp3 | 0.696485457  | 0.001037738 |
| gene-Led09255-sp3 | 0.731777497  | 0.004017787 |
| gene-Led09259-sp3 | 0.918553533  | 0.00153992  |
| gene-Led09264-sp3 | 0.518476695  | 0.002419869 |
| gene-Led09270-sp3 | -1.310725203 | 0.00000215  |
| gene-Led09275-sp3 | 0.586283407  | 0.000603    |
| gene-Led09277-sp3 | -0.989398628 | 0.002647685 |
| gene-Led09291-sp3 | 0.510267001  | 0.003324884 |
| gene-Led09311-sp3 | 1.009432242  | 0.004931147 |
| gene-Led09321-sp3 | 0.628582576  | 0.009480953 |
| gene-Led09364-sp3 | -0.994858995 | 0.001499443 |
| gene-Led09371-sp3 | 0.705443616  | 0.0000105   |
| gene-Led09374-sp3 | 1.56212788   | 0.003477128 |



|                   |              |             |
|-------------------|--------------|-------------|
| gene-Led09378-sp3 | 2.178915299  | 0.0000463   |
| gene-Led09386-sp3 | -1.747355696 | 0.001410528 |
| gene-Led09411-sp3 | -0.720406537 | 0.0078772   |
| gene-Led09418-sp3 | 1.489727659  | 7.53E-09    |
| gene-Led09420-sp3 | -1.046495899 | 0.000894303 |
| gene-Led09424-sp3 | 0.949400583  | 0.000326835 |
| gene-Led09430-sp3 | 1.016733314  | 8.74E-11    |
| gene-Led09431-sp3 | 1.051372756  | 0.000000642 |
| gene-Led09437-sp3 | 0.929519439  | 4.46E-08    |
| gene-Led09438-sp3 | 0.867158461  | 4.73E-10    |
| gene-Led09446-sp3 | 0.736590424  | 0.001590482 |
| gene-Led09450-sp3 | -0.79040274  | 0.000474932 |
| gene-Led09462-sp3 | -1.459485228 | 0.001583837 |
| gene-Led09479-sp3 | -1.027165312 | 0.000142917 |
| gene-Led09499-sp3 | 0.818219897  | 0.001337484 |
| gene-Led09516-sp3 | 0.68948712   | 0.000802499 |
| gene-Led09519-sp3 | -1.187218291 | 0.000275717 |
| gene-Led09543-sp3 | 0.846679842  | 0.004514698 |
| gene-Led09557-sp3 | -1.743569143 | 4.74E-08    |
| gene-Led09577-sp3 | -1.904626272 | 0.00000191  |
| gene-Led09598-sp3 | -0.579268867 | 0.00672637  |
| gene-Led09604-sp3 | 0.769204748  | 0.0000521   |
| gene-Led09616-sp3 | -1.62888998  | 0.00000172  |
| gene-Led09617-sp3 | -1.442619109 | 2.55E-09    |
| gene-Led09635-sp3 | 1.930178167  | 0.002697809 |
| gene-Led09680-sp3 | 0.847464558  | 0.000437673 |
| gene-Led09685-sp3 | 1.138089794  | 0.000740811 |
| gene-Led09696-sp3 | -0.987763444 | 1.36E-09    |
| gene-Led09711-sp3 | 0.74546439   | 0.006733237 |
| gene-Led09714-sp3 | 0.720417198  | 0.00674793  |
| gene-Led09763-sp3 | 0.691473974  | 0.00000954  |
| gene-Led09806-sp3 | 1.930821767  | 0.001788275 |
| gene-Led09812-sp3 | -1.108262202 | 0.000522916 |
| gene-Led09813-sp3 | -1.092733325 | 0.000245312 |
| gene-Led09825-sp3 | 0.690341381  | 0.000162536 |
| gene-Led09836-sp3 | 1.375267198  | 0.0000317   |
| gene-Led09839-sp3 | -0.448483221 | 0.005032073 |
| gene-Led09846-sp3 | -0.611059961 | 0.000774882 |
| gene-Led09866-sp3 | 0.531145498  | 0.003838267 |
| gene-Led09880-sp3 | -0.679028298 | 0.00711465  |
| gene-Led09885-sp3 | -1.070847551 | 0.0000102   |
| gene-Led09897-sp3 | 0.992474917  | 0.005676677 |
| gene-Led09997-sp3 | 1.997267878  | 0.002210869 |
| gene-Led10005-sp3 | 1.797943734  | 0.000107839 |

|                   |              |             |
|-------------------|--------------|-------------|
| gene-Led10006-sp3 | 2.245954928  | 3.76E-09    |
| gene-Led10016-sp3 | 0.539590817  | 0.004264417 |
| gene-Led10034-sp3 | -0.660377158 | 0.000531656 |
| gene-Led10046-sp3 | -1.119399951 | 0.00000514  |
| gene-Led10050-sp3 | 0.972868077  | 0.0000134   |
| gene-Led10065-sp3 | 1.08180845   | 0.0000128   |
| gene-Led10088-sp3 | 0.568664605  | 0.00616023  |
| gene-Led10099-sp3 | -1.386516351 | 0.0000743   |
| gene-Led10102-sp3 | 0.490171919  | 0.002828294 |
| gene-Led10108-sp3 | 2.128231983  | 0.002663661 |
| gene-Led10111-sp3 | 0.61824521   | 0.003894154 |
| gene-Led10121-sp3 | 0.88255838   | 0.001156467 |
| gene-Led10122-sp3 | 0.573536023  | 0.003747512 |
| gene-Led10123-sp3 | 0.94807715   | 5.62E-08    |
| gene-Led10145-sp3 | -0.543435016 | 0.000722332 |
| gene-Led10158-sp3 | -0.502124982 | 0.00620474  |
| gene-Led10163-sp3 | 0.948224492  | 0.002190991 |
| gene-Led10175-sp3 | -1.537823967 | 0.001534419 |
| gene-Led10175-sp3 | -5.580098194 | 0.0000471   |
| gene-Led10176-sp3 | 0.650122364  | 0.001065526 |
| gene-Led10184-sp3 | 1.845958219  | 2.99E-10    |
| gene-Led10205-sp3 | 0.534240356  | 0.00126666  |
| gene-Led10225-sp3 | 0.817101405  | 0.0000784   |
| gene-Led10228-sp3 | -1.077001623 | 0.0000374   |
| gene-Led10235-sp3 | -3.813696675 | 0.000000721 |
| gene-Led10238-sp3 | -1.71812405  | 0.000294952 |
| gene-Led10246-sp3 | 1.667812723  | 1.32E-21    |
| gene-Led10299-sp3 | -0.915582021 | 0.004298376 |
| gene-Led10300-sp3 | -1.269870761 | 0.000269646 |
| gene-Led10303-sp3 | -1.212482566 | 0.000748245 |
| gene-Led10312-sp3 | 2.077856978  | 1.17E-08    |
| gene-Led10316-sp3 | 2.054330269  | 2.19E-09    |
| gene-Led10321-sp3 | -1.565266231 | 0.000305829 |
| gene-Led10322-sp3 | 2.137182068  | 0.0000136   |
| gene-Led10323-sp3 | -1.77792436  | 0.000000718 |
| gene-Led10329-sp3 | 0.84437723   | 0.001916538 |
| gene-Led10330-sp3 | 0.718048471  | 0.00304364  |
| gene-Led10340-sp3 | 1.443778908  | 0.0000225   |
| gene-Led10344-sp3 | -0.963329186 | 0.001566625 |
| gene-Led10352-sp3 | -1.517839263 | 0.001658192 |
| gene-Led10354-sp3 | 0.890641312  | 0.001704489 |
| gene-Led10375-sp3 | -0.818966374 | 0.0000481   |
| gene-Led10376-sp3 | -1.219896012 | 0.00000759  |
| gene-Led10469-sp3 | 0.420210753  | 0.007031605 |

|                   |              |             |
|-------------------|--------------|-------------|
| gene-Led10477-sp3 | 1.405193441  | 0.000132932 |
| gene-Led10479-sp3 | 2.442586074  | 5.32E-15    |
| gene-Led10482-sp3 | -1.180574007 | 0.000867451 |
| gene-Led10483-sp3 | -3.103696063 | 5.42E-17    |
| gene-Led10484-sp3 | -2.80759502  | 1.85E-26    |
| gene-Led10490-sp3 | -1.601503273 | 0.000000307 |
| gene-Led10492-sp3 | -1.260024801 | 2.73E-08    |
| gene-Led10526-sp3 | -1.931456989 | 5.58E-14    |
| gene-Led10530-sp3 | 0.841469358  | 0.000482478 |
| gene-Led10531-sp3 | -1.998705187 | 7.36E-19    |
| gene-Led10551-sp3 | 1.276397662  | 0.005180956 |
| gene-Led10555-sp3 | -2.965314897 | 1.47E-23    |
| gene-Led10567-sp3 | 0.835139993  | 0.000370752 |
| gene-Led10581-sp3 | 2.789020595  | 0.0000852   |
| gene-Led10588-sp3 | 0.86948554   | 0.000000662 |
| gene-Led10596-sp3 | -0.945078276 | 0.006594021 |
| gene-Led10615-sp3 | -0.37750264  | 0.009932571 |
| gene-Led10621-sp3 | 2.449999751  | 0.0000148   |
| gene-Led10627-sp3 | -0.715301562 | 0.001296543 |
| gene-Led10631-sp3 | 0.566899955  | 0.003096593 |
| gene-Led10639-sp3 | 0.93694814   | 0.000772787 |
| gene-Led10643-sp3 | 0.775801923  | 0.000087    |
| gene-Led10683-sp3 | -0.706799225 | 0.005199946 |
| gene-Led10690-sp3 | -1.269800064 | 4.13E-08    |
| gene-Led10693-sp3 | 0.965337187  | 0.001975686 |
| gene-Led10728-sp3 | -0.531004941 | 0.001569526 |
| gene-Led10733-sp3 | 0.584706006  | 0.004264479 |
| gene-Led10735-sp3 | 1.108950642  | 1.34E-08    |
| gene-Led10745-sp3 | 0.448573589  | 0.009507922 |
| gene-Led10763-sp3 | -0.877674758 | 0.0000965   |
| gene-Led10765-sp3 | -0.805240852 | 0.00000711  |
| gene-Led10768-sp3 | 0.750790663  | 0.000369029 |
| gene-Led10771-sp3 | -1.026964344 | 0.0000117   |
| gene-Led10800-sp3 | -1.794501518 | 0.003013945 |
| gene-Led10808-sp3 | -2.010170851 | 0.0000398   |
| gene-Led10875-sp3 | 1.212402527  | 5.92E-08    |
| gene-Led10879-sp3 | 0.728034418  | 0.0000699   |
| gene-Led10897-sp3 | 1.487026698  | 0.000000381 |
| gene-Led10913-sp3 | 2.653673574  | 0.0000402   |
| gene-Led10925-sp3 | 1.082347099  | 0.0000101   |
| gene-Led10927-sp3 | 2.247854762  | 2.58E-08    |
| gene-Led10936-sp3 | 0.600265851  | 0.004104367 |
| gene-Led10998-sp3 | 0.96203441   | 0.0000659   |
| gene-Led11014-sp3 | 1.067653057  | 1.06E-08    |

|                   |              |             |
|-------------------|--------------|-------------|
| gene-Led11016-sp3 | -0.92899682  | 0.000298742 |
| gene-Led11023-sp3 | 1.766167341  | 0.000123704 |
| gene-Led11048-sp3 | -1.673306805 | 0.002352296 |
| gene-Led11071-sp3 | -2.193064264 | 0.000372525 |
| gene-Led11086-sp3 | 0.840951646  | 0.00796871  |
| gene-Led11091-sp3 | 1.227972556  | 0.0000793   |
| gene-Led11122-sp3 | -4.466924298 | 4.95E-21    |
| gene-Led11139-sp3 | 1.107791806  | 0.000046    |
| gene-Led11182-sp3 | -0.8172673   | 0.0000117   |
| gene-Led11190-sp3 | 0.533848916  | 0.001541775 |
| gene-Led11194-sp3 | 1.901426183  | 0.000368429 |
| gene-Led11203-sp3 | -2.566750245 | 3.9E-13     |
| gene-Led11211-sp3 | -1.206727334 | 0.00000244  |
| gene-Led11212-sp3 | 1.069383808  | 0.008599547 |
| gene-Led11234-sp3 | 3.049616694  | 7.47E-23    |
| gene-Led11235-sp3 | 1.108462569  | 0.000563881 |
| gene-Led11264-sp3 | 1.105317448  | 0.000452148 |
| gene-Led11282-sp3 | 2.805171565  | 6.18E-20    |
| gene-Led11319-sp3 | 1.015954252  | 0.000120327 |
| gene-Led11377-sp3 | 0.619572084  | 0.004926146 |
| gene-Led11436-sp3 | 0.769204748  | 0.0000521   |
| gene-Led11455-sp3 | -0.973883168 | 0.003755948 |

---

**Table S5 DEG lists of LeHH24h vs LeHH3h**

| <b>gene</b>       | <b>log2FoldChange</b> | <b>pvalue</b> |
|-------------------|-----------------------|---------------|
| gene-Led00032-sp3 | -1.716464558          | 0.000106358   |
| gene-Led00043-sp3 | -0.997967164          | 0.002817814   |
| gene-Led00044-sp3 | -1.063860636          | 0.001480089   |
| gene-Led00074-sp3 | 1.355450924           | 0.003968985   |
| gene-Led00092-sp3 | 0.614969736           | 0.002869433   |
| gene-Led00095-sp3 | -1.203303645          | 7.05234E-06   |
| gene-Led00117-sp3 | 0.590025564           | 0.008381992   |
| gene-Led00122-sp3 | 1.021275877           | 0.003341465   |
| gene-Led00127-sp3 | -2.755919908          | 3.73204E-23   |
| gene-Led00129-sp3 | -0.562019629          | 0.000615504   |
| gene-Led00130-sp3 | -2.341640867          | 1.25128E-06   |
| gene-Led00165-sp3 | -0.861095482          | 5.38988E-05   |
| gene-Led00180-sp3 | -0.719376102          | 0.003023219   |
| gene-Led00196-sp3 | -0.871278247          | 0.003732149   |
| gene-Led00211-sp3 | 1.021686677           | 0.000178454   |
| gene-Led00241-sp3 | -0.491194818          | 0.004347572   |
| gene-Led00256-sp3 | 1.137215765           | 0.000350336   |
| gene-Led00287-sp3 | -1.099243708          | 6.81418E-07   |
| gene-Led00312-sp3 | 1.616370121           | 7.60418E-05   |
| gene-Led00336-sp3 | -0.775081374          | 0.001745396   |
| gene-Led00345-sp3 | 2.549400749           | 6.60188E-06   |
| gene-Led00395-sp3 | -1.255702567          | 9.64569E-05   |
| gene-Led00446-sp3 | -0.792286403          | 4.64172E-07   |
| gene-Led00452-sp3 | -0.63593129           | 0.001574232   |
| gene-Led00457-sp3 | 0.625600054           | 0.009395371   |
| gene-Led00473-sp3 | 1.014348318           | 0.004620633   |
| gene-Led00481-sp3 | -0.607752819          | 0.002793567   |
| gene-Led00484-sp3 | -0.505167619          | 0.002935841   |
| gene-Led00487-sp3 | -0.492924462          | 0.003703391   |
| gene-Led00488-sp3 | -0.634621425          | 0.000643326   |
| gene-Led00498-sp3 | 1.851583741           | 1.44195E-05   |
| gene-Led00518-sp3 | 0.804009042           | 0.001886901   |
| gene-Led00546-sp3 | -0.49095476           | 0.00842954    |
| gene-Led00547-sp3 | 0.662195798           | 0.004334512   |
| gene-Led00552-sp3 | -1.789534614          | 1.46269E-12   |
| gene-Led00553-sp3 | -0.816789836          | 0.001663816   |
| gene-Led00561-sp3 | -0.79618126           | 0.000662476   |
| gene-Led00566-sp3 | 1.003708608           | 3.90755E-05   |
| gene-Led00576-sp3 | 1.103143698           | 1.79782E-05   |
| gene-Led00588-sp3 | 2.160904831           | 1.46472E-22   |
| gene-Led00590-sp3 | 1.440001518           | 4.56987E-05   |
| gene-Led00619-sp3 | 1.134153234           | 3.59428E-07   |

|                   |              |             |
|-------------------|--------------|-------------|
| gene-Led00647-sp3 | -2.084032588 | 1.95085E-20 |
| gene-Led00649-sp3 | -0.727146548 | 0.001158677 |
| gene-Led00674-sp3 | -0.58203015  | 0.001871654 |
| gene-Led00680-sp3 | 1.703287782  | 5.01126E-16 |
| gene-Led00683-sp3 | -2.190896476 | 6.09954E-05 |
| gene-Led00709-sp3 | 3.698918697  | 2.63552E-08 |
| gene-Led00718-sp3 | -0.704514063 | 0.000782845 |
| gene-Led00727-sp3 | 0.887330869  | 0.002913291 |
| gene-Led00734-sp3 | 3.61267099   | 4.3916E-06  |
| gene-Led00741-sp3 | 2.90566424   | 2.93506E-05 |
| gene-Led00742-sp3 | 0.711313884  | 0.005254305 |
| gene-Led00754-sp3 | 1.302716041  | 2.57833E-08 |
| gene-Led00777-sp3 | 0.779114679  | 1.72424E-05 |
| gene-Led00801-sp3 | 1.368241351  | 7.67347E-06 |
| gene-Led00803-sp3 | 0.466451691  | 0.00836403  |
| gene-Led00823-sp3 | -5.882022805 | 1.97287E-05 |
| gene-Led00848-sp3 | -0.928002297 | 0.001081272 |
| gene-Led00865-sp3 | -0.594207518 | 0.000382155 |
| gene-Led00874-sp3 | -0.660337366 | 0.003999704 |
| gene-Led00883-sp3 | 1.689699223  | 8.14861E-07 |
| gene-Led00902-sp3 | -2.796710554 | 1.21378E-42 |
| gene-Led00903-sp3 | -1.52424143  | 2.63819E-11 |
| gene-Led00903-sp3 | -1.549090484 | 7.02398E-07 |
| gene-Led00904-sp3 | -3.391054925 | 3.17283E-11 |
| gene-Led00905-sp3 | -3.281519208 | 1.39479E-50 |
| gene-Led00906-sp3 | -2.014416397 | 1.77216E-20 |
| gene-Led00907-sp3 | -3.884326819 | 9.74899E-30 |
| gene-Led00907-sp3 | -2.254661949 | 7.75573E-10 |
| gene-Led00908-sp3 | -1.315011368 | 1.50856E-09 |
| gene-Led00909-sp3 | -1.424355373 | 5.25946E-07 |
| gene-Led00910-sp3 | -2.164865842 | 3.8439E-34  |
| gene-Led00911-sp3 | -1.505521708 | 0.001224366 |
| gene-Led00912-sp3 | -3.681680696 | 1.78493E-08 |
| gene-Led00918-sp3 | 2.26237869   | 2.33048E-06 |
| gene-Led00926-sp3 | 2.459129287  | 9.85121E-08 |
| gene-Led00929-sp3 | -1.431837373 | 1.76685E-05 |
| gene-Led00934-sp3 | 0.70639732   | 0.003805375 |
| gene-Led00953-sp3 | 0.883803944  | 0.002351785 |
| gene-Led00958-sp3 | 0.706045191  | 0.004404376 |
| gene-Led00964-sp3 | 0.590531868  | 0.006962922 |
| gene-Led00965-sp3 | -0.487790343 | 0.009991135 |
| gene-Led00983-sp3 | 0.978142104  | 0.005768076 |
| gene-Led01009-sp3 | 0.807690905  | 0.001792685 |
| gene-Led01037-sp3 | 1.540036982  | 0.00120251  |

|                   |              |             |
|-------------------|--------------|-------------|
| gene-Led01085-sp3 | 0.51651761   | 0.003073956 |
| gene-Led01098-sp3 | -0.909720314 | 0.00012739  |
| gene-Led01114-sp3 | 0.483696816  | 0.001337716 |
| gene-Led01116-sp3 | 1.244172639  | 9.15608E-08 |
| gene-Led01127-sp3 | -0.471713873 | 0.005867332 |
| gene-Led01128-sp3 | -0.736318619 | 5.5696E-06  |
| gene-Led01141-sp3 | -0.698763728 | 0.006844689 |
| gene-Led01142-sp3 | 0.780564648  | 0.000308583 |
| gene-Led01166-sp3 | 2.468407498  | 5.55362E-12 |
| gene-Led01172-sp3 | -0.670953136 | 0.006027351 |
| gene-Led01180-sp3 | -1.823317634 | 2.02353E-05 |
| gene-Led01180-sp3 | -1.537770875 | 4.25003E-05 |
| gene-Led01188-sp3 | 0.931882131  | 0.006057234 |
| gene-Led01196-sp3 | 1.854230563  | 1.10817E-05 |
| gene-Led01201-sp3 | -2.353524978 | 4.15209E-14 |
| gene-Led01207-sp3 | -0.56359016  | 0.002350304 |
| gene-Led01218-sp3 | -1.179773271 | 2.29747E-09 |
| gene-Led01221-sp3 | -0.697587695 | 2.71954E-05 |
| gene-Led01245-sp3 | -0.972796366 | 1.37591E-06 |
| gene-Led01248-sp3 | 1.03039838   | 0.002251794 |
| gene-Led01254-sp3 | 0.649971581  | 0.000412472 |
| gene-Led01265-sp3 | 3.204783988  | 0.000546408 |
| gene-Led01267-sp3 | -1.17118334  | 0.000589457 |
| gene-Led01274-sp3 | 0.633157351  | 0.000139593 |
| gene-Led01276-sp3 | 2.191635978  | 7.59458E-34 |
| gene-Led01279-sp3 | 0.593844269  | 0.004192933 |
| gene-Led01302-sp3 | 3.164139345  | 6.67081E-07 |
| gene-Led01305-sp3 | 0.518740707  | 0.006905094 |
| gene-Led01312-sp3 | 1.509506085  | 1.48109E-06 |
| gene-Led01325-sp3 | -4.838011107 | 1.23629E-65 |
| gene-Led01330-sp3 | -0.634112334 | 0.001278767 |
| gene-Led01338-sp3 | -1.073241965 | 1.02299E-07 |
| gene-Led01347-sp3 | 2.485376335  | 9.36212E-14 |
| gene-Led01354-sp3 | 0.991549154  | 0.006869015 |
| gene-Led01359-sp3 | 2.409658554  | 5.24921E-11 |
| gene-Led01379-sp3 | 1.220963231  | 0.000122668 |
| gene-Led01383-sp3 | -0.514830457 | 0.006369405 |
| gene-Led01400-sp3 | 0.464559546  | 0.009198308 |
| gene-Led01407-sp3 | -1.400482993 | 0.000102593 |
| gene-Led01431-sp3 | 1.090871164  | 9.87619E-05 |
| gene-Led01439-sp3 | 1.058092316  | 0.002066928 |
| gene-Led01443-sp3 | -1.175464654 | 0.001218148 |
| gene-Led01458-sp3 | 1.599987621  | 8.15737E-09 |
| gene-Led01472-sp3 | 1.230094078  | 2.42569E-07 |

|                   |              |             |
|-------------------|--------------|-------------|
| gene-Led01474-sp3 | 0.919721509  | 0.003002733 |
| gene-Led01483-sp3 | -2.056082174 | 0.00037901  |
| gene-Led01492-sp3 | -1.367764623 | 3.07299E-05 |
| gene-Led01498-sp3 | 1.148761356  | 5.77318E-06 |
| gene-Led01536-sp3 | -2.252985311 | 2.92875E-26 |
| gene-Led01537-sp3 | 2.283737485  | 2.6864E-05  |
| gene-Led01538-sp3 | 4.927701713  | 1.3464E-79  |
| gene-Led01539-sp3 | 1.940358964  | 4.11021E-12 |
| gene-Led01543-sp3 | -0.547421475 | 0.006030843 |
| gene-Led01550-sp3 | 1.274132734  | 5.1584E-07  |
| gene-Led01557-sp3 | 3.73181655   | 1.97225E-05 |
| gene-Led01557-sp3 | 3.766812803  | 0.000243581 |
| gene-Led01567-sp3 | 2.734298119  | 3.76071E-24 |
| gene-Led01568-sp3 | 0.774271973  | 4.983E-05   |
| gene-Led01571-sp3 | -0.914248844 | 0.006783755 |
| gene-Led01573-sp3 | -0.640124547 | 2.09911E-05 |
| gene-Led01578-sp3 | -2.272079296 | 5.61155E-12 |
| gene-Led01608-sp3 | -0.66222948  | 2.63012E-05 |
| gene-Led01619-sp3 | -0.743374806 | 0.000117117 |
| gene-Led01630-sp3 | 3.182377301  | 4.2688E-43  |
| gene-Led01634-sp3 | -1.283728534 | 1.25304E-06 |
| gene-Led01659-sp3 | -1.983142425 | 8.99297E-06 |
| gene-Led01665-sp3 | -0.678227348 | 4.72488E-05 |
| gene-Led01667-sp3 | -0.757938068 | 0.000634751 |
| gene-Led01670-sp3 | 0.612032317  | 0.001444125 |
| gene-Led01673-sp3 | -1.378098853 | 5.22302E-08 |
| gene-Led01693-sp3 | 1.617623474  | 0.001370396 |
| gene-Led01718-sp3 | -2.40729298  | 2.94644E-17 |
| gene-Led01721-sp3 | -0.569288784 | 0.000169453 |
| gene-Led01763-sp3 | 1.958037565  | 1.79148E-06 |
| gene-Led01764-sp3 | 4.802537618  | 2.90531E-56 |
| gene-Led01765-sp3 | 6.387544245  | 2.21301E-40 |
| gene-Led01766-sp3 | 0.924927112  | 0.00777099  |
| gene-Led01767-sp3 | 1.099234336  | 6.31365E-07 |
| gene-Led01769-sp3 | -0.508130908 | 0.008433023 |
| gene-Led01793-sp3 | 0.770370408  | 0.005856614 |
| gene-Led01797-sp3 | 1.085544063  | 2.61794E-06 |
| gene-Led01806-sp3 | 1.463950531  | 4.89525E-08 |
| gene-Led01832-sp3 | 0.898881852  | 0.000894154 |
| gene-Led01859-sp3 | 2.573581942  | 7.06207E-11 |
| gene-Led01902-sp3 | -0.663025209 | 0.000342826 |
| gene-Led01916-sp3 | -1.069130228 | 5.16304E-09 |
| gene-Led01926-sp3 | -0.645943521 | 0.000951947 |
| gene-Led01935-sp3 | -0.783968614 | 7.31694E-05 |



|                   |              |             |
|-------------------|--------------|-------------|
| gene-Led01940-sp3 | 0.809076141  | 0.000225404 |
| gene-Led01960-sp3 | -0.78992715  | 5.00298E-05 |
| gene-Led01973-sp3 | 0.878789305  | 0.00378887  |
| gene-Led01978-sp3 | -3.548779333 | 1.27813E-06 |
| gene-Led02016-sp3 | 2.119305397  | 4.09072E-15 |
| gene-Led02021-sp3 | 1.862868093  | 4.15891E-05 |
| gene-Led02047-sp3 | -0.800360735 | 2.3235E-05  |
| gene-Led02054-sp3 | 0.960974216  | 0.001799291 |
| gene-Led02063-sp3 | 0.615984437  | 0.002229426 |
| gene-Led02111-sp3 | 1.578178926  | 8.957E-09   |
| gene-Led02118-sp3 | -0.40715274  | 0.006010087 |
| gene-Led02123-sp3 | -0.699978223 | 0.000172722 |
| gene-Led02127-sp3 | -0.550614571 | 0.001428114 |
| gene-Led02135-sp3 | -0.865364397 | 0.000516078 |
| gene-Led02157-sp3 | 0.679613812  | 0.001340323 |
| gene-Led02158-sp3 | -0.439376012 | 0.004463994 |
| gene-Led02190-sp3 | 0.856717437  | 0.000141953 |
| gene-Led02200-sp3 | 1.524798475  | 3.15664E-06 |
| gene-Led02223-sp3 | -0.469282635 | 0.004586789 |
| gene-Led02238-sp3 | -0.919668467 | 7.21461E-06 |
| gene-Led02241-sp3 | 1.599102495  | 1.79816E-05 |
| gene-Led02251-sp3 | 2.090772018  | 1.49269E-05 |
| gene-Led02252-sp3 | 1.112252542  | 0.002689528 |
| gene-Led02273-sp3 | 1.420644464  | 3.65732E-12 |
| gene-Led02291-sp3 | 1.781949574  | 0.000387949 |
| gene-Led02325-sp3 | 0.82736047   | 2.3485E-05  |
| gene-Led02354-sp3 | -0.914448025 | 7.6949E-06  |
| gene-Led02368-sp3 | 0.894266244  | 0.000141548 |
| gene-Led02376-sp3 | -0.817668789 | 0.007984495 |
| gene-Led02377-sp3 | -1.402157175 | 7.56242E-05 |
| gene-Led02381-sp3 | 0.66105974   | 0.008425202 |
| gene-Led02397-sp3 | 0.967329532  | 0.001169744 |
| gene-Led02399-sp3 | 0.953133945  | 0.001485845 |
| gene-Led02415-sp3 | -0.522004111 | 0.009454702 |
| gene-Led02417-sp3 | 0.702032739  | 2.2974E-05  |
| gene-Led02440-sp3 | -1.994144095 | 1.83516E-07 |
| gene-Led02453-sp3 | 0.884010965  | 0.005582535 |
| gene-Led02458-sp3 | -0.811904174 | 0.006804898 |
| gene-Led02459-sp3 | -0.735152472 | 0.003467173 |
| gene-Led02461-sp3 | 1.050955636  | 0.003754669 |
| gene-Led02494-sp3 | 4.175194663  | 1.08153E-09 |
| gene-Led02500-sp3 | 4.237267902  | 1.09335E-06 |
| gene-Led02501-sp3 | 1.205946374  | 1.91092E-09 |
| gene-Led02516-sp3 | -1.166565536 | 0.001704395 |

|                   |              |             |
|-------------------|--------------|-------------|
| gene-Led02558-sp3 | -0.923126637 | 0.002417277 |
| gene-Led02609-sp3 | -0.465729684 | 0.00906399  |
| gene-Led02620-sp3 | 1.591019107  | 0.001776882 |
| gene-Led02639-sp3 | -0.6777906   | 7.74449E-05 |
| gene-Led02666-sp3 | 0.619570322  | 0.001349945 |
| gene-Led02679-sp3 | 1.090634709  | 0.00611846  |
| gene-Led02690-sp3 | -0.710287702 | 0.006413959 |
| gene-Led02699-sp3 | 1.531122571  | 0.005375417 |
| gene-Led02726-sp3 | 1.15907342   | 8.15542E-06 |
| gene-Led02736-sp3 | 3.021300088  | 9.50476E-29 |
| gene-Led02745-sp3 | 1.208090889  | 0.000885465 |
| gene-Led02746-sp3 | 0.866186488  | 3.65449E-05 |
| gene-Led02747-sp3 | 0.731792607  | 0.009176666 |
| gene-Led02755-sp3 | -1.299859247 | 8.52363E-10 |
| gene-Led02757-sp3 | 2.19363868   | 4.12426E-11 |
| gene-Led02758-sp3 | 0.628649593  | 0.001928109 |
| gene-Led02776-sp3 | 0.908142288  | 3.61478E-06 |
| gene-Led02777-sp3 | -0.73376305  | 5.45666E-06 |
| gene-Led02804-sp3 | -0.530194268 | 0.000355711 |
| gene-Led02852-sp3 | -0.563789851 | 0.000567735 |
| gene-Led02859-sp3 | -0.812310695 | 4.78948E-07 |
| gene-Led02886-sp3 | -0.514288457 | 0.009274644 |
| gene-Led02900-sp3 | 0.66293503   | 0.000358052 |
| gene-Led02903-sp3 | 0.582008791  | 0.004908491 |
| gene-Led02910-sp3 | -1.717741391 | 3.45811E-10 |
| gene-Led02964-sp3 | -1.28375191  | 0.002510229 |
| gene-Led03018-sp3 | 1.25687249   | 2.60873E-10 |
| gene-Led03045-sp3 | 1.391380775  | 0.00179193  |
| gene-Led03054-sp3 | -0.792729551 | 5.78348E-07 |
| gene-Led03066-sp3 | 0.706022391  | 3.21781E-05 |
| gene-Led03067-sp3 | -0.646458638 | 0.005079285 |
| gene-Led03075-sp3 | 0.611307125  | 0.004217108 |
| gene-Led03155-sp3 | -0.691920633 | 0.00978313  |
| gene-Led03165-sp3 | 0.592364542  | 0.007454435 |
| gene-Led03168-sp3 | 1.299775966  | 1.40292E-08 |
| gene-Led03171-sp3 | 1.002912232  | 0.000885286 |
| gene-Led03172-sp3 | -2.167534313 | 8.97276E-05 |
| gene-Led03176-sp3 | -0.704137486 | 0.001561511 |
| gene-Led03200-sp3 | 1.795190258  | 4.19832E-07 |
| gene-Led03201-sp3 | 2.821452631  | 1.46998E-08 |
| gene-Led03203-sp3 | -1.141980323 | 1.5725E-07  |
| gene-Led03207-sp3 | -0.978196547 | 1.40324E-06 |
| gene-Led03223-sp3 | -0.628497475 | 0.007192412 |
| gene-Led03224-sp3 | 1.221958954  | 2.84628E-05 |

|                   |              |             |
|-------------------|--------------|-------------|
| gene-Led03229-sp3 | 1.211328004  | 0.001700279 |
| gene-Led03234-sp3 | 0.544361247  | 0.006653595 |
| gene-Led03235-sp3 | 1.180884443  | 0.002918272 |
| gene-Led03250-sp3 | 2.145315055  | 2.71806E-10 |
| gene-Led03266-sp3 | -0.721675263 | 0.001337908 |
| gene-Led03270-sp3 | 1.104980404  | 0.001463176 |
| gene-Led03273-sp3 | 1.971038422  | 0.000841579 |
| gene-Led03287-sp3 | 2.782986473  | 4.89823E-22 |
| gene-Led03290-sp3 | -0.559442648 | 0.000100407 |
| gene-Led03291-sp3 | 0.586237523  | 0.003565417 |
| gene-Led03298-sp3 | 1.010103727  | 6.27998E-05 |
| gene-Led03302-sp3 | 0.922888577  | 1.05811E-05 |
| gene-Led03303-sp3 | 1.596020043  | 3.07704E-08 |
| gene-Led03323-sp3 | 0.731032294  | 0.000195576 |
| gene-Led03332-sp3 | -0.837001621 | 0.001552338 |
| gene-Led03426-sp3 | 1.291341255  | 2.42958E-07 |
| gene-Led03433-sp3 | 0.753668288  | 2.13815E-05 |
| gene-Led03434-sp3 | 3.868504161  | 2.46465E-27 |
| gene-Led03441-sp3 | 1.196240801  | 1.83627E-05 |
| gene-Led03446-sp3 | -0.670119967 | 4.8124E-05  |
| gene-Led03469-sp3 | 1.26096065   | 0.000877593 |
| gene-Led03474-sp3 | 0.639118613  | 0.006026058 |
| gene-Led03483-sp3 | -0.7003502   | 0.005850075 |
| gene-Led03484-sp3 | 2.123732995  | 4.61766E-08 |
| gene-Led03486-sp3 | 1.424445964  | 2.20964E-06 |
| gene-Led03487-sp3 | 1.96742038   | 0.000172264 |
| gene-Led03490-sp3 | -0.941441362 | 4.18753E-06 |
| gene-Led03534-sp3 | -1.061724815 | 0.004219259 |
| gene-Led03547-sp3 | 1.594562748  | 0.000714473 |
| gene-Led03557-sp3 | -1.41883355  | 1.23073E-05 |
| gene-Led03564-sp3 | 0.858035633  | 0.001346317 |
| gene-Led03570-sp3 | -1.586807249 | 8.56116E-08 |
| gene-Led03576-sp3 | 2.479066814  | 2.52675E-19 |
| gene-Led03580-sp3 | -0.439255786 | 0.009448821 |
| gene-Led03623-sp3 | 1.728762434  | 2.36328E-08 |
| gene-Led03628-sp3 | 1.025859297  | 6.25008E-05 |
| gene-Led03634-sp3 | -0.39378679  | 0.006946101 |
| gene-Led03665-sp3 | 1.392562463  | 0.000239657 |
| gene-Led03668-sp3 | 1.591694469  | 0.000495327 |
| gene-Led03676-sp3 | 2.346930645  | 0.002881162 |
| gene-Led03682-sp3 | -1.479943616 | 8.90829E-08 |
| gene-Led03702-sp3 | 2.01521207   | 3.19616E-28 |
| gene-Led03708-sp3 | 1.561254213  | 0.001627154 |
| gene-Led03712-sp3 | 1.014045204  | 2.29436E-06 |

|                   |              |             |
|-------------------|--------------|-------------|
| gene-Led03736-sp3 | 2.476119415  | 1.57482E-12 |
| gene-Led03743-sp3 | -1.064585217 | 0.000194462 |
| gene-Led03748-sp3 | 2.773985078  | 1.96697E-05 |
| gene-Led03760-sp3 | -1.794758635 | 0.002458813 |
| gene-Led03786-sp3 | -1.31155262  | 0.000633193 |
| gene-Led03789-sp3 | -1.519045667 | 0.000823152 |
| gene-Led03810-sp3 | -1.085350388 | 0.001483443 |
| gene-Led03838-sp3 | 2.857665281  | 0.001065659 |
| gene-Led03839-sp3 | 2.081781982  | 2.942E-06   |
| gene-Led03840-sp3 | 1.13415171   | 0.001168243 |
| gene-Led03841-sp3 | -0.990961237 | 1.99178E-05 |
| gene-Led03850-sp3 | -0.592835119 | 0.000987123 |
| gene-Led03859-sp3 | 0.575533401  | 0.008731128 |
| gene-Led03886-sp3 | 1.636107868  | 1.71161E-13 |
| gene-Led03887-sp3 | 2.293763623  | 4.4965E-34  |
| gene-Led03888-sp3 | 1.908210761  | 1.75233E-20 |
| gene-Led03896-sp3 | 3.074104187  | 6.90711E-25 |
| gene-Led03898-sp3 | 0.503135354  | 0.002700546 |
| gene-Led03899-sp3 | 0.589030515  | 0.007038794 |
| gene-Led03907-sp3 | 3.143083968  | 6.42467E-17 |
| gene-Led03908-sp3 | 3.593250168  | 8.19892E-06 |
| gene-Led03922-sp3 | 1.738477084  | 2.77953E-05 |
| gene-Led03932-sp3 | -1.937257998 | 3.44707E-10 |
| gene-Led03934-sp3 | 0.772282989  | 3.76646E-05 |
| gene-Led03965-sp3 | 3.294730111  | 1.4781E-06  |
| gene-Led03978-sp3 | -0.620688853 | 0.000470533 |
| gene-Led03985-sp3 | -0.795154106 | 3.58692E-08 |
| gene-Led04043-sp3 | 1.208218915  | 0.00980994  |
| gene-Led04044-sp3 | 1.022377979  | 0.001732453 |
| gene-Led04058-sp3 | 1.192388399  | 1.07498E-05 |
| gene-Led04109-sp3 | -0.615123059 | 0.00261478  |
| gene-Led04110-sp3 | 1.606007403  | 0.004621768 |
| gene-Led04114-sp3 | 1.068247913  | 0.002095556 |
| gene-Led04117-sp3 | 1.780051034  | 0.000956165 |
| gene-Led04121-sp3 | -1.161088103 | 2.44827E-08 |
| gene-Led04128-sp3 | 1.676244747  | 6.20489E-10 |
| gene-Led04131-sp3 | -1.299963768 | 0.001879511 |
| gene-Led04147-sp3 | 1.786975878  | 8.01648E-07 |
| gene-Led04157-sp3 | 2.609414814  | 1.63261E-10 |
| gene-Led04171-sp3 | -0.69412909  | 0.006156171 |
| gene-Led04193-sp3 | 0.795109113  | 0.002063982 |
| gene-Led04203-sp3 | 0.84569092   | 2.02613E-05 |
| gene-Led04228-sp3 | 1.503555689  | 3.19396E-06 |
| gene-Led04261-sp3 | -1.059953932 | 0.000417437 |

|                   |              |             |
|-------------------|--------------|-------------|
| gene-Led04270-sp3 | 1.58153208   | 0.000688079 |
| gene-Led04270-sp3 | 1.452916343  | 0.002376406 |
| gene-Led04279-sp3 | -1.67197371  | 3.25779E-09 |
| gene-Led04282-sp3 | 2.202068833  | 6.24407E-09 |
| gene-Led04290-sp3 | 1.675330939  | 0.002607013 |
| gene-Led04295-sp3 | 0.580297482  | 0.009542693 |
| gene-Led04303-sp3 | -1.430079032 | 3.55528E-17 |
| gene-Led04313-sp3 | -0.588995897 | 0.001868755 |
| gene-Led04336-sp3 | -2.114661161 | 2.92287E-05 |
| gene-Led04345-sp3 | -2.004682162 | 0.00074514  |
| gene-Led04358-sp3 | -0.911072451 | 0.00204359  |
| gene-Led04372-sp3 | -0.546138369 | 0.000478732 |
| gene-Led04391-sp3 | 1.124616251  | 9.86048E-07 |
| gene-Led04402-sp3 | 0.756513154  | 3.72168E-05 |
| gene-Led04417-sp3 | 0.53390111   | 0.007496995 |
| gene-Led04429-sp3 | -0.747820891 | 8.34433E-05 |
| gene-Led04463-sp3 | 0.682737791  | 0.003264788 |
| gene-Led04471-sp3 | -0.586088672 | 0.000619325 |
| gene-Led04492-sp3 | -0.645658064 | 0.000672636 |
| gene-Led04494-sp3 | 0.678958117  | 0.009006729 |
| gene-Led04499-sp3 | 3.669429485  | 8.71098E-56 |
| gene-Led04512-sp3 | 1.341415046  | 0.000211035 |
| gene-Led04519-sp3 | -1.090643139 | 0.00022038  |
| gene-Led04540-sp3 | -0.521976999 | 0.007008425 |
| gene-Led04554-sp3 | -0.466252087 | 0.0088078   |
| gene-Led04558-sp3 | 1.239788429  | 7.07356E-06 |
| gene-Led04562-sp3 | -1.362418901 | 2.96913E-06 |
| gene-Led04568-sp3 | -1.682761302 | 2.43052E-08 |
| gene-Led04604-sp3 | 2.124390033  | 1.35718E-05 |
| gene-Led04617-sp3 | -1.262065544 | 0.001148926 |
| gene-Led04641-sp3 | 1.379290444  | 0.001514288 |
| gene-Led04642-sp3 | -1.195684845 | 4.75971E-06 |
| gene-Led04658-sp3 | -0.620564581 | 0.009244895 |
| gene-Led04663-sp3 | 1.902707443  | 2.50381E-10 |
| gene-Led04681-sp3 | 1.324313555  | 0.001385679 |
| gene-Led04683-sp3 | -4.325295599 | 9.79153E-11 |
| gene-Led04692-sp3 | 0.72471198   | 0.009065365 |
| gene-Led04763-sp3 | 1.863808007  | 3.72508E-12 |
| gene-Led04771-sp3 | 1.459337646  | 1.9738E-06  |
| gene-Led04796-sp3 | -0.916478465 | 0.007867079 |
| gene-Led04806-sp3 | -1.312706479 | 0.001208405 |
| gene-Led04816-sp3 | -1.27903459  | 2.28526E-05 |
| gene-Led04817-sp3 | -0.753792601 | 1.73536E-05 |
| gene-Led04817-sp3 | -0.824831063 | 9.74753E-05 |

|                   |              |             |
|-------------------|--------------|-------------|
| gene-Led04838-sp3 | 1.372229883  | 0.00424542  |
| gene-Led04942-sp3 | -1.213417618 | 1.28077E-07 |
| gene-Led04945-sp3 | -1.745918356 | 1.66877E-25 |
| gene-Led04946-sp3 | -1.306851322 | 9.86821E-05 |
| gene-Led04949-sp3 | -0.410683016 | 0.007870615 |
| gene-Led04950-sp3 | -0.626772705 | 0.000316837 |
| gene-Led04955-sp3 | 1.079399458  | 2.74017E-07 |
| gene-Led04958-sp3 | 3.031789407  | 2.32853E-40 |
| gene-Led04959-sp3 | 1.296993886  | 0.001327923 |
| gene-Led04960-sp3 | 1.628050899  | 1.25746E-07 |
| gene-Led04968-sp3 | 2.373360675  | 0.001613967 |
| gene-Led04985-sp3 | 1.148743566  | 0.002090802 |
| gene-Led04987-sp3 | -0.64046532  | 0.004924704 |
| gene-Led05009-sp3 | 0.724194857  | 0.004213292 |
| gene-Led05017-sp3 | 2.950336962  | 6.463E-13   |
| gene-Led05022-sp3 | -2.943187723 | 3.75977E-10 |
| gene-Led05031-sp3 | -2.855136426 | 5.07846E-30 |
| gene-Led05034-sp3 | -1.803055188 | 2.05626E-20 |
| gene-Led05039-sp3 | -1.430200759 | 0.000151647 |
| gene-Led05048-sp3 | 0.75611068   | 0.005727769 |
| gene-Led05049-sp3 | 0.93435746   | 0.000498929 |
| gene-Led05056-sp3 | 0.715191655  | 0.005711481 |
| gene-Led05062-sp3 | -2.885390397 | 2.87437E-15 |
| gene-Led05063-sp3 | -3.525810556 | 1.33611E-21 |
| gene-Led05068-sp3 | 4.499562308  | 1.09418E-25 |
| gene-Led05087-sp3 | 2.142987266  | 2.91176E-05 |
| gene-Led05094-sp3 | 0.932724376  | 0.001218345 |
| gene-Led05095-sp3 | -0.86013312  | 0.00030357  |
| gene-Led05099-sp3 | 0.577712022  | 0.005196166 |
| gene-Led05105-sp3 | -1.378450294 | 4.70067E-05 |
| gene-Led05123-sp3 | 3.250692696  | 6.60102E-13 |
| gene-Led05126-sp3 | -1.546314488 | 0.000395297 |
| gene-Led05130-sp3 | -1.827859596 | 8.6726E-13  |
| gene-Led05132-sp3 | -0.762421694 | 0.004680298 |
| gene-Led05133-sp3 | -5.161890613 | 6.70132E-20 |
| gene-Led05139-sp3 | 1.415275042  | 0.000860249 |
| gene-Led05144-sp3 | 0.749552065  | 4.5904E-06  |
| gene-Led05145-sp3 | 0.862812905  | 0.000244913 |
| gene-Led05164-sp3 | 0.899648528  | 0.007463948 |
| gene-Led05169-sp3 | 1.745175311  | 4.12216E-05 |
| gene-Led05176-sp3 | 1.556162454  | 0.000397417 |
| gene-Led05203-sp3 | -0.92065833  | 2.91251E-07 |
| gene-Led05207-sp3 | -2.516985683 | 2.35294E-08 |
| gene-Led05219-sp3 | 1.04949866   | 5.31731E-05 |

|                   |              |             |
|-------------------|--------------|-------------|
| gene-Led05230-sp3 | -0.52567749  | 0.001827475 |
| gene-Led05235-sp3 | 0.713607463  | 0.005309818 |
| gene-Led05285-sp3 | 1.557139955  | 0.000147761 |
| gene-Led05296-sp3 | -0.563205093 | 0.002107108 |
| gene-Led05329-sp3 | -0.509691064 | 0.005865355 |
| gene-Led05332-sp3 | 1.742726427  | 9.07258E-11 |
| gene-Led05340-sp3 | 1.079224433  | 2.19643E-08 |
| gene-Led05353-sp3 | -0.578421093 | 0.005292729 |
| gene-Led05408-sp3 | -0.42216822  | 0.009987205 |
| gene-Led05458-sp3 | 0.70313638   | 0.00013554  |
| gene-Led05491-sp3 | -0.482883965 | 0.008710342 |
| gene-Led05492-sp3 | 1.561007258  | 0.000613994 |
| gene-Led05570-sp3 | 4.238525651  | 2.97191E-15 |
| gene-Led05578-sp3 | 0.935725982  | 0.003366719 |
| gene-Led05591-sp3 | 0.623306665  | 0.002205107 |
| gene-Led05597-sp3 | -0.465682301 | 0.007805265 |
| gene-Led05631-sp3 | 1.051439402  | 0.001952282 |
| gene-Led05658-sp3 | -1.384132235 | 9.81366E-09 |
| gene-Led05693-sp3 | -1.49720992  | 3.01713E-09 |
| gene-Led05698-sp3 | -1.553429269 | 0.000565712 |
| gene-Led05717-sp3 | 1.065587929  | 0.006813444 |
| gene-Led05722-sp3 | 0.640705029  | 0.000858815 |
| gene-Led05728-sp3 | 1.624213336  | 6.75134E-12 |
| gene-Led05740-sp3 | -0.98603305  | 7.94012E-05 |
| gene-Led05743-sp3 | 1.347148181  | 3.83841E-05 |
| gene-Led05768-sp3 | -0.709583148 | 4.05281E-05 |
| gene-Led05770-sp3 | -0.865263325 | 0.001923155 |
| gene-Led05777-sp3 | -0.671265301 | 0.005586015 |
| gene-Led05808-sp3 | -1.420053386 | 1.61579E-11 |
| gene-Led05862-sp3 | -0.860284613 | 4.14778E-05 |
| gene-Led05864-sp3 | 0.549836902  | 0.000117229 |
| gene-Led05881-sp3 | 0.688363627  | 0.002581994 |
| gene-Led05883-sp3 | -0.676895387 | 0.001325675 |
| gene-Led05902-sp3 | 1.549923517  | 1.00535E-05 |
| gene-Led05919-sp3 | 0.679337075  | 0.006687292 |
| gene-Led05934-sp3 | 1.60709047   | 1.55752E-07 |
| gene-Led05959-sp3 | 0.884335344  | 0.000314868 |
| gene-Led05983-sp3 | 2.324911101  | 0.003188244 |
| gene-Led05984-sp3 | 2.160019276  | 0.004428618 |
| gene-Led05986-sp3 | 1.829800841  | 4.13535E-10 |
| gene-Led06007-sp3 | 1.08814987   | 0.001086051 |
| gene-Led06015-sp3 | 1.884871003  | 0.002481055 |
| gene-Led06017-sp3 | 1.363726545  | 9.94578E-06 |
| gene-Led06031-sp3 | -0.83837205  | 0.00010268  |

|                   |              |             |
|-------------------|--------------|-------------|
| gene-Led06051-sp3 | 0.676593315  | 0.003522003 |
| gene-Led06055-sp3 | 1.4954956    | 4.04442E-06 |
| gene-Led06056-sp3 | -0.527422035 | 0.001413773 |
| gene-Led06059-sp3 | -2.09576403  | 6.69241E-19 |
| gene-Led06060-sp3 | -0.873297476 | 1.41765E-06 |
| gene-Led06075-sp3 | 2.130236797  | 3.94833E-06 |
| gene-Led06118-sp3 | 0.958741336  | 0.000586837 |
| gene-Led06124-sp3 | -1.126209467 | 7.1833E-08  |
| gene-Led06138-sp3 | -0.779580482 | 4.52911E-06 |
| gene-Led06162-sp3 | -3.884078346 | 1.68594E-09 |
| gene-Led06164-sp3 | -1.390272543 | 1.43213E-06 |
| gene-Led06165-sp3 | 1.301296983  | 1.23629E-10 |
| gene-Led06217-sp3 | 2.343191615  | 0.000391944 |
| gene-Led06227-sp3 | 1.296577132  | 0.000517786 |
| gene-Led06250-sp3 | 0.730966641  | 0.004563433 |
| gene-Led06253-sp3 | 1.119225455  | 4.36127E-05 |
| gene-Led06255-sp3 | 1.939896605  | 3.1833E-05  |
| gene-Led06265-sp3 | -1.93050662  | 1.86641E-10 |
| gene-Led06278-sp3 | -0.590263378 | 0.004462997 |
| gene-Led06279-sp3 | -1.368164676 | 1.24685E-06 |
| gene-Led06328-sp3 | -0.578333821 | 0.004365174 |
| gene-Led06338-sp3 | 2.458558883  | 3.5085E-33  |
| gene-Led06347-sp3 | 2.50175445   | 5.35954E-25 |
| gene-Led06349-sp3 | 0.860690794  | 0.007684596 |
| gene-Led06367-sp3 | -3.427848514 | 4.24632E-08 |
| gene-Led06391-sp3 | -5.4110145   | 9.50668E-60 |
| gene-Led06391-sp3 | -2.773971812 | 0.003202027 |
| gene-Led06410-sp3 | -0.518074913 | 0.009364206 |
| gene-Led06460-sp3 | -0.699072833 | 0.000619923 |
| gene-Led06464-sp3 | 0.826968641  | 0.001228376 |
| gene-Led06483-sp3 | -1.300604475 | 3.59864E-11 |
| gene-Led06499-sp3 | 1.387230031  | 0.000763977 |
| gene-Led06514-sp3 | -0.859634784 | 0.003347881 |
| gene-Led06524-sp3 | 2.093934954  | 1.92355E-20 |
| gene-Led06530-sp3 | 3.184755362  | 1.28387E-16 |
| gene-Led06540-sp3 | -0.504663912 | 0.007829486 |
| gene-Led06546-sp3 | 5.66082246   | 5.92273E-62 |
| gene-Led06565-sp3 | -0.793543837 | 0.001474509 |
| gene-Led06582-sp3 | -1.208514783 | 4.83107E-08 |
| gene-Led06598-sp3 | 0.934646167  | 1.54019E-05 |
| gene-Led06601-sp3 | -0.973782247 | 1.07229E-07 |
| gene-Led06603-sp3 | -1.408884877 | 7.52282E-07 |
| gene-Led06604-sp3 | -0.710461305 | 0.000175705 |
| gene-Led06642-sp3 | 2.255455441  | 1.46547E-09 |



|                   |              |             |
|-------------------|--------------|-------------|
| gene-Led06668-sp3 | 1.375959839  | 0.001492787 |
| gene-Led06732-sp3 | 2.453963877  | 4.98775E-05 |
| gene-Led06772-sp3 | 2.106624742  | 9.02134E-09 |
| gene-Led06782-sp3 | 1.646457309  | 1.4345E-06  |
| gene-Led06801-sp3 | 1.539537839  | 0.002217044 |
| gene-Led06808-sp3 | 0.997709332  | 9.43791E-06 |
| gene-Led06827-sp3 | 2.559156392  | 1.25628E-05 |
| gene-Led06842-sp3 | 0.657646009  | 0.001954149 |
| gene-Led06846-sp3 | 0.57523407   | 0.007829274 |
| gene-Led06848-sp3 | 3.418438205  | 4.45433E-10 |
| gene-Led06850-sp3 | 4.571199774  | 7.67491E-14 |
| gene-Led06888-sp3 | 5.55941702   | 1.42335E-56 |
| gene-Led06929-sp3 | -0.583583234 | 0.002106102 |
| gene-Led06931-sp3 | 1.17852883   | 4.75323E-05 |
| gene-Led06933-sp3 | 0.736916703  | 0.005963003 |
| gene-Led06946-sp3 | -0.761855275 | 0.001067992 |
| gene-Led06949-sp3 | 0.592765063  | 0.000389139 |
| gene-Led06957-sp3 | 2.397203379  | 2.06242E-27 |
| gene-Led06993-sp3 | 0.928112371  | 0.007808909 |
| gene-Led06998-sp3 | -1.013877176 | 0.000120086 |
| gene-Led07002-sp3 | -1.009840129 | 1.05788E-05 |
| gene-Led07019-sp3 | 1.295783771  | 1.9422E-11  |
| gene-Led07029-sp3 | 1.326594347  | 0.005021919 |
| gene-Led07041-sp3 | -1.322230313 | 3.24176E-06 |
| gene-Led07043-sp3 | 2.581264153  | 1.36438E-07 |
| gene-Led07089-sp3 | 0.611796009  | 0.003205154 |
| gene-Led07092-sp3 | 2.083222583  | 3.14066E-07 |
| gene-Led07102-sp3 | -1.433297668 | 1.0352E-06  |
| gene-Led07104-sp3 | -0.624837613 | 0.001414951 |
| gene-Led07136-sp3 | -1.244025508 | 0.0003523   |
| gene-Led07148-sp3 | 0.943045706  | 0.001920019 |
| gene-Led07155-sp3 | -0.751270639 | 0.003927893 |
| gene-Led07180-sp3 | 2.447381288  | 6.16018E-11 |
| gene-Led07186-sp3 | -1.568180189 | 6.11193E-16 |
| gene-Led07202-sp3 | -0.728077798 | 0.000538942 |
| gene-Led07204-sp3 | 2.653221631  | 7.56216E-14 |
| gene-Led07205-sp3 | 0.9276758    | 0.002488934 |
| gene-Led07224-sp3 | 0.934445964  | 6.88787E-05 |
| gene-Led07227-sp3 | 1.260528969  | 7.31379E-08 |
| gene-Led07275-sp3 | 1.104004957  | 3.26055E-11 |
| gene-Led07300-sp3 | 1.245174901  | 2.5515E-09  |
| gene-Led07305-sp3 | -0.641378839 | 0.003575682 |
| gene-Led07321-sp3 | -0.444554893 | 0.00363381  |
| gene-Led07345-sp3 | 3.494695777  | 6.91622E-28 |

|                   |              |             |
|-------------------|--------------|-------------|
| gene-Led07360-sp3 | 2.865840681  | 2.85841E-06 |
| gene-Led07388-sp3 | 0.580971583  | 0.008448087 |
| gene-Led07397-sp3 | 0.898921753  | 0.000227921 |
| gene-Led07404-sp3 | -2.214432501 | 1.80613E-07 |
| gene-Led07486-sp3 | -0.463072484 | 0.003832229 |
| gene-Led07492-sp3 | -0.54062742  | 0.006356027 |
| gene-Led07495-sp3 | -0.46867398  | 0.004371104 |
| gene-Led07503-sp3 | -0.744529889 | 0.000350212 |
| gene-Led07517-sp3 | -1.25158811  | 5.40567E-10 |
| gene-Led07525-sp3 | -1.482492758 | 8.87906E-15 |
| gene-Led07526-sp3 | 1.634423892  | 6.27418E-05 |
| gene-Led07526-sp3 | 1.199734664  | 0.003063471 |
| gene-Led07592-sp3 | 3.492240754  | 6.31336E-37 |
| gene-Led07595-sp3 | -3.976576827 | 2.08726E-61 |
| gene-Led07601-sp3 | -0.684180934 | 0.000869983 |
| gene-Led07604-sp3 | -0.736665346 | 3.12483E-05 |
| gene-Led07615-sp3 | 1.289349096  | 0.002113651 |
| gene-Led07626-sp3 | 1.867452853  | 3.80867E-15 |
| gene-Led07629-sp3 | 0.821580654  | 0.000269422 |
| gene-Led07637-sp3 | 0.562987597  | 0.001963062 |
| gene-Led07646-sp3 | -0.579320972 | 0.001172493 |
| gene-Led07647-sp3 | -0.542997806 | 0.007718723 |
| gene-Led07684-sp3 | -0.603745369 | 0.000221933 |
| gene-Led07685-sp3 | -1.415418143 | 1.87318E-07 |
| gene-Led07697-sp3 | 3.574130319  | 4.65955E-11 |
| gene-Led07738-sp3 | 0.94917231   | 1.13221E-06 |
| gene-Led07742-sp3 | 1.392097242  | 0.000626575 |
| gene-Led07744-sp3 | -1.648513841 | 0.000626582 |
| gene-Led07758-sp3 | 2.408498708  | 2.92744E-05 |
| gene-Led07788-sp3 | 0.940453751  | 4.06604E-06 |
| gene-Led07803-sp3 | 1.571115275  | 1.38415E-06 |
| gene-Led07810-sp3 | -0.696494917 | 0.000350841 |
| gene-Led07827-sp3 | -0.604135779 | 0.000874352 |
| gene-Led07845-sp3 | 1.67118207   | 2.09083E-11 |
| gene-Led07853-sp3 | -0.829611585 | 0.00019853  |
| gene-Led07856-sp3 | 1.063294108  | 0.001108253 |
| gene-Led07898-sp3 | 0.949576726  | 0.001776664 |
| gene-Led07904-sp3 | -0.671183851 | 4.82092E-05 |
| gene-Led07908-sp3 | 1.153615538  | 5.39705E-05 |
| gene-Led07914-sp3 | 0.949082367  | 0.000356815 |
| gene-Led07916-sp3 | 0.647022063  | 0.000363623 |
| gene-Led07917-sp3 | 1.028329944  | 0.000589696 |
| gene-Led07963-sp3 | 0.66983508   | 0.003090019 |
| gene-Led07979-sp3 | 0.740084121  | 6.24269E-05 |

|                   |              |             |
|-------------------|--------------|-------------|
| gene-Led07993-sp3 | -0.81513435  | 0.001373578 |
| gene-Led08008-sp3 | -0.815860173 | 0.001290939 |
| gene-Led08017-sp3 | -0.560668092 | 0.001386518 |
| gene-Led08052-sp3 | -0.630892241 | 0.001783831 |
| gene-Led08072-sp3 | -1.364711254 | 0.000230251 |
| gene-Led08110-sp3 | 0.571369804  | 0.00373508  |
| gene-Led08161-sp3 | 0.656227408  | 0.009552113 |
| gene-Led08165-sp3 | 2.273819436  | 0.000175793 |
| gene-Led08168-sp3 | 2.387671234  | 5.37336E-08 |
| gene-Led08177-sp3 | 1.107825746  | 0.006997222 |
| gene-Led08181-sp3 | 1.629841801  | 7.1264E-05  |
| gene-Led08184-sp3 | 2.395592702  | 2.94889E-24 |
| gene-Led08187-sp3 | 4.355372641  | 3.27426E-31 |
| gene-Led08195-sp3 | 1.987203996  | 0.00164171  |
| gene-Led08200-sp3 | 1.043990001  | 7.4918E-05  |
| gene-Led08203-sp3 | -0.60015764  | 0.000401364 |
| gene-Led08204-sp3 | -0.659077086 | 0.000241298 |
| gene-Led08217-sp3 | -2.35823162  | 3.03791E-16 |
| gene-Led08218-sp3 | -0.76077714  | 0.003528576 |
| gene-Led08238-sp3 | 1.722859482  | 5.71868E-07 |
| gene-Led08252-sp3 | 1.51804875   | 0.000513803 |
| gene-Led08334-sp3 | -0.663091673 | 0.00111811  |
| gene-Led08399-sp3 | 0.837345168  | 0.00075504  |
| gene-Led08418-sp3 | -0.542786648 | 0.008958717 |
| gene-Led08422-sp3 | -0.614136226 | 0.008388944 |
| gene-Led08432-sp3 | 0.988402125  | 4.12001E-06 |
| gene-Led08448-sp3 | 2.277302402  | 6.3521E-18  |
| gene-Led08460-sp3 | -1.456412932 | 0.001156605 |
| gene-Led08464-sp3 | -1.02250629  | 0.004579178 |
| gene-Led08489-sp3 | 0.748899921  | 0.001224066 |
| gene-Led08516-sp3 | 1.307867889  | 2.17204E-10 |
| gene-Led08562-sp3 | 0.91969013   | 0.003917089 |
| gene-Led08569-sp3 | -0.999901333 | 0.000323684 |
| gene-Led08597-sp3 | -0.652265333 | 0.001842152 |
| gene-Led08608-sp3 | -1.907695911 | 0.002327857 |
| gene-Led08610-sp3 | 1.537783485  | 5.39353E-07 |
| gene-Led08615-sp3 | -0.394485829 | 0.009240239 |
| gene-Led08622-sp3 | -3.517094449 | 3.84141E-33 |
| gene-Led08624-sp3 | -5.441844495 | 1.63254E-15 |
| gene-Led08625-sp3 | -2.243311588 | 7.22257E-11 |
| gene-Led08636-sp3 | -0.77764238  | 0.002929496 |
| gene-Led08645-sp3 | -0.902029523 | 0.003971875 |
| gene-Led08653-sp3 | 0.841758506  | 0.003336651 |
| gene-Led08657-sp3 | 1.93309745   | 0.00197773  |

|                   |              |             |
|-------------------|--------------|-------------|
| gene-Led08658-sp3 | 2.004482493  | 3.63316E-07 |
| gene-Led08658-sp3 | 1.79901145   | 0.002436622 |
| gene-Led08659-sp3 | 1.842540327  | 6.54508E-09 |
| gene-Led08681-sp3 | 0.847977764  | 0.004690931 |
| gene-Led08682-sp3 | 1.584239288  | 7.09324E-07 |
| gene-Led08706-sp3 | -1.954924933 | 1.57543E-09 |
| gene-Led08715-sp3 | -0.741404442 | 0.00112037  |
| gene-Led08727-sp3 | -0.655377662 | 0.006946148 |
| gene-Led08734-sp3 | -2.222116552 | 2.49932E-07 |
| gene-Led08744-sp3 | 0.980299802  | 0.003688888 |
| gene-Led08745-sp3 | -0.806103216 | 2.12231E-07 |
| gene-Led08750-sp3 | 1.092020908  | 0.000863707 |
| gene-Led08827-sp3 | -1.909657621 | 5.66755E-27 |
| gene-Led08829-sp3 | -1.435193876 | 1.81194E-09 |
| gene-Led08836-sp3 | 0.963867524  | 0.003697555 |
| gene-Led08838-sp3 | -0.897940544 | 1.84466E-06 |
| gene-Led08870-sp3 | 1.298817583  | 0.000437429 |
| gene-Led08877-sp3 | -1.150754606 | 5.27872E-10 |
| gene-Led08906-sp3 | 0.586909868  | 0.005379224 |
| gene-Led08908-sp3 | -0.557736734 | 0.005776293 |
| gene-Led08922-sp3 | -0.484030154 | 0.004397215 |
| gene-Led08924-sp3 | 1.828350727  | 2.14558E-08 |
| gene-Led08999-sp3 | -0.959540297 | 2.26542E-06 |
| gene-Led09023-sp3 | -0.624022807 | 7.78098E-05 |
| gene-Led09059-sp3 | -0.71701139  | 0.000779547 |
| gene-Led09060-sp3 | -0.908334963 | 0.006216908 |
| gene-Led09068-sp3 | 0.780754375  | 0.001643894 |
| gene-Led09072-sp3 | -0.619449052 | 0.000229501 |
| gene-Led09101-sp3 | -0.624145587 | 0.004550684 |
| gene-Led09126-sp3 | -0.872794747 | 4.14386E-06 |
| gene-Led09169-sp3 | -0.609594908 | 0.000123961 |
| gene-Led09171-sp3 | -0.534131779 | 0.004050505 |
| gene-Led09172-sp3 | -0.537249551 | 0.006870105 |
| gene-Led09175-sp3 | 1.325594459  | 2.84685E-08 |
| gene-Led09177-sp3 | 2.759227483  | 4.88207E-06 |
| gene-Led09201-sp3 | 1.13676146   | 4.05981E-06 |
| gene-Led09210-sp3 | 1.689427245  | 0.000340224 |
| gene-Led09233-sp3 | -0.66052839  | 0.001722301 |
| gene-Led09234-sp3 | 0.815674858  | 0.002691242 |
| gene-Led09259-sp3 | 0.788416769  | 0.006950857 |
| gene-Led09278-sp3 | -0.505388658 | 0.008457768 |
| gene-Led09320-sp3 | 1.762172357  | 0.008722943 |
| gene-Led09321-sp3 | 1.602068268  | 5.49021E-10 |
| gene-Led09374-sp3 | 1.912566199  | 0.002233024 |

|                   |              |             |
|-------------------|--------------|-------------|
| gene-Led09378-sp3 | 2.705715513  | 3.02535E-05 |
| gene-Led09380-sp3 | -0.660830806 | 0.004511189 |
| gene-Led09386-sp3 | -1.435024723 | 0.004713274 |
| gene-Led09418-sp3 | 2.564373366  | 4.73145E-31 |
| gene-Led09424-sp3 | 2.135009213  | 3.00002E-16 |
| gene-Led09439-sp3 | -0.64264001  | 6.21279E-05 |
| gene-Led09442-sp3 | 0.583080291  | 0.003214366 |
| gene-Led09450-sp3 | -1.721171741 | 6.71106E-14 |
| gene-Led09488-sp3 | 0.779322027  | 0.002429388 |
| gene-Led09499-sp3 | 0.715622885  | 0.004777377 |
| gene-Led09503-sp3 | 1.084292279  | 0.001173354 |
| gene-Led09504-sp3 | -0.99561821  | 9.42931E-05 |
| gene-Led09505-sp3 | -0.664039211 | 0.003815058 |
| gene-Led09517-sp3 | -0.982741972 | 3.75971E-09 |
| gene-Led09543-sp3 | 0.820675393  | 0.004709888 |
| gene-Led09557-sp3 | -1.500963314 | 5.16571E-06 |
| gene-Led09573-sp3 | 0.621796917  | 0.001054973 |
| gene-Led09598-sp3 | -0.638477315 | 0.00378525  |
| gene-Led09619-sp3 | 2.055105239  | 9.38115E-05 |
| gene-Led09623-sp3 | 1.222544359  | 0.007307617 |
| gene-Led09663-sp3 | 1.200500582  | 0.000335815 |
| gene-Led09680-sp3 | 0.599892479  | 0.00939505  |
| gene-Led09696-sp3 | -1.235668275 | 5.76318E-13 |
| gene-Led09702-sp3 | 1.238210754  | 1.07887E-06 |
| gene-Led09711-sp3 | 1.14306781   | 0.000483519 |
| gene-Led09712-sp3 | 1.850671448  | 7.28832E-06 |
| gene-Led09714-sp3 | 1.127610451  | 0.000408751 |
| gene-Led09731-sp3 | -0.54442307  | 0.001694028 |
| gene-Led09769-sp3 | 1.075679992  | 0.006560984 |
| gene-Led09806-sp3 | 2.979651199  | 0.000628379 |
| gene-Led09808-sp3 | 1.103997393  | 0.000315938 |
| gene-Led09812-sp3 | -0.90768372  | 0.003677944 |
| gene-Led09836-sp3 | 1.054827268  | 0.000856224 |
| gene-Led09839-sp3 | -0.55568313  | 0.000475408 |
| gene-Led09846-sp3 | -0.818633782 | 1.59123E-06 |
| gene-Led09895-sp3 | -0.740997964 | 0.001823826 |
| gene-Led09984-sp3 | -0.740239427 | 0.000164141 |
| gene-Led09989-sp3 | 0.693245089  | 0.00595943  |
| gene-Led10005-sp3 | 1.473238559  | 0.001860907 |
| gene-Led10006-sp3 | 2.161013982  | 1.82842E-08 |
| gene-Led10034-sp3 | -0.522401045 | 0.00662565  |
| gene-Led10040-sp3 | -0.502365407 | 0.002698797 |
| gene-Led10050-sp3 | 1.209165375  | 5.65767E-07 |
| gene-Led10065-sp3 | 0.678251257  | 0.005121503 |

|                   |              |             |
|-------------------|--------------|-------------|
| gene-Led10108-sp3 | 3.700598959  | 2.39187E-06 |
| gene-Led10111-sp3 | 0.632235653  | 0.004696889 |
| gene-Led10121-sp3 | 0.881716539  | 0.00195228  |
| gene-Led10163-sp3 | 1.542706748  | 4.6195E-05  |
| gene-Led10176-sp3 | 0.779414847  | 0.00016738  |
| gene-Led10184-sp3 | 2.005597819  | 5.1888E-10  |
| gene-Led10210-sp3 | 1.449863263  | 5.94211E-07 |
| gene-Led10217-sp3 | -0.749697743 | 0.007465637 |
| gene-Led10225-sp3 | 1.107036715  | 1.17967E-06 |
| gene-Led10239-sp3 | -0.944258187 | 2.78613E-06 |
| gene-Led10246-sp3 | 1.384430806  | 2.12736E-15 |
| gene-Led10262-sp3 | -0.382715066 | 0.003562503 |
| gene-Led10312-sp3 | 2.115878201  | 6.06552E-08 |
| gene-Led10316-sp3 | 2.335195994  | 1.12441E-15 |
| gene-Led10321-sp3 | -1.92395671  | 8.99548E-06 |
| gene-Led10322-sp3 | 2.636242024  | 7.40555E-06 |
| gene-Led10323-sp3 | -1.4152756   | 0.000107172 |
| gene-Led10329-sp3 | 0.923116721  | 0.001414392 |
| gene-Led10340-sp3 | 1.313542633  | 0.000136438 |
| gene-Led10354-sp3 | 1.210000665  | 0.000168309 |
| gene-Led10375-sp3 | -0.621572609 | 0.000695739 |
| gene-Led10477-sp3 | 1.881649481  | 5.01388E-06 |
| gene-Led10479-sp3 | 4.021739235  | 2.764E-18   |
| gene-Led10483-sp3 | -2.327037328 | 1.19454E-08 |
| gene-Led10484-sp3 | -1.803784969 | 1.93298E-11 |
| gene-Led10490-sp3 | -2.074991818 | 7.37038E-11 |
| gene-Led10526-sp3 | -2.212835357 | 5.56712E-20 |
| gene-Led10530-sp3 | 1.086927632  | 4.84463E-05 |
| gene-Led10555-sp3 | -1.402395172 | 6.98771E-08 |
| gene-Led10556-sp3 | 1.322768979  | 0.000712498 |
| gene-Led10562-sp3 | -0.680695416 | 3.65609E-05 |
| gene-Led10567-sp3 | 1.039594917  | 8.60507E-06 |
| gene-Led10581-sp3 | 3.607214559  | 4.52782E-05 |
| gene-Led10588-sp3 | 0.470858172  | 0.00527267  |
| gene-Led10615-sp3 | -0.625510722 | 1.82739E-05 |
| gene-Led10621-sp3 | 2.725566013  | 4.21239E-06 |
| gene-Led10627-sp3 | -1.073811041 | 1.90336E-06 |
| gene-Led10630-sp3 | -0.703981672 | 0.005128837 |
| gene-Led10639-sp3 | 0.952031399  | 0.000893887 |
| gene-Led10693-sp3 | 2.359199531  | 1.25675E-08 |
| gene-Led10728-sp3 | -0.567368669 | 0.000680871 |
| gene-Led10733-sp3 | 0.838594834  | 9.61579E-05 |
| gene-Led10735-sp3 | 1.049080609  | 3.53062E-06 |
| gene-Led10757-sp3 | -1.200249428 | 7.1704E-05  |

|                   |              |             |
|-------------------|--------------|-------------|
| gene-Led10760-sp3 | 0.531207508  | 0.003782011 |
| gene-Led10768-sp3 | 1.53015464   | 1.71575E-17 |
| gene-Led10771-sp3 | -0.610551916 | 0.008298145 |
| gene-Led10808-sp3 | -1.926505962 | 0.000127137 |
| gene-Led10813-sp3 | -0.656686864 | 0.000352281 |
| gene-Led10875-sp3 | 0.687240239  | 0.004686808 |
| gene-Led10877-sp3 | -0.699829031 | 0.000924487 |
| gene-Led10878-sp3 | 0.98106957   | 0.00142818  |
| gene-Led10879-sp3 | 0.793845467  | 2.52157E-05 |
| gene-Led10891-sp3 | -1.031286489 | 4.85211E-09 |
| gene-Led10892-sp3 | -3.095225243 | 8.30333E-08 |
| gene-Led10897-sp3 | 1.084567273  | 6.45506E-06 |
| gene-Led10913-sp3 | 3.423791331  | 7.3177E-05  |
| gene-Led10925-sp3 | 1.492250361  | 3.2736E-10  |
| gene-Led10927-sp3 | 0.770805775  | 0.006427538 |
| gene-Led10930-sp3 | -0.554238265 | 0.002200263 |
| gene-Led10936-sp3 | 0.853487033  | 0.000622618 |
| gene-Led10991-sp3 | -2.084032588 | 1.95085E-20 |
| gene-Led10993-sp3 | -0.727146548 | 0.001158677 |
| gene-Led11014-sp3 | 0.604590476  | 0.000676491 |
| gene-Led11023-sp3 | 2.322663126  | 7.14496E-06 |
| gene-Led11071-sp3 | -1.794758635 | 0.002458813 |
| gene-Led11091-sp3 | 0.856273322  | 0.002538886 |
| gene-Led11122-sp3 | -2.943187723 | 3.75977E-10 |
| gene-Led11194-sp3 | 1.041588956  | 0.00933979  |
| gene-Led11203-sp3 | -1.937257998 | 3.44707E-10 |
| gene-Led11234-sp3 | 2.734298119  | 3.76071E-24 |
| gene-Led11282-sp3 | 2.782986473  | 4.89823E-22 |
| gene-Led11319-sp3 | 0.807690905  | 0.001792685 |
| gene-Led11452-sp3 | 1.04088619   | 0.002618091 |
| gene-Led11455-sp3 | -1.338955707 | 0.000172024 |

---

**Table S6 Common DEGs between Venn diagram**

|                   |
|-------------------|
| gene-Led00095-sp3 |
| gene-Led00127-sp3 |
| gene-Led00180-sp3 |
| gene-Led00287-sp3 |
| gene-Led00345-sp3 |
| gene-Led00553-sp3 |
| gene-Led00680-sp3 |
| gene-Led00683-sp3 |
| gene-Led00910-sp3 |
| gene-Led00929-sp3 |
| gene-Led01098-sp3 |
| gene-Led01338-sp3 |
| gene-Led01347-sp3 |
| gene-Led01536-sp3 |
| gene-Led01538-sp3 |
| gene-Led01568-sp3 |
| gene-Led01764-sp3 |
| gene-Led01765-sp3 |
| gene-Led01978-sp3 |
| gene-Led02063-sp3 |
| gene-Led02397-sp3 |
| gene-Led02690-sp3 |
| gene-Led02755-sp3 |
| gene-Led02776-sp3 |
| gene-Led03250-sp3 |
| gene-Led03434-sp3 |
| gene-Led03576-sp3 |
| gene-Led03682-sp3 |
| gene-Led03887-sp3 |
| gene-Led03896-sp3 |
| gene-Led03898-sp3 |
| gene-Led03907-sp3 |
| gene-Led04121-sp3 |
| gene-Led04279-sp3 |
| gene-Led04345-sp3 |
| gene-Led04429-sp3 |
| gene-Led04499-sp3 |
| gene-Led04617-sp3 |
| gene-Led04683-sp3 |
| gene-Led04763-sp3 |
| gene-Led04796-sp3 |
| gene-Led04806-sp3 |
| gene-Led04949-sp3 |



gene-Led05017-sp3  
gene-Led05022-sp3  
gene-Led05031-sp3  
gene-Led05063-sp3  
gene-Led05068-sp3  
gene-Led05095-sp3  
gene-Led05130-sp3  
gene-Led05133-sp3  
gene-Led06015-sp3  
gene-Led06338-sp3  
gene-Led06391-sp3  
gene-Led06524-sp3  
gene-Led06546-sp3  
gene-Led06582-sp3  
gene-Led06888-sp3  
gene-Led06957-sp3  
gene-Led07102-sp3  
gene-Led07148-sp3  
gene-Led07155-sp3  
gene-Led07224-sp3  
gene-Led07517-sp3  
gene-Led07525-sp3  
gene-Led07526-sp3  
gene-Led07626-sp3  
gene-Led08187-sp3  
gene-Led08218-sp3  
gene-Led08460-sp3  
gene-Led08636-sp3  
gene-Led08734-sp3  
gene-Led08827-sp3  
gene-Led09023-sp3  
gene-Led09321-sp3  
gene-Led09418-sp3  
gene-Led09424-sp3  
gene-Led09450-sp3  
gene-Led10484-sp3  
gene-Led10555-sp3  
gene-Led10768-sp3  
gene-Led10927-sp3  
gene-Led11122-sp3

---

**Table S7 The top 20 enriched GO terms of DEGs in LeHH24h vs LeHH0h**

| <b>ID</b>  | <b>Description</b>                           | <b>Pvalue</b> | <b>Qvalue</b> | <b>Up</b> | <b>Down</b> |
|------------|----------------------------------------------|---------------|---------------|-----------|-------------|
| GO:0055114 | oxidation-reduction process                  | 1.09E-09      | 6.61E-07      | 60        | 34          |
| GO:0005618 | cell wall                                    | 1.15E-06      | 7.07E-05      | 8         | 0           |
| GO:0009277 | fungal-type cell wall                        | 1.15E-06      | 7.07E-05      | 8         | 0           |
| GO:0030312 | external encapsulating structure             | 1.15E-06      | 7.07E-05      | 8         | 0           |
| GO:0000786 | nucleosome                                   | 5.76E-05      | 0.0026505     | 8         | 0           |
| GO:0032993 | protein-DNA complex                          | 0.000164      | 0.0060359     | 8         | 0           |
| GO:0044815 | DNA packaging complex                        | 0.0002593     | 0.0079505     | 8         | 0           |
| GO:0005840 | ribosome                                     | 0.0003698     | 0.0097197     | 20        | 1           |
| GO:0000785 | chromatin                                    | 0.0005984     | 0.0137635     | 9         | 0           |
| GO:0005743 | mitochondrial inner membrane                 | 0.0007475     | 0.0152832     | 10        | 0           |
| GO:0019866 | organelle inner membrane                     | 0.0009807     | 0.0179978     | 10        | 0           |
| GO:0005740 | mitochondrial envelope                       | 0.001076      | 0.0179978     | 13        | 0           |
| GO:0098800 | inner mitochondrial membrane protein complex | 0.0011803     | 0.0180983     | 8         | 0           |
| GO:0030529 | intracellular ribonucleoprotein complex      | 0.0013996     | 0.0198103     | 23        | 2           |
| GO:1990904 | ribonucleoprotein complex                    | 0.001564      | 0.0205556     | 23        | 2           |
| GO:0071944 | cell periphery                               | 0.00168       | 0.0206075     | 10        | 1           |
| GO:0098798 | mitochondrial protein complex                | 0.0024742     | 0.0284532     | 9         | 0           |
| GO:0016491 | oxidoreductase activity                      | 6.33E-11      | 2.08E-08      | 62        | 40          |
| GO:0005199 | structural constituent of cell wall          | 7.34E-07      | 0.0001208     | 8         | 0           |
| GO:0005198 | structural molecule activity                 | 2.13E-05      | 0.0023376     | 28        | 1           |

**Table S8 The top 20 enriched KEGG terms of DEGs in LeHH24h vs LeHH0h**

| <b>KEGG_A class</b>               | <b>Pathway</b>                                             | <b>out<br/>(217)</b> | <b>All<br/>(2086)</b> | <b>Pvalue</b> | <b>Qvalue</b> | <b>Pathway<br/>ID</b> |
|-----------------------------------|------------------------------------------------------------|----------------------|-----------------------|---------------|---------------|-----------------------|
| Genetic Information<br>Processing | Ribosome                                                   | 24                   | 94                    | 1.48E-05      | 0.001421      | ko03010               |
| Metabolism                        | Glycolysis / Gluconeogenesis                               | 13                   | 45                    | 0.000412      | 0.01977       | ko00010               |
| Metabolism                        | Methane metabolism                                         | 8                    | 22                    | 0.00106       | 0.033909      | ko00680               |
| Metabolism                        | Carbon metabolism                                          | 20                   | 106                   | 0.005008      | 0.088727      | ko01200               |
| Metabolism                        | Tyrosine metabolism                                        | 7                    | 22                    | 0.005206      | 0.088727      | ko00350               |
| Metabolism                        | Metabolic pathways                                         | 113                  | 912                   | 0.005545      | 0.088727      | ko01100               |
| Metabolism                        | Glyoxylate and dicarboxylate metabolism                    | 7                    | 24                    | 0.008815      | 0.114572      | ko00630               |
| Metabolism                        | Oxidative phosphorylation                                  | 14                   | 69                    | 0.009548      | 0.114572      | ko00190               |
| Metabolism                        | Biosynthesis of secondary metabolites                      | 50                   | 358                   | 0.011634      | 0.124092      | ko01110               |
| Metabolism                        | Glycerolipid metabolism                                    | 7                    | 29                    | 0.025352      | 0.243383      | ko00561               |
| Metabolism                        | Linoleic acid metabolism                                   | 2                    | 3                     | 0.030107      | 0.262752      | ko00591               |
| Metabolism                        | Fatty acid degradation                                     | 7                    | 31                    | 0.035724      | 0.285791      | ko00071               |
| Metabolism                        | Ascorbate and aldarate metabolism                          | 4                    | 15                    | 0.06202       | 0.457996      | ko00053               |
| Metabolism                        | Fructose and mannose metabolism                            | 5                    | 24                    | 0.095874      | 0.607639      | ko00051               |
| Metabolism                        | Sulphur metabolism                                         | 5                    | 24                    | 0.095874      | 0.607639      | ko00920               |
| Metabolism                        | Sesquiterpenoid and triterpenoid biosynthesis              | 1                    | 1                     | 0.104027      | 0.607639      | ko00909               |
| Metabolism                        | Biosynthesis of unsaturated fatty acids                    | 4                    | 18                    | 0.108918      | 0.607639      | ko01040               |
| Metabolism                        | Glycosphingolipid biosynthesis - globo and isoglobo series | 2                    | 6                     | 0.122046      | 0.607639      | ko00603               |
| Metabolism                        | Pyruvate metabolism                                        | 8                    | 49                    | 0.129558      | 0.607639      | ko00620               |
| Cellular Processes                | Mitophagy - yeast                                          | 6                    | 34                    | 0.134449      | 0.607639      | ko04139               |
